# Supplementary material for: National survey of attitudes towards and intentions to vaccinate against COVID-19: implications for communications
Source: PubMed Central journal article supplement (PMC8557244; doi:10.1136/bmjopen-2021-055085), 2021-10-27
Supplement: bmjopen-2021-055085.draft_revisions.pdf [file bmjopen-2021-055085.draft_revisions.pdf]

# BMJ Open

BMJ Open is committed to open peer review. As part of this commitment we make the peer review history of every article we publish publicly available.

When an article is published we post the peer reviewers' comments and the authors' responses online. We also post the versions of the paper that were used during peer review. These are the versions that the peer review comments apply to.

The versions of the paper that follow are the versions that were submitted during the peer review process. They are not the versions of record or the final published versions. They should not be cited or distributed as the published version of this manuscript.

BMJ Open is an open access journal and the full, final, typeset and author-corrected version of record of the manuscript is available on our site with no access controls, subscription charges or pay-per-view fees (<http://bmjopen.bmj.com>).

If you have any questions on BMJ Open's open peer review process please email [info.bmjopen@bmj.com](mailto:info.bmjopen@bmj.com)

# BMJ Open

## A national survey of attitudes towards and intentions to vaccinate against COVID-19: implications for communications

|                               |                                                                                                                                                                                                                                                                                                                                                                                                                                                                                                                                                                                                                                                                                                                                                                                                                                                                              |
|-------------------------------|------------------------------------------------------------------------------------------------------------------------------------------------------------------------------------------------------------------------------------------------------------------------------------------------------------------------------------------------------------------------------------------------------------------------------------------------------------------------------------------------------------------------------------------------------------------------------------------------------------------------------------------------------------------------------------------------------------------------------------------------------------------------------------------------------------------------------------------------------------------------------|
| Journal:                      | <i>BMJ Open</i>                                                                                                                                                                                                                                                                                                                                                                                                                                                                                                                                                                                                                                                                                                                                                                                                                                                              |
| Manuscript ID                 | bmjopen-2021-055085                                                                                                                                                                                                                                                                                                                                                                                                                                                                                                                                                                                                                                                                                                                                                                                                                                                          |
| Article Type:                 | Original research                                                                                                                                                                                                                                                                                                                                                                                                                                                                                                                                                                                                                                                                                                                                                                                                                                                            |
| Date Submitted by the Author: | 01-Jul-2021                                                                                                                                                                                                                                                                                                                                                                                                                                                                                                                                                                                                                                                                                                                                                                                                                                                                  |
| Complete List of Authors:     | Stead, Martine; University of Stirling Institute for Social Marketing and Health<br>Jessop, Curtis; NatCen Social Research<br>Angus, Kathryn; University of Stirling Institute for Social Marketing and Health<br>Bedford, Helen; UCL Great Ormond Street Institute of Child Health Population Policy and Practice<br>Ussher, Michael; University of Stirling Institute for Social Marketing and Health; St George's University of London Population Health Research Institute<br>Ford, Allison; University of Stirling Institute for Social Marketing and Health<br>Eadie, Douglas; University of Stirling Institute for Social Marketing and Health<br>MacGregor, Andy; NatCen Social Research<br>Hunt, Kate; University of Stirling Institute for Social Marketing and Health<br>MacKintosh, Anne Marie; University of Stirling Institute for Social Marketing and Health |
| Keywords:                     | COVID-19, IMMUNOLOGY, Epidemiology < INFECTIOUS DISEASES, Public health < INFECTIOUS DISEASES, PUBLIC HEALTH                                                                                                                                                                                                                                                                                                                                                                                                                                                                                                                                                                                                                                                                                                                                                                 |
|                               |                                                                                                                                                                                                                                                                                                                                                                                                                                                                                                                                                                                                                                                                                                                                                                                                                                                                              |

SCHOLARONE™  
Manuscripts

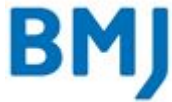

I, the Submitting Author has the right to grant and does grant on behalf of all authors of the Work (as defined in the below author licence), an exclusive licence and/or a non-exclusive licence for contributions from authors who are: i) UK Crown employees; ii) where BMJ has agreed a CC-BY licence shall apply, and/or iii) in accordance with the terms applicable for US Federal Government officers or employees acting as part of their official duties; on a worldwide, perpetual, irrevocable, royalty-free basis to BMJ Publishing Group Ltd ("BMJ") its licensees and where the relevant Journal is co-owned by BMJ to the co-owners of the Journal, to publish the Work in this journal and any other BMJ products and to exploit all rights, as set out in our [licence](#).

The Submitting Author accepts and understands that any supply made under these terms is made by BMJ to the Submitting Author unless you are acting as an employee on behalf of your employer or a postgraduate student of an affiliated institution which is paying any applicable article publishing charge ("APC") for Open Access articles. Where the Submitting Author wishes to make the Work available on an Open Access basis (and intends to pay the relevant APC), the terms of reuse of such Open Access shall be governed by a Creative Commons licence – details of these licences and which [Creative Commons](#) licence will apply to this Work are set out in our licence referred to above.

Other than as permitted in any relevant BMJ Author's Self Archiving Policies, I confirm this Work has not been accepted for publication elsewhere, is not being considered for publication elsewhere and does not duplicate material already published. I confirm all authors consent to publication of this Work and authorise the granting of this licence.

# A national survey of attitudes towards and intentions to vaccinate against COVID-19: implications for communications

Martine Stead, Deputy Director<sup>1\*</sup>

Curtis Jessop, Research Director for Longitudinal Surveys<sup>2</sup>

Kathryn Angus, Research Officer<sup>1</sup>

Helen Bedford, Professor of Children's Health<sup>3</sup>

Michael Ussher, Professor of Behavioural Medicine<sup>1,4</sup>

Allison Ford, Research Fellow<sup>1</sup>

Douglas Eadie, Research Fellow<sup>1</sup>

Andy MacGregor, Director of Policy Research<sup>2</sup>

Kate Hunt, Professor of Behavioural Sciences and Health<sup>1</sup>

Anne Marie MacKintosh, Senior Researcher<sup>1</sup>

<sup>1</sup>Institute for Social Marketing and Health, University of Stirling, Stirling, UK

<sup>2</sup>NatCen The National Centre for Social Research, London, UK

<sup>3</sup>Great Ormond Street Institute of Child Health, University College London, London, UK

<sup>4</sup>Population Health Research Institute, St George's University of London, London, UK

\*Corresponding author: [martine.stead@stir.ac.uk](mailto:martine.stead@stir.ac.uk), +44(0)1786 467390, Institute for Social Marketing and Health, University of Stirling, Stirling, FK9 4LA, UK

## Abstract

### Objectives

To examine public views on COVID-19 vaccination and consider the implications for communications and targeted support.

### Design

Cross-sectional study.

### Setting

Online and telephone nationally representative survey in Great Britain, January to February 2021.

### Participants

4,978 adults. Survey response rate was 84%, among the 5,931 panellists invited.

### Main Outcome Measures

Sociodemographic characteristics (age, gender, ethnicity, education, financial status), COVID-19 status, vaccine acceptance, trust in COVID-19 vaccination information sources, perceptions of vaccination priority groups, and perceptions of importance of second dose.

### Results

COVID-19 vaccine acceptance (83%) was associated with increasing age, higher level of education and having been invited for vaccination. Acceptance decreased with unconfirmed past COVID-19, greater financial hardship, and non-White British ethnicity; Black/Black British participants had lowest acceptance. Overall, healthcare and scientific sources of information were most trusted. Compared with White British participants, other ethnicities had lower trust in healthcare and scientific sources. Those with lower educational attainment or financial hardship had lower trust in healthcare and scientific sources. Those with no qualifications had higher trust in media and family/friends. While trust was low overall in community or faith leaders it was higher among those with Asian/Asian British and Black/Black British ethnicity compared with White British participants. Views of vaccine prioritisation were mostly consistent with UK official policy but there was support for prioritising additional groups. There was high support for having the second vaccine dose.

### Conclusions

Targeted engagement is needed to address COVID-19 vaccine hesitancy in non-White British ethnic groups, in younger adults, and among those with lower education, greater financial hardship and unconfirmed past infection. Healthcare professionals and scientific advisors should play a central role in communications and tailored messaging is needed for hesitant groups. Careful communication around vaccination prioritisation continues to be required.

## STRENGTHS AND LIMITATIONS OF THIS STUDY

- The survey was conducted at the start of vaccine rollout giving timely insight into COVID-19 vaccine acceptance/hesitancy and trusted information sources when individuals' decision-making was real rather than hypothetical.
- Results come from a large probability-based sample, representative of adults in Great Britain, which was sufficiently large to examine ethnicity in detail.
- The survey measured acceptance of which groups should be prioritised for vaccination and the importance of a second dose.
- The survey benefited from a rigorous design, with questionnaire development informed by cognitive interviews conducted with a broad range of individuals.
- A cross-sectional survey cannot infer causality; although variables likely to be important in vaccine acceptance were included, the results are exploratory.

## Introduction

Widespread vaccination is likely to be one of the most effective ways of controlling the COVID-19 pandemic, and is central to the UK government's recovery strategy. The UK vaccine programme began in December 2020, prioritising older adults in care homes and their carers, those aged over 80, and frontline health and social-care workers.<sup>1</sup> Administration of first doses of vaccination to the adult population, by decade of age, is to be completed by July 2021. Uncertainty or unwillingness to accept vaccination – 'vaccine hesitancy'<sup>2</sup> – threatens comprehensive vaccination.<sup>3,4</sup> Before the introduction of a COVID-19 vaccine, UK surveys reported that 64% to 82% of adults were willing to be vaccinated.<sup>5-12</sup> Most of these studies used non-probability samples, introducing selection bias and limiting generalisability. Increased vaccine confidence has been reported since vaccination commenced;<sup>13</sup> possibly due to increased COVID-19 cases and deaths, a further UK lockdown in early 2021, and, increasingly, vaccination becoming the social norm. It is important to examine vaccine acceptance when people are making *active*, rather than *hypothetical*, decisions about vaccination. This also provides insight into potential acceptance of repeat COVID-19 vaccination and boosters.<sup>14</sup>

UK uptake has been high (94% of adults surveyed in April reported uptake or intention to accept vaccination),<sup>13</sup> but there remain concerns about uptake in subpopulations, such as younger adults and some ethnic minorities,<sup>15</sup> giving rise to initiatives such as social media campaigns featuring non-White celebrities.<sup>16</sup> Robust, timely data are needed to identify the characteristics of groups with lower acceptance and the information sources they trust, to inform targeted interventions. It is also important to assess whether attitudes towards COVID-19 vaccination have been affected by specific events and media coverage. Two issues in the UK merit particular attention. First, the government followed recommendations to offer the vaccine to priority groups.<sup>1</sup> If this approach is continued, it is important to examine its acceptability and any implications for communications. Secondly, the government decided, on 30<sup>th</sup> December 2020, to deviate from recommended protocols for the Pfizer-BioNTech vaccine by extending the interval between doses to up to 12 weeks;<sup>1</sup> this precipitated concerns that it may lead to reduced willingness to be vaccinated or to have a second dose.<sup>17</sup>

We conducted a survey in early 2021, using probability sampling, to examine public views on COVID-19 vaccination and consider the implications for communications. During this period most people aged over 80 had been invited to have a vaccine and invitations were being extended to those aged over 70, with other age groups advised they would be invited in the coming months.

## Methods

1  
2  
3 We administered a cross-sectional survey with adults (aged 18+) in Great Britain (GB) in January  
4 and February 2021. This paper follows the STROBE Statement for reporting cross-sectional studies  
5 (see checklist in Supplementary Material).  
6  
7

### 8 **Questionnaire development and testing**

9 The questionnaire was informed by a review of studies on public attitudes towards and experiences  
10 of vaccines and COVID-19. Existing measures were adapted<sup>5,18,19</sup> and new questions developed.  
11 The questionnaire was cognitively tested to ensure understandability.<sup>20</sup> Interviews were conducted  
12 with 20 individuals with a mix of genders, ages, parental status, likelihood of accepting a COVID-19  
13 vaccination, and experiences of shielding. The questionnaire was subsequently revised based on  
14 these interviews. Final revisions reflected changes in the UK's vaccine rollout. The questionnaire  
15 covered: vaccine acceptance, trust in vaccine information sources, perception of priority groups,  
16 COVID-19 status, and perceived importance of a second dose.  
17  
18  
19  
20  
21

### 22 **Sample and data collection**

23 The survey was administered to the probability-based NatCen Panel,<sup>21</sup> recruited from the 2018,  
24 2019, and 2020 waves of the British Social Attitudes survey, with participants randomly selected  
25 from England, Wales and Scotland. Data were collected through online and telephone interviews  
26 (conducted January 14<sup>th</sup> to February 7<sup>th</sup> 2021). Panellists were sent reminders and offered a small  
27 financial sum in recognition of their contribution. Among 5,931 panellists invited, the survey  
28 response rate was 84%, with 4,978 completing it (4,776 online, 202 by telephone). Supplementary  
29 Material, Table S1 details overall response rate, accounting for non-response at the panel  
30 recruitment stage and panel attrition. Data were weighted for non-response and to be representative  
31 of the GB adult population.  
32  
33  
34  
35  
36  
37

### 38 **Measures**

#### 39 *Sociodemographic and other characteristics*

40 Data on age, gender, ethnicity, education, country, urban/rural status, and financial status were  
41 obtained from existing information on NatCen panellists. Full details of sub-groups of each variable  
42 are provided in Tables 1 and 2. Age was categorised into bands from 18-29 years then ten-year  
43 bands up to 80+. Self-assigned ethnicity was recorded in six categories, and education in five  
44 categories according to highest qualification. As indices of multiple deprivation were not available,  
45 self-reported financial status was used. COVID-19 status was derived from two items: 1) "*Have you*  
46 *officially been diagnosed with the coronavirus (COVID-19)?*" (*yes/no/don't know*); those answering  
47 other than 'yes' were asked: 2) "*Do you think you have ever had the coronavirus (COVID-19)?*"  
48 (*yes-definitely/yes-probably/no-probably not/no-definitely not/don't know*).  
49  
50  
51  
52  
53  
54

#### 55 *Vaccine measures*

56 Vaccine acceptance was derived from five items: 1) "*Have you been offered a vaccine for COVID-*  
57 *19?*" (*yes/no*). Those answering 'yes' were asked: 2) "*And have you had that vaccine?*" (*yes/no*).  
58 Participants who had been offered but not yet had the vaccine were then asked: 3) "*And do you*  
59  
60



1  
2  
3 *intend to have that vaccine?" (yes/no/not sure). Participants who had not yet been offered the*  
4 *vaccine were asked: 4) "Would you accept the vaccine for yourself if it is offered to you?"*  
5 *(yes/no/not sure). Those answering 'not sure' were asked: 5) "If you had to choose, if a COVID-19*  
6 *vaccine became publicly available and you were offered it, would you accept the vaccine for*  
7 *yourself?" (yes/no/I'm really not sure). Participants were classed as: 'Accepted/accepting' if they*  
8 *answered 'yes' to any of items 2, 3, 4, or 5; 'Uncertain' if they answered 'not sure' to item 3 or 'I'm*  
9 *really not sure' to item 5; and 'Refused/refusing' if they answered 'no' to items 3, 4, or 5.*

10  
11  
12  
13  
14 Trust in information sources was assessed for 13 sources: "*To what extent, if at all, would you trust*  
15 *information about a COVID-19 vaccine from each of the following sources?" (see Table 3):*  
16 *completely (1); a great deal (2); somewhat (3); very little (4); not at all (5).*

17  
18  
19 Perceptions of vaccine priority groups were assessed across 11 groups (see Table 4): "*Below are*  
20 *some groups that some people say should be the first to be offered a COVID-19 vaccine. For each*  
21 *one, how high a priority do you think it is that they get a COVID-19 vaccine, or do you not think they*  
22 *should be offered the vaccine at all?": 1 'One of the first', 5 'One of the last', with an additional*  
23 *option "They should not be offered a vaccine".*

24  
25  
26 Perceived importance of receiving the second dose of the vaccine was assessed with: "*How*  
27 *important, if at all, do you think it is for people to get the second injection of the COVID-19*  
28 *vaccine?": very important (1); fairly important (2); not very important (3); not at all important (4).*

### 31 **Data analysis**

32  
33 Descriptive data, including bivariate analyses, were weighted to be representative of British adult  
34 population. Initial bivariate analyses, using chi-square tests, examined correlates of vaccine  
35 acceptance and trust in sources of information about COVID-19 vaccination. Multivariate logistic  
36 regression was conducted to examine differences in vaccine acceptance controlling for socio-  
37 demographic variables, vaccine offer, and COVID-19 status. The dependent variable dichotomised  
38 those classed as *accepted/intending to accept vs uncertain/refused/intend to refuse*. Age was  
39 entered as a categorical variable and the 'difference' contrast within SPSS logistic regression was  
40 used to test influence of each increasing age group, relative to younger ages (e.g., 30-39 vs 18-29;  
41 80+ vs 18-79) (see Table 2). Sociodemographic variation in trust in information sources was  
42 examined using multivariate logistic regressions. For each information source, the dependent  
43 variable dichotomised the 5-point scale into trusting *completely or a great deal vs somewhat/very*  
44 *little/not at all*. Cases were excluded from the logistic regressions if they had missing data on the  
45 dependent or any independent variables. All logistic regressions were conducted on unweighted  
46 data as sociodemographic variables were included as control variables. For each information  
47 source, logistic regression analysis examined likelihood of trust (completely/a great deal v  
48 somewhat/very little/not at all) by sociodemographic characteristics (Supplementary Material, Tables  
49 S2-S14). Data were analysed using SPSS v27.

## Results

### Sample characteristics

The weighted sample comprised adults aged 18 and over (see Table 1). Over half (52%) were female and 81% were White British. Around two-thirds reported 'living comfortably'/'doing alright', while one in ten rated their financial status as 'quite' or 'very difficult'. Just over two-fifths were educated to degree level or above, while for almost a quarter their highest qualification was A level or equivalent. A minority (12%) had no qualifications. A minority indicated having been diagnosed with COVID-19 (6%); nearly two-thirds thought they probably or definitely had not had COVID-19; 11% were unsure.

### Vaccine offer and acceptance

At the time of the survey, 14% (n=716) had been offered the vaccine. Of these, 92% (n=658) had accepted or intended to, 4% (n=29) were uncertain, and 4% (n=29) had refused or intended to refuse.

Among those not yet offered the vaccine, 82% (n=3479) intended to accept, while 11% (n=471) were uncertain and 7% (n=311) indicated they would refuse. Overall, the acceptance level was 83% (n=4137), with 10% (n=502) uncertain and 7% (n=340) refusing.

Multivariate logistic regression, with vaccine acceptance as the outcome variable (accepted/accepting v refused/refusing/uncertain), indicated likelihood of acceptance increased with age (Table 2). For example, those aged 40-49 were more likely than 18-39-year-olds to indicate acceptance (AOR=1.43, 95%CI (1.12, 1.83), p=0.004) as were 70-79-year-olds compared with 18-69-year-olds (AOR=3.31, 95%CI (2.22, 4.95), p<0.001). Acceptance was also positively associated with education. Those with at least a degree were three times as likely to indicate acceptance (AOR=3.03, 95%CI (2.17, 4.23), p<0.001) and those educated to A level or equivalent nearly twice as likely (AOR=1.80, 95%CI (1.27, 2.55), p<0.001), compared with people without qualifications. Lower acceptance was also associated with financial hardship and ethnicity. For example, compared with those 'living comfortably', people 'finding it very difficult' were much less likely to accept the vaccine (AOR=0.35, 95%CI (0.22, 0.55), p<0.001). Compared with White British participants, those from other ethnic groups were less likely to accept the vaccine. Black/Black British participants had the lowest likelihood of accepting (AOR=0.25, 95%CI (0.14, 0.43), p<0.001). This is illustrated in the descriptive data too, with 87% of White British participants indicating vaccine acceptance compared with 58% among Black/Black British, 61% among mixed/multiple ethnic groups and 61% among Asian/Asian British.

After controlling for demographic variables, vaccine acceptance was positively associated with having been invited for vaccination (AOR=1.73, 95%CI (1.24, 2.43), p=0.001), but negatively associated with COVID-19 status. Compared with those who had 'probably not' or 'definitely not' had COVID-19, those who thought they had 'definitely' or 'probably' had COVID-19 were less likely

1  
2  
3 to indicate acceptance (AOR = 0.40, 95%CI (0.26, 0.60),  $p < 0.001$  and AOR=0.71, 95%CI (0.56,  
4 0.91),  $p = 0.006$  respectively). Confirmed diagnosis with COVID-19 was not significantly associated  
5 with vaccine acceptance, after controlling for demographic variables.  
6  
7

### 8 **Trust in information sources**

9 The three most trusted information sources were: the NHS; doctors/nurses/other healthcare  
10 professionals; and scientific and medical advisers. These groups were trusted 'completely/a great  
11 deal' by around 80% of participants (Table 3). Only 44% trusted the UK government 'completely/a  
12 great deal'. The three least trusted sources were celebrities and social media influencers, social  
13 media, and faith or community leaders; around two-thirds indicated they would have no trust in  
14 each. A majority (61%) indicated they had very little/no trust in the media (e.g.,  
15 newspapers/magazines/television/radio).  
16  
17

18 Trust did not differ by gender except for drug companies and the WHO, with females more likely to  
19 indicate trust in these sources (Tables S5 and S9 respectively).  
20  
21

22 Trust was higher among older participants for five sources (doctors/nurses/other healthcare  
23 professionals, NHS, UK government, media, and family/friends; Tables S2, S4, S6, S10, S13). For  
24 example, trust in the UK government was higher among those aged 50-59 than 18-49-year-olds  
25 (Table S6).  
26  
27

28 Trust varied by education. Compared with those without qualifications, other participants were more  
29 likely to trust five sources (doctors/nurses/other healthcare professionals, pharmacists, NHS,  
30 scientists, WHO; Tables S2-S4, S8, S9) and less likely to trust another five (drug companies, media,  
31 social media, celebrities/social media influencers, family/friends; Tables S5, S10-S13). Compared  
32 with those 'living comfortably' participants in more difficult financial situations were less likely to trust  
33 the seven sources most closely aligned with scientific or clinical expertise (doctors/nurses/other  
34 healthcare professionals, pharmacists, NHS, drug companies, UK government, scientists, WHO;  
35 Tables S2-S6, S8, S9). Similarly, participants from minority ethnic groups were less likely to trust  
36 scientific or clinical sources than White British participants (Tables S2-S4, S8, S9). Whilst lack of  
37 trust in faith or community leaders was low overall, Asian/Asian British participants were more likely  
38 than White British to trust faith/community leaders (AOR=4.82, 95%CI (2.76, 8.42),  $p < 0.001$ ) as  
39 were Black/Black British participants (AOR=4.52, 95%CI (2.04, 9.99),  $p < 0.001$ ).  
40  
41  
42  
43  
44  
45  
46  
47  
48

### 49 **Views on prioritisation**

50 Nine in ten participants rated healthcare professionals as highest priority for vaccination. Over 70%  
51 indicated those with serious health conditions/heightened vulnerability to COVID-19, care home  
52 workers and residents, and over 80s should be 'one of the first' to be vaccinated (Table 4). Priority  
53 was also given to social care workers, schoolteachers, and those directly working with the public.  
54 Over a third considered each of these groups should be 'one of the first' to be vaccinated, and 70%  
55 or more rated them in the top two priority levels. People aged under 18 were rated as lowest priority,  
56 and 6% considered the vaccine should not be offered to this group.  
57  
58  
59  
60

## Importance of second dose

Nearly all participants (96%, n=4,761) considered it 'very' or 'fairly important' to receive the second vaccine dose. This increased to 99% (n=4,096) amongst those who intended to accept the vaccine.

## Discussion

### Principal findings

Overall, acceptance was high, with 83% having received or intending to have the vaccine. While this suggests acceptance will be high in future vaccination programmes, it may change if perceived vulnerability to or severity of infection, vaccine efficacy, or side-effects alters. Acceptance increased with age and education, and if invited for vaccination. It decreased with financial hardship, and among non-White British ethnicities and those with unconfirmed past COVID-19. Clinical and scientific information was most trusted, with sociodemographic differences for different sources. Policy on a second dose and vaccination priority groups<sup>1</sup> was supported.

### Comparison with other studies

We confirmed lower acceptance in younger groups;<sup>6-8,10,11</sup> acceptance was higher if invited for vaccination, a finding observed for other vaccines in other populations,<sup>22</sup> and emphasising the importance of ensuring vaccine invitations are issued, using appropriate language with translations if necessary. Confirmation of lower acceptance in non-White British ethnicities.<sup>5,6,9,23</sup> is concerning given increased risk of infection and poorer outcomes.<sup>24</sup> We confirmed lower acceptance in those with lower educational attainment and greater financial hardship,<sup>6,8-10,12,25</sup> leaving these groups at risk of infection and increasing likelihood of emergence of variants.<sup>26</sup>

Those with unconfirmed but suspected COVID-19 had lower acceptance. This suggests infection is thought to confer immunity, or recovery fosters a perception of decreased severity. However, past infection does not guarantee protection and people may still be infectious.<sup>27,28</sup> Messaging should target those with prior infection.

There are other implications for communications. While high acceptance suggests communications are effective, identifying barriers in hesitant groups is a priority for developing interventions.<sup>3,15,18,29</sup> Trusted information sources are needed. The most trusted were the NHS, healthcare professionals, and scientific and medical advisers. This suggests that healthcare professionals have a central role in promoting vaccination in initiatives and during consultations. That government and media are less trusted has implications for acceptance.<sup>7,8,25,30</sup> Without sophisticated tailoring and evaluation, social media and celebrities may fail to promote vaccination; initiatives using ethnic minority celebrities and opinion leaders show promise.<sup>16</sup>

Differences in trust varied by socio-demographics. Compared with White British participants, other ethnicities had lower trust in healthcare and scientific sources. Although trust in faith/community leaders was low, it was higher in Asian and Black British participants, suggesting a role for these

1  
2  
3 leaders.<sup>15</sup> Those with lower educational attainment or financial hardship had lower trust in  
4 healthcare and scientific sources. Those with no qualifications had higher trust in media and  
5 family/friends. This suggests a need for a mix of sources for these groups. Mainstream media may  
6 have a role to play, despite lower trust.<sup>25</sup>  
7

8  
9 Reassuringly for further campaigns, prioritisation was considered acceptable and there was support  
10 for additional prioritisation of schoolteachers and others in direct contact with the public. As planning  
11 begins for further vaccination, careful communication regarding prioritisation should continue. We  
12 found high support for a second dose, suggesting the UK's decision to extend the period between  
13 doses has not dented public confidence.  
14

### 15 16 17 **Strengths and limitations**

18  
19 Strengths include the large probability-based nationally representative sample, ability to analyse by  
20 ethnicity and surveying during vaccine roll-out. Our findings can be generalised to GB's adult  
21 population, however global contexts for COVID-19 and vaccination vary. Although not generalisable  
22 to them, the findings are still informative for other countries. The study has limitations. As it is cross-  
23 sectional, we cannot infer causality; although we included variables likely to be important in vaccine  
24 acceptance, these results are exploratory. Our qualitative studies will deepen understanding of  
25 associations. A survey repeated when COVID-19 cases and deaths are low, and without lockdown,  
26 might yield different responses. We did not survey individuals who are institutionalised (e.g.,  
27 prisoners), notably difficult to reach (e.g., homeless), or those not speaking English (therefore, our  
28 ethnic minority sample may underrepresent certain views); specific surveys are needed for these  
29 groups. We investigated vaccination intention. Actual uptake may be lower, although it is likely that  
30 factors associated with intention will influence uptake.  
31  
32

### 33 34 35 **Conclusions**

36  
37  
38 COVID-19 vaccination acceptance is high in GB. Targeted engagement is needed to address  
39 hesitancy in non-White British ethnic groups, those with lower education, those younger, those with  
40 greater financial hardship and those with unconfirmed but suspected past infection. Healthcare  
41 professionals and scientific advisors should lead communications and tailoring is needed. Work is  
42 needed to rebuild trust in government information. There is high support for having the second  
43 vaccine dose. Views of vaccine prioritisation are mostly consistent with UK official policy but there  
44 was support for prioritising additional groups and careful communication around vaccination  
45 prioritisation should continue.  
46  
47  
48  
49  
50  
51  
52  
53  
54  
55  
56  
57  
58  
59  
60

**Contributors:**

MS, CJ, HEB, KH, and AMM conceived the study, supported by AF, DE, and AM. MS, CJ, KA, HB, and AMM designed the questionnaire, supported by MU, AF, DE, AM, and KH. CJ and AMM acquired and analysed the data, which was interpreted by MS, CJ, HB, MU, KH and AMM. MS and AMM drafted the manuscript supported by CJ, HB, MU, and KH. KA, HB, MU, and KH critically revised the article, supported by MS, CJ, AF, DE, AM, and AMM. All authors read the final version of the manuscript and gave approval for it to be published. AMM, CJ, and MS had access to the data in the study and take responsibility for the integrity of the data and the accuracy of the data analysis. The corresponding author attests that all listed authors meet authorship criteria and that no others meeting the criteria have been omitted. MS is the guarantor.

**Public and Patient Involvement:**

The questionnaire was cognitively tested by members of the public to ensure understandability.

**Ethics approval:**

The study received ethical approval from NatCen's Research Ethics Committee (ID P14307). Participants gave informed consent before taking part.

**Transparency declaration:**

The lead author and manuscript's guarantor (MS) affirms that the manuscript is an honest, accurate, and transparent account of the study being reported; that no important aspects of the study have been omitted; and that any discrepancies from the study as originally planned have been explained.

**Role of the funding source:**

The OPTIMising general public Uptake of a COVID-19 vaccine (OPTIMUM) study was supported by a UK Research & Innovation (UKRI) Ideas to Address COVID-19 award (no. ES/V012851/1). The funder had no role in the study design; in the collection, analysis, and interpretation of data; in the writing of the report; and in the decision to submit the article for publication. All researchers were independent from the funder and all authors had full access to all of the data (including statistical reports and tables) in the study and can take responsibility for the integrity of the data and the accuracy of the data analysis.

**Dissemination to participants and related patient and public communities:**

We do not plan to disseminate study results to individual study participants, however findings from the OPTIMUM study will be shared with the public via press releases, social media and interviews, and lay-audience briefing papers.

**Data sharing:**

After completion of the study, the survey dataset will be deposited in the UK Data Archive.

**Competing interests:**

All authors have completed the ICMJE uniform disclosure form at [www.icmje.org/coi\\_disclosure.pdf](http://www.icmje.org/coi_disclosure.pdf) and declare: no support from any organisation for the submitted work; KH has received another UK

1  
2  
3 Research and Innovation (Economic and Social Research Council) grant on the impact of COVID-  
4 19; no other relationships or activities that could appear to have influenced the submitted work.

5  
6 **Acknowledgments:**

7  
8 We thank the questionnaire development and testing and survey and data delivery teams at NatGen  
9 for their work on the survey, and Professor Mark Petticrew at the London School of Hygiene &  
10 Tropical Medicine for acting as adviser to the study.  
11  
12  
13  
14  
15  
16  
17  
18  
19  
20  
21  
22  
23  
24  
25  
26  
27  
28  
29  
30  
31  
32  
33  
34  
35  
36  
37  
38  
39  
40  
41  
42  
43  
44  
45  
46  
47  
48  
49  
50  
51  
52  
53  
54  
55  
56  
57  
58  
59  
60

For peer review only

## References

- 1 UK Government Department of Health and Social Care. Joint Committee on Vaccination and  
2 Immunisation: advice on priority groups for COVID-19 vaccination, 30 December 2020. Jan 6, 2021.  
3 [https://www.gov.uk/government/publications/priority-groups-for-coronavirus-covid-19-vaccination-  
4 advice-from-the-jcvi-30-december-2020/joint-committee-on-vaccination-and-immunisation-advice-  
5 on-priority-groups-for-covid-19-vaccination-30-december-2020](https://www.gov.uk/government/publications/priority-groups-for-coronavirus-covid-19-vaccination-advice-from-the-jcvi-30-december-2020/joint-committee-on-vaccination-and-immunisation-advice-on-priority-groups-for-covid-19-vaccination-30-december-2020).
- 6 2 MacDonald NE, SAGE Working Group on Vaccine Hesitancy. Vaccine hesitancy: definition, scope  
7 and determinants. *Vaccine* 2015;33:4161-4.
- 8 3 Larson HJ, Jarrett C, Eckersberger E, Smith DMD, Paterson P. Understanding vaccine hesitancy  
9 around vaccines and vaccination from a global perspective: a systematic review of published  
10 literature, 2007-2012. *Vaccine* 2014;32:2150-9.
- 11 4 Lane S, MacDonald NE, Marti M, Dumolard L. Vaccine hesitancy around the globe: analysis of  
12 three years of WHO/UNICEF Joint Reporting Form data—2015–2017. *Vaccine* 2018;36:3861-7.
- 13 5 Bell S, Clarke R, Mounier-Jack S, Walker JL, Paterson P. Parents' and guardians' views on the  
14 acceptability of a future COVID-19 vaccine: A multi-methods study in England. *Vaccine*  
15 2020;38:7789-98.
- 16 6 Freeman D, Loe BS, Chadwick A, Vaccari C, Waite F, Rosebrock L, et al. COVID-19 vaccine  
17 hesitancy in the UK: the Oxford coronavirus explanations, attitudes, and narratives survey (Oceans)  
18 II. *Psychol Med* 2020; published online Dec 11. <https://dx.doi.org/10.1017/S0033291720005188>.
- 19 7 Lazarus JV, Ratzan SC, Palayew A, Gostin LO, Larson HJ, Rabin K, et al. Extended data fig. 1: 'If  
20 a COVID-19 vaccine is proven safe and effective and is available, I will take it'. In: A global survey of  
21 potential acceptance of a COVID-19 vaccine. *Nat Med* 2021;27:225-8.  
22 <https://doi.org/10.1038/s41591-020-1124-9>.
- 23 8 Murphy J, Vallières F, Bentall RP, Shevlin M, McBride O, Hartman TK, et al. Psychological  
24 characteristics associated with COVID-19 vaccine hesitancy and resistance in Ireland and the  
25 United Kingdom. *Nat Commun* 2021;12:29.
- 26 9 Robertson E, Reeve KS, Niedzwiedz CL, Moore J, Blake M, Green M, et al. Predictors of COVID-  
27 19 vaccine hesitancy in the UK household longitudinal study. *Brain Behav Immun* 2021;94:41-50.
- 28 10 Paul E, Steptoe A, Fancourt D. Attitudes towards vaccines and intention to vaccinate against  
29 COVID-19: Implications for public health communications. *Lancet Reg Health Eur* 2021;1:100012.  
30 <https://doi.org/10.1016/j.lanepe.2020.100012>
- 31 11 Sherman SM, Smith LE, Sim J, Amlôt R, Cutts M, Dasch H, et al. COVID-19 vaccination  
32 intention in the UK: results from the COVID-19 Vaccination Acceptability Study (CoVAccS), a  
33 nationally representative cross-sectional survey. *Hum Vaccin Immunother* 2020;26:1-10.



- 1  
2  
3 12 Williams L, Flowers P, McLeod J, Young D, Rollins L. The Catalyst Project Team. Social  
4 patterning and stability of intention to accept a COVID-19 vaccine in Scotland: will those most at risk  
5 accept a vaccine? *Vaccines (Basel)* 2021;9:17.  
6  
7  
8 13 Office for National Statistics. Coronavirus (COVID-19) latest insights. Apr 16, 2021.  
9 [https://www.ons.gov.uk/peoplepopulationandcommunity/healthandsocialcare/conditionsanddiseases](https://www.ons.gov.uk/peoplepopulationandcommunity/healthandsocialcare/conditionsanddiseases/articles/coronaviruscovid19/latestinsights#vaccinations)  
10 [/articles/coronaviruscovid19/latestinsights#vaccinations](https://www.ons.gov.uk/peoplepopulationandcommunity/healthandsocialcare/conditionsanddiseases/articles/coronaviruscovid19/latestinsights#vaccinations).  
11  
12  
13 14 Mahase E. Covid-19: Booster vaccine to be rolled out in autumn as UK secures 60m more Pfizer  
14 doses. *BMJ* 2021;373:n1116.  
15  
16 15 Razai MS, Chaudhry UAR, Doerholt K, Bauld L, Majeed A. Covid-19 vaccination hesitancy. *BMJ*  
17 2021;373:n1138.  
18  
19 16 Mohdin A. BAME groups urged to have Covid vaccine in UK TV ad campaign. *The Guardian*,  
20 Feb 18, 2021. [https://www.theguardian.com/world/2021/feb/18/bame-groups-urged-to-have-covid-](https://www.theguardian.com/world/2021/feb/18/bame-groups-urged-to-have-covid-vaccine-in-uk-tv-ad-campaign)  
21 [vaccine-in-uk-tv-ad-campaign](https://www.theguardian.com/world/2021/feb/18/bame-groups-urged-to-have-covid-vaccine-in-uk-tv-ad-campaign).  
22  
23  
24 17 Sewell HF, Robertson JFR, Stewart M, Kendrick D, Bird SM. Revisiting the UK's strategy for  
25 delaying the second dose of the Pfizer covid-19 vaccine. Jan 20, 2021.  
26 [https://blogs.bmj.com/bmj/2021/01/20/revisiting-the-uks-strategy-for-delaying-the-second-dose-of-](https://blogs.bmj.com/bmj/2021/01/20/revisiting-the-uks-strategy-for-delaying-the-second-dose-of-the-pfizer-covid-19-vaccine/)  
27 [the-pfizer-covid-19-vaccine/](https://blogs.bmj.com/bmj/2021/01/20/revisiting-the-uks-strategy-for-delaying-the-second-dose-of-the-pfizer-covid-19-vaccine/).  
28  
29  
30 18 World Health Organization Regional Office for Europe. Survey Tool and Guidance. Rapid,  
31 simple, flexible behavioural insights on COVID-19. Copenhagen: WHO Regional Office for Europe;  
32 2020. [https://www.euro.who.int/\\_\\_data/assets/pdf\\_file/0007/436705/COVID-19-survey-tool-and-](https://www.euro.who.int/__data/assets/pdf_file/0007/436705/COVID-19-survey-tool-and-guidance.pdf?ua=1)  
33 [guidance.pdf?ua=1](https://www.euro.who.int/__data/assets/pdf_file/0007/436705/COVID-19-survey-tool-and-guidance.pdf?ua=1).  
34  
35  
36 19 Gallup. Ch 5 Attitudes to vaccines. In: Gallup. Wellcome Global Monitor. How does the world feel  
37 about science and health? London: Wellcome Trust, 2019: 104-25.  
38 <https://cms.wellcome.org/sites/default/files/wellcome-global-monitor-2018.pdf>.  
39  
40  
41 20 Collins D. Cognitive Interviewing Practice. London: SAGE Publications Ltd, 2014.  
42  
43 21 Jessop C. The NatCen Panel: developing an open probability-based mixed-mode panel in Great  
44 Britain. *Soc Res Pract* 2018;6:2-14. [https://the-](https://the-sra.org.uk/Common/Uploaded%20files/Social%20Research%20Practice%20Journal/social-research-practice-journal-issue-06-summer-2018.pdf)  
45 [sra.org.uk/Common/Uploaded%20files/Social%20Research%20Practice%20Journal/social-](https://the-sra.org.uk/Common/Uploaded%20files/Social%20Research%20Practice%20Journal/social-research-practice-journal-issue-06-summer-2018.pdf)  
46 [research-practice-journal-issue-06-summer-2018.pdf](https://the-sra.org.uk/Common/Uploaded%20files/Social%20Research%20Practice%20Journal/social-research-practice-journal-issue-06-summer-2018.pdf).  
47  
48  
49 22 Jacobson Vann JC, Jacobson RM, Coyne-Beasley T, Asafu-Adjei JK, Szilagyi PG. Patient  
50 reminder and recall interventions to improve immunization rates. *Cochrane Database Syst Rev*  
51 2018;1:CD003941.  
52  
53  
54 23 Thorneloe R, Wilcockson H, Lamb M, Jordan CH, Arden M. Willingness to receive a COVID-19  
55 vaccine among adults at high-risk of COVID-19: a UK-wide survey. *PsyArXiv* 2020; published online  
56 Jul 20. <https://psyarxiv.com/fs9wk> (preprint).  
57  
58  
59 24 Mathur R, Rentsch CT, Morton CE, Hulme WJ, Schultze A, MacKenna B, et al. Ethnic  
60 differences in SARS-CoV-2 infection and COVID-19-related hospitalisation, intensive care unit

1  
2  
3 admission, and death in 17 million adults in England: an observational cohort study using the  
4 OpenSAFELY platform. *Lancet*. 2021;397:1711-24.

5  
6 25 Allington D, McAndrew S, Moxham-Hall V, Duffy B. Coronavirus conspiracy suspicions, general  
7 vaccine attitudes, trust and coronavirus information source as predictors of vaccine hesitancy  
8 among UK residents during the COVID-19 pandemic. *Psychol Med* 2021; published online April 12.  
9 <https://doi.org/10.1017/s0033291721001434>

10  
11 26 Sah P, Vilches TN, Moghadas SM, Fitzpatrick MC, Singer BH, Hotez PJ, et al. Accelerated  
12 vaccine rollout is imperative to mitigate highly transmissible COVID-19 variants. *EClinicalMedicine*  
13 2021;35:100865.

14  
15 27 Hansen CH, Michlmayr D, Gubbels SM, Mølbak K, Ethelberg S. Assessment of protection  
16 against reinfection with SARS-CoV-2 among 4 million PCR-tested individuals in Denmark in 2020: a  
17 population-level observational study. *Lancet* 2021;397:1204-12.

18  
19 28 Hall VJ, Foulkes S, Charlett A, Atti A, Monk EJM, Simmons R, et al. SARS-CoV-2 infection rates  
20 of antibody-positive compared with antibody-negative health-care workers in England: a large,  
21 multicentre, prospective cohort study (SIREN). *Lancet* 2021;397:1459-69.

22  
23 29 Lockyer B, Islam S, Rahman A, Dickerson J, Pickett K, Sheldon T, et al. Understanding COVID-  
24 19 misinformation and vaccine hesitancy in context: Findings from a qualitative study involving  
25 citizens in Bradford, UK. *Health Expect* 2021; published online May 4.  
26 <https://dx.doi.org/10.1111/hex.13240>

27  
28 30 Williams L, Gallant AJ, Rasmussen S, Brown Nicholls LA, Cogan N, et al. Towards intervention  
29 development to increase the uptake of COVID-19 vaccination among those at high risk: Outlining  
30 evidence-based and theoretically informed future intervention content. *Br J Health Psychol*  
31 2020;25:1039-54.

**Table 1** Sample characteristics

|                                                                          | Unweighted |       | Weighted |       |
|--------------------------------------------------------------------------|------------|-------|----------|-------|
|                                                                          | n          | %     | n        | %     |
| <b>Age</b>                                                               |            |       |          |       |
| 18-29                                                                    | 464        | 9.4%  | 824      | 16.7% |
| 30-39                                                                    | 772        | 15.6% | 852      | 17.3% |
| 40-49                                                                    | 848        | 17.1% | 806      | 16.3% |
| 50-59                                                                    | 904        | 18.3% | 867      | 17.6% |
| 60-69                                                                    | 1011       | 20.4% | 711      | 14.4% |
| 70-79                                                                    | 773        | 15.6% | 657      | 13.3% |
| 80+                                                                      | 178        | 3.6%  | 218      | 4.4%  |
| <b>Gender</b>                                                            |            |       |          |       |
| Male                                                                     | 2136       | 42.9% | 2402     | 48.3% |
| Female                                                                   | 2830       | 56.9% | 2567     | 51.6% |
| Other                                                                    | 10         | 0.2%  | 7        | 0.1%  |
| <b>Ethnicity</b>                                                         |            |       |          |       |
| White British                                                            | 4261       | 86.3% | 3999     | 81.2% |
| Any other White background                                               | 319        | 6.5%  | 335      | 6.8%  |
| Mixed or multiple ethnic groups                                          | 64         | 1.3%  | 100      | 2.0%  |
| Asian or Asian British                                                   | 164        | 3.3%  | 306      | 6.2%  |
| Black or Black British                                                   | 67         | 1.4%  | 101      | 2.1%  |
| Other                                                                    | 62         | 1.3%  | 81       | 1.6%  |
| <b>Country</b>                                                           |            |       |          |       |
| England                                                                  | 4369       | 87.9% | 4291     | 86.3% |
| Scotland                                                                 | 390        | 7.8%  | 442      | 8.9%  |
| Wales                                                                    | 212        | 4.3%  | 237      | 4.8%  |
| <b>Urban/rural status<sup>#</sup></b>                                    |            |       |          |       |
| Urban                                                                    | 3789       | 76.2% | 4006     | 80.6% |
| Rural                                                                    | 1182       | 23.8% | 965      | 19.4% |
| <b>Highest educational qualification</b>                                 |            |       |          |       |
| Degree or equivalent, and above                                          | 2503       | 50.4% | 2077     | 41.8% |
| A levels or vocational level 3 or equivalent and above, but below degree | 1005       | 20.2% | 1131     | 22.8% |
| Other qualifications below A levels or vocational level 3 or equivalent  | 788        | 15.9% | 838      | 16.9% |
| Other qualification                                                      | 256        | 5.2%  | 304      | 6.1%  |
| No qualifications                                                        | 416        | 8.4%  | 618      | 12.4% |
| <b>Subjective Financial Status</b>                                       |            |       |          |       |
| Living comfortably                                                       | 1552       | 31.2% | 1289     | 26.0% |
| Doing alright                                                            | 2028       | 40.8% | 2035     | 40.9% |
| Just about getting by                                                    | 975        | 19.6% | 1132     | 22.8% |
| Finding it quite difficult                                               | 271        | 5.5%  | 337      | 6.8%  |
| Finding it very difficult                                                | 142        | 2.9%  | 175      | 3.5%  |
| <b>COVID-19 Status</b>                                                   |            |       |          |       |
| Diagnosed with COVID-19                                                  | 241        | 4.8%  | 294      | 5.9%  |
| Think definitely had COVID-19                                            | 140        | 2.8%  | 172      | 3.5%  |
| Think probably had COVID-19                                              | 710        | 14.3% | 755      | 15.2% |

|                                   |      |       |      |       |
|-----------------------------------|------|-------|------|-------|
| Think probably not had COVID-19   | 1945 | 39.1% | 1880 | 37.8% |
| Think definitely not had COVID-19 | 1393 | 28.0% | 1305 | 26.2% |
| Don't know if had COVID-19        | 547  | 11.0% | 566  | 11.4% |

# England and Wales, based on Office for National Statistics (ONS) definition of urban as population greater than 10,000.  
Scotland based on Scottish Government definition of urban as population greater than 3,000.

For peer review only

**Table 2** Association between vaccine acceptance and sociodemographic variables – (a) bivariate results and (b) multivariate logistic regression.

|                                             | (a) Bivariate associations between vaccine acceptance and socio-demographics<br>% Accepted/Intend to Accept (weighted)<br>$\chi^2$ test for differences by demographics |      |               |       | (b) Logistic regression of vaccine acceptance<br>1 = Accepted/Intend to Accept (4294), 0 = Uncertain/Refused/Intend to Refuse (600) |      |              |              |       |
|---------------------------------------------|-------------------------------------------------------------------------------------------------------------------------------------------------------------------------|------|---------------|-------|-------------------------------------------------------------------------------------------------------------------------------------|------|--------------|--------------|-------|
|                                             | n                                                                                                                                                                       | %    | $\chi^2$ (df) | P     | N                                                                                                                                   | AOR* | 95% CI Lower | 95% CI Upper | P     |
| <b>Gender</b>                               |                                                                                                                                                                         |      | 2.154 (2)     | .341  |                                                                                                                                     |      |              |              | 0.085 |
| Male                                        | 2012                                                                                                                                                                    | 83.8 |               |       | 2097                                                                                                                                | ref  |              |              |       |
| Female                                      | 2117                                                                                                                                                                    | 82.5 |               |       | 2788                                                                                                                                | 0.82 | 0.67         | 0.99         | 0.036 |
| Other                                       | 5                                                                                                                                                                       | 71.4 |               |       | 9                                                                                                                                   | 0.47 | 0.09         | 2.45         | 0.369 |
| <b>Age</b>                                  |                                                                                                                                                                         |      | 274.733 (6)   | <.001 |                                                                                                                                     |      |              |              | <.001 |
| 18-29                                       | 613                                                                                                                                                                     | 74.4 |               |       | 459                                                                                                                                 | ref  |              |              |       |
| 30-39 v 18-29                               | 618                                                                                                                                                                     | 72.5 |               |       | 761                                                                                                                                 | 0.89 | 0.66         | 1.20         | .448  |
| 40-49 v 18-39                               | 640                                                                                                                                                                     | 79.3 |               |       | 835                                                                                                                                 | 1.43 | 1.12         | 1.83         | .004  |
| 50-59 v 18-49                               | 745                                                                                                                                                                     | 85.9 |               |       | 896                                                                                                                                 | 1.92 | 1.49         | 2.46         | <.001 |
| 60-69 v 18-59                               | 659                                                                                                                                                                     | 92.7 |               |       | 1003                                                                                                                                | 3.21 | 2.37         | 4.34         | <.001 |
| 70-79 v 18-69                               | 629                                                                                                                                                                     | 95.7 |               |       | 763                                                                                                                                 | 3.31 | 2.22         | 4.95         | <.001 |
| 80+ v 18-79                                 | 209                                                                                                                                                                     | 95.9 |               |       | 177                                                                                                                                 | 2.19 | 0.92         | 5.21         | .078  |
| <b>Education/Highest qualification</b>      |                                                                                                                                                                         |      | 56.056 (4)    | <.001 |                                                                                                                                     |      |              |              | <.001 |
| No qualifications                           | 495                                                                                                                                                                     | 80.1 |               |       | 411                                                                                                                                 | ref  |              |              |       |
| Degree or equivalent and above              | 1811                                                                                                                                                                    | 87.2 |               |       | 2454                                                                                                                                | 3.03 | 2.17         | 4.23         | <.001 |
| A levels / Vocational level 3 or equivalent | 909                                                                                                                                                                     | 80.4 |               |       | 990                                                                                                                                 | 1.80 | 1.27         | 2.55         | <.001 |
| Other qual'ns below A level / Voc level 3   | 694                                                                                                                                                                     | 82.7 |               |       | 784                                                                                                                                 | 1.50 | 1.05         | 2.15         | .026  |
| Other qualification                         | 223                                                                                                                                                                     | 73.4 |               |       | 255                                                                                                                                 | 0.90 | 0.58         | 1.39         | .632  |
| <b>Financial Status</b>                     |                                                                                                                                                                         |      | 168.660 (4)   | <.001 |                                                                                                                                     |      |              |              | <.001 |
| Living comfortably                          | 1162                                                                                                                                                                    | 90.1 |               |       | 1533                                                                                                                                | ref  |              |              |       |
| Doing alright                               | 1749                                                                                                                                                                    | 86.0 |               |       | 1998                                                                                                                                | 0.89 | 0.69         | 1.15         | .383  |
| Just about getting by                       | 848                                                                                                                                                                     | 74.9 |               |       | 959                                                                                                                                 | 0.52 | 0.39         | 0.69         | <.001 |
| Finding it quite difficult                  | 261                                                                                                                                                                     | 77.2 |               |       | 266                                                                                                                                 | 0.74 | 0.50         | 1.10         | .139  |
| Finding it very difficult                   | 111                                                                                                                                                                     | 63.4 |               |       | 138                                                                                                                                 | 0.35 | 0.22         | 0.55         | <.001 |
| <b>Country</b>                              |                                                                                                                                                                         |      | 3.171 (2)     | .205  |                                                                                                                                     |      |              |              | .326  |
| England                                     | 3581                                                                                                                                                                    | 83.5 |               |       | 4302                                                                                                                                | ref  |              |              |       |
| Scotland                                    | 356                                                                                                                                                                     | 80.5 |               |       | 384                                                                                                                                 | 0.82 | 0.59         | 1.13         | .220  |
| Wales                                       | 192                                                                                                                                                                     | 81.0 |               |       | 208                                                                                                                                 | 0.80 | 0.51         | 1.26         | .345  |
| <b>Urban/rural</b>                          |                                                                                                                                                                         |      | 34.517 (1)    | <.001 |                                                                                                                                     |      |              |              |       |
| Urban                                       | 3266                                                                                                                                                                    | 81.5 |               |       | 3729                                                                                                                                | ref  |              |              |       |
| Rural                                       | 863                                                                                                                                                                     | 89.4 |               |       | 1165                                                                                                                                | 1.28 | 1.00         | 1.65         | .051  |
| <b>Ethnicity</b>                            |                                                                                                                                                                         |      | 246.434 (5)   | <.001 |                                                                                                                                     |      |              |              | <.001 |
| White British                               | 3482                                                                                                                                                                    | 87.1 |               |       | 4226                                                                                                                                | ref  |              |              |       |
| Any other white background                  | 254                                                                                                                                                                     | 75.8 |               |       | 318                                                                                                                                 | 0.55 | 0.40         | 0.76         | <.001 |
| Mixed or multiple ethnic groups             | 62                                                                                                                                                                      | 61.4 |               |       | 62                                                                                                                                  | 0.39 | 0.21         | 0.71         | .002  |
| Asian or Asian British                      | 188                                                                                                                                                                     | 61.4 |               |       | 161                                                                                                                                 | 0.41 | 0.28         | 0.61         | <.001 |
| Black or Black British                      | 59                                                                                                                                                                      | 58.4 |               |       | 67                                                                                                                                  | 0.25 | 0.14         | 0.43         | <.001 |
| Other                                       | 59                                                                                                                                                                      | 72.8 |               |       | 60                                                                                                                                  | 0.42 | 0.23         | 0.79         | .007  |
| <b>Whether been offered vaccine</b>         |                                                                                                                                                                         |      | 45.924 (1)    | <.001 |                                                                                                                                     |      |              |              |       |
| No                                          | 3479                                                                                                                                                                    | 81.6 |               |       | 4227                                                                                                                                | ref  |              |              |       |
| Yes                                         | 658                                                                                                                                                                     | 91.9 |               |       | 667                                                                                                                                 | 1.73 | 1.24         | 2.43         | .001  |
| <b>COVID-19 Status</b>                      |                                                                                                                                                                         |      | 72.865 (4)    | <.001 |                                                                                                                                     |      |              |              | <.001 |

|                                                      |      |      |  |  |  |                                                                                                                                                                                                                                                           |      |      |      |       |
|------------------------------------------------------|------|------|--|--|--|-----------------------------------------------------------------------------------------------------------------------------------------------------------------------------------------------------------------------------------------------------------|------|------|------|-------|
| Think probably or definitely <u>not</u> had COVID-19 | 2741 | 86.1 |  |  |  | 3288                                                                                                                                                                                                                                                      | ref  |      |      |       |
| Diagnosed with COVID-19                              | 218  | 74.4 |  |  |  | 240                                                                                                                                                                                                                                                       | 0.89 | 0.60 | 1.33 | .575  |
| Think definitely had COVID-19                        | 118  | 68.2 |  |  |  | 140                                                                                                                                                                                                                                                       | 0.40 | 0.26 | 0.60 | <.001 |
| Think probably had COVID-19                          | 598  | 79.1 |  |  |  | 691                                                                                                                                                                                                                                                       | 0.71 | 0.56 | 0.91 | .006  |
| Don't Know if had COVID-19                           | 462  | 81.5 |  |  |  | 535                                                                                                                                                                                                                                                       | 0.73 | 0.55 | 0.97 | .031  |
|                                                      |      |      |  |  |  | Hosmer & Lemeshow $\chi^2= 7.444$ , $df=8$ , $p=0.490$ .<br>Final model $\chi^2=497.429$ , $df=29$ , $p<0.001$<br>Nagelkerke = 0.184<br>Cases correctly classified: 88.1%.<br>84 cases excluded due to missing data on one or more independent variables. |      |      |      |       |

\* adjusted for all other variables in the model, AOR, adjusted odds ratio; ref, reference category; 95%CI, 95% confidence interval

**Table 3** Trust in potential sources of information on COVID-19 vaccine

| Source:                                                   | Level of Trust (trust completely [1]...not at all [5]) |       |                  |       |              |       |                 |       |                |       | Mean | Std Dev |
|-----------------------------------------------------------|--------------------------------------------------------|-------|------------------|-------|--------------|-------|-----------------|-------|----------------|-------|------|---------|
|                                                           | Completely (1)                                         |       | A great deal (2) |       | Somewhat (3) |       | Very little (4) |       | Not at all (5) |       |      |         |
|                                                           | n                                                      | %     | n                | %     | n            | %     | n               | %     | n              | %     |      |         |
| The NHS                                                   | 2084                                                   | 41.9% | 1902             | 38.3% | 701          | 14.1% | 155             | 3.1%  | 127            | 2.5%  | 1.86 | 0.95    |
| Doctors, nurses or other healthcare professionals         | 1918                                                   | 38.6% | 2092             | 42.1% | 714          | 14.4% | 154             | 3.1%  | 90             | 1.8%  | 1.87 | 0.90    |
| Scientific and medical advisers                           | 1798                                                   | 36.2% | 2101             | 42.3% | 792          | 15.9% | 160             | 3.2%  | 121            | 2.4%  | 1.94 | 0.93    |
| The World Health Organisation (WHO)                       | 1313                                                   | 26.4% | 2016             | 40.6% | 1070         | 21.6% | 310             | 6.2%  | 256            | 5.1%  | 2.23 | 1.07    |
| Pharmacists                                               | 999                                                    | 20.1% | 1973             | 39.7% | 1434         | 28.8% | 341             | 6.9%  | 226            | 4.5%  | 2.36 | 1.02    |
| The UK Government                                         | 654                                                    | 13.2% | 1542             | 31.1% | 1739         | 35.1% | 614             | 12.4% | 402            | 8.1%  | 2.71 | 1.10    |
| Scottish Govt/Welsh Assembly <sup>a</sup>                 | 118                                                    | 17.4% | 189              | 27.9% | 207          | 30.5% | 88              | 13.1% | 75             | 11.1% | 2.72 | 1.21    |
| Drug companies who manufacture vaccines                   | 406                                                    | 8.2%  | 1064             | 21.4% | 2065         | 41.6% | 771             | 15.5% | 661            | 13.3% | 3.04 | 1.11    |
| Family and friends                                        | 343                                                    | 6.9%  | 876              | 17.6% | 2230         | 44.9% | 977             | 19.7% | 542            | 10.9% | 3.10 | 1.04    |
| The media (e.g. newspapers, magazines, television, radio) | 86                                                     | 1.7%  | 302              | 6.1%  | 1567         | 31.5% | 1433            | 28.9% | 1580           | 31.8% | 3.83 | 1.00    |
| Faith or community leaders                                | 131                                                    | 2.6%  | 124              | 2.5%  | 619          | 12.5% | 827             | 16.7% | 3264           | 65.7% | 4.40 | 0.98    |
| Social media (e.g. Twitter, Facebook, Instagram etc)      | 65                                                     | 1.3%  | 69               | 1.4%  | 506          | 10.2% | 1267            | 25.5% | 3056           | 61.6% | 4.45 | 0.83    |
| Celebrities and social media influencers                  | 60                                                     | 1.2%  | 71               | 1.4%  | 493          | 9.9%  | 1175            | 23.6% | 3170           | 63.8% | 4.47 | 0.82    |

Base: All participants (weighted). Missing cases range from n=3 to n=27. <sup>a</sup>Base: all participants in Scotland or Wales, n=679 (weighted). List order was randomised for each participant.

**Table 4** Views on priority groups for vaccination: who should be first and last groups vaccinated

|                                                                                  | Should not be offered |      | Priority of being offered <sup>a</sup> |       |      |       |      |       |      |       |                     |       | Mean <sup>b</sup> | Std Dev |
|----------------------------------------------------------------------------------|-----------------------|------|----------------------------------------|-------|------|-------|------|-------|------|-------|---------------------|-------|-------------------|---------|
|                                                                                  |                       |      | One of the first (1)                   |       | (2)  |       | (3)  |       | (4)  |       | One of the last (5) |       |                   |         |
|                                                                                  | n                     | %    | n                                      | %     | n    | %     | n    | %     | n    | %     | n                   | %     |                   |         |
| Doctors, nurses and other healthcare professionals                               | 33                    | 0.7% | 4472                                   | 90.0% | 280  | 5.6%  | 83   | 1.7%  | 15   | 0.3%  | 83                  | 1.7%  | 1.17              | 0.63    |
| People with serious health conditions which mean they are vulnerable to COVID-19 | 35                    | 0.7% | 4017                                   | 80.9% | 671  | 13.5% | 129  | 2.6%  | 35   | 0.7%  | 77                  | 1.6%  | 1.27              | 0.69    |
| Care home workers                                                                | 36                    | 0.7% | 3926                                   | 79.0% | 683  | 13.8% | 197  | 4.0%  | 58   | 1.2%  | 66                  | 1.3%  | 1.31              | 0.72    |
| Residents in a care home                                                         | 47                    | 0.9% | 3593                                   | 72.4% | 734  | 14.8% | 337  | 6.8%  | 123  | 2.5%  | 131                 | 2.6%  | 1.47              | 0.93    |
| People aged 80 or over                                                           | 49                    | 1.0% | 3613                                   | 72.9% | 706  | 14.2% | 304  | 6.1%  | 118  | 2.4%  | 168                 | 3.4%  | 1.48              | 0.96    |
| Social care workers                                                              | 33                    | 0.7% | 2683                                   | 54.0% | 1348 | 27.2% | 683  | 13.8% | 143  | 2.9%  | 75                  | 1.5%  | 1.70              | 0.92    |
| Schoolteachers                                                                   | 47                    | 0.9% | 2098                                   | 42.2% | 1621 | 32.6% | 886  | 17.8% | 223  | 4.5%  | 94                  | 1.9%  | 1.90              | 0.97    |
| People with jobs that involve direct contact with members of the public          | 45                    | 0.9% | 1864                                   | 37.5% | 1603 | 32.3% | 1157 | 23.3% | 228  | 4.6%  | 70                  | 1.4%  | 1.99              | 0.96    |
| People aged 31-50                                                                | 43                    | 0.9% | 154                                    | 3.1%  | 614  | 12.4% | 2096 | 42.2% | 1486 | 30.0% | 568                 | 11.4% | 3.35              | 0.95    |
| People aged 18-30                                                                | 102                   | 2.0% | 123                                    | 2.5%  | 289  | 5.8%  | 943  | 19.0% | 1375 | 27.7% | 2130                | 42.9% | 4.05              | 1.05    |
| People aged under 18                                                             | 282                   | 5.7% | 148                                    | 3.0%  | 253  | 5.1%  | 657  | 13.3% | 831  | 16.8% | 2788                | 56.2% | 4.25              | 1.08    |

Base: All participants (weighted). <sup>a</sup> Missing cases range from n=11 to n=21. <sup>b</sup> Excludes 'should not be offered', missing cases range from n=45 to n=301. List order was randomised for each participant.



## Supplementary material to ‘A national survey of attitudes towards and intentions to vaccinate against COVID-19: implications for communications’.

### Contents

- Table S1 Overall response rate calculation accounting for recruitment onto original panel and panel attrition.
- Table S2 Doctors, nurses or other healthcare professionals – Association between trust in sources of information about COVID-19 vaccine and socio-demographic variables – (a) bivariate results and (b) multivariate logistic regression.
- Table S3 Pharmacists – Association between trust in sources of information about COVID-19 vaccine and socio-demographic variables – (a) bivariate results and (b) multivariate logistic regression.
- Table S4 The NHS – Association between trust in sources of information about COVID-19 vaccine and socio-demographic variables – (a) bivariate results and (b) multivariate logistic regression.
- Table S5 Drug companies who manufacture vaccines – Association between trust in sources of information about COVID-19 vaccine and socio-demographic variables – (a) bivariate results and (b) multivariate logistic regression.
- Table S6 The UK Government – Association between trust in sources of information about COVID-19 vaccine and socio-demographic variables – (a) bivariate results and (b) multivariate logistic regression.
- Table S7 The Scottish/Welsh Government – Association between trust in sources of information about COVID-19 vaccine and socio-demographic variables – (a) bivariate results and (b) multivariate logistic regression.
- Table S8 Scientific and medical advisers – Association between trust in sources of information about COVID-19 vaccine and socio-demographic variables – (a) bivariate results and (b) multivariate logistic regression.
- Table S9 The World Health Organisation (WHO) – Association between trust in sources of information about COVID-19 vaccine and socio-demographic variables – (a) bivariate results and (b) multivariate logistic regression.
- Table S10 The media (e.g. newspapers, magazines, television, radio) – Association between trust in sources of information about COVID-19 vaccine and socio-demographic variables – (a) bivariate results and (b) multivariate logistic regression.
- Table S11 Social media – Association between trust in sources of information about COVID-19 vaccine and socio-demographic variables – (a) bivariate results and (b) multivariate logistic regression.
- Table S12 Celebrities and social media influencers – Association between trust in sources of information about COVID-19 vaccine and socio-demographic variables – (a) bivariate results and (b) multivariate logistic regression.
- Table S13 Family and friends – Association between trust in sources of information about COVID-19 vaccine and socio-demographic variables – (a) bivariate results and (b) multivariate logistic regression.
- Table S14 Faith or community leaders – Association between trust in sources of information about COVID-19 vaccine and socio-demographic variables – (a) bivariate results and (b) multivariate logistic regression.

**Table S1 Overall response rate calculation accounting for recruitment onto original panel and panel attrition.**

| Wave of British Social Attitudes Survey (BSA) from which panel was recruited |            |            |           |                    |
|------------------------------------------------------------------------------|------------|------------|-----------|--------------------|
| Response to initial BSA survey                                               | 2018       | 2019       | 2020      | Total 2018 to 2020 |
| BSA issued                                                                   | 10,270     | 7,956      | 42066     | 60,292             |
| BSA deadwood                                                                 | 1,023      | 684        | 4207      | 5,914              |
| BSA productive                                                               | 3,879      | 3,224      | 3964      | 11,067             |
| BSA response rate                                                            | 42%        | 44%        | 10%       | 20%                |
| <b>Overall response for panel recruitment</b>                                |            |            |           |                    |
| BSA productive                                                               | 3,879      | 3,224      | 3964      | 11,067             |
| Recruited to panel                                                           | 2,412      | 2,104      | 3086      | 7,602              |
| Panel recruitment rate                                                       | 62%        | 65%        | 78%       | 69%                |
| Panel deadwood                                                               | 19         | 7          | 0         | 26                 |
| Panel lost to attrition/inactivity prior to vaccine survey                   | 969        | 673        | 3         | 1645               |
| <b>Panel's response to vaccine survey</b>                                    |            |            |           |                    |
| Issued                                                                       | 1,424      | 1,424      | 3,083     | 5,931              |
| Deadwood                                                                     | 1          | 5          | 0         | 6                  |
| Achieved                                                                     | 1,242      | 1,181      | 2,555     | 4,978              |
| Vaccine survey response rate                                                 | 87%        | 83%        | 83%       | 84%                |
| <b>Overall survey response rate<sup>a</sup></b>                              | <b>13%</b> | <b>16%</b> | <b>7%</b> | <b>9%</b>          |

<sup>a</sup> Response rate accounting for non-response at original point of recruitment (British Social Attitudes Survey 2018, 2019 or 2020) and panel attrition thereafter.

**Table S2 Doctors, nurses or other healthcare professionals – Association between trust in sources of information about COVID-19 vaccine and socio-demographic variables – (a) bivariate results and (b) multivariate logistic regression.**

|                                             | (a) Bivariate associations between socio-demographics and trusting COVID-19 vaccine info from Doctors, nurses or other healthcare professionals |      |               |       | (b) Logistic regression of trust in COVID-19 vaccine info from Doctors, nurses or other healthcare professionals |      |                                                                                                                                                                                                                                                |              |       |
|---------------------------------------------|-------------------------------------------------------------------------------------------------------------------------------------------------|------|---------------|-------|------------------------------------------------------------------------------------------------------------------|------|------------------------------------------------------------------------------------------------------------------------------------------------------------------------------------------------------------------------------------------------|--------------|-------|
|                                             | % Trust completely or a great deal (weighted)<br>$\chi^2$ test for differences by demographics                                                  |      |               |       | 1 = Trust completely or a great deal (4104), 0 = Trust somewhat, very little or not at all (786)                 |      |                                                                                                                                                                                                                                                |              |       |
|                                             | n                                                                                                                                               | %    | $\chi^2$ (df) | P     | N                                                                                                                | AOR* | 95% CI Lower                                                                                                                                                                                                                                   | 95% CI Upper | P     |
| <b>Gender</b>                               |                                                                                                                                                 |      |               |       |                                                                                                                  |      |                                                                                                                                                                                                                                                |              |       |
| Male                                        | 1957                                                                                                                                            | 81.7 | 3.020 (2)     | .221  | 2097                                                                                                             | ref  |                                                                                                                                                                                                                                                |              | .526  |
| Female                                      | 2046                                                                                                                                            | 79.9 |               |       | 2784                                                                                                             | 0.92 | 0.79                                                                                                                                                                                                                                           | 1.08         | .331  |
| Other                                       | 5                                                                                                                                               | 71.4 |               |       | 9                                                                                                                | 0.59 | 0.12                                                                                                                                                                                                                                           | 2.94         | .518  |
| <b>Age</b>                                  |                                                                                                                                                 |      |               |       |                                                                                                                  |      |                                                                                                                                                                                                                                                |              |       |
| 18-29                                       | 649                                                                                                                                             | 78.8 | 53.883 (6)    | <.001 | 459                                                                                                              | ref  |                                                                                                                                                                                                                                                |              | <.001 |
| 30-39 v 18-29                               | 642                                                                                                                                             | 75.7 |               |       | 758                                                                                                              | 0.83 | 0.61                                                                                                                                                                                                                                           | 1.12         | .219  |
| 40-49 v 18-39                               | 629                                                                                                                                             | 78.4 |               |       | 835                                                                                                              | 0.96 | 0.76                                                                                                                                                                                                                                           | 1.22         | .750  |
| 50-59 v 18-49                               | 701                                                                                                                                             | 80.9 |               |       | 896                                                                                                              | 1.18 | 0.95                                                                                                                                                                                                                                           | 1.47         | .133  |
| 60-69 v 18-59                               | 599                                                                                                                                             | 84.2 |               |       | 1004                                                                                                             | 1.40 | 1.12                                                                                                                                                                                                                                           | 1.74         | .003  |
| 70-79 v 18-69                               | 582                                                                                                                                             | 89.0 |               |       | 761                                                                                                              | 1.72 | 1.32                                                                                                                                                                                                                                           | 2.24         | <.001 |
| 80+ v 18-79                                 | 181                                                                                                                                             | 83.0 |               |       | 177                                                                                                              | 1.32 | 0.83                                                                                                                                                                                                                                           | 2.11         | .240  |
| <b>Education/Highest qualification</b>      |                                                                                                                                                 |      |               |       |                                                                                                                  |      |                                                                                                                                                                                                                                                |              |       |
| No qualifications                           | 440                                                                                                                                             | 71.7 | 91.917 (4)    | <.001 | 408                                                                                                              | ref  |                                                                                                                                                                                                                                                |              | <.001 |
| Degree or equivalent and above              | 1775                                                                                                                                            | 85.7 |               |       | 2454                                                                                                             | 2.64 | 2.00                                                                                                                                                                                                                                           | 3.48         | <.001 |
| A levels / Vocational level 3 or equivalent | 906                                                                                                                                             | 80.0 |               |       | 990                                                                                                              | 1.87 | 1.39                                                                                                                                                                                                                                           | 2.51         | <.001 |
| Other qual'ns below A level / Voc level 3   | 673                                                                                                                                             | 80.5 |               |       | 783                                                                                                              | 1.70 | 1.25                                                                                                                                                                                                                                           | 2.29         | .001  |
| Other qualification                         | 210                                                                                                                                             | 69.1 |               |       | 255                                                                                                              | 0.97 | 0.67                                                                                                                                                                                                                                           | 1.40         | .872  |
| <b>Financial Status</b>                     |                                                                                                                                                 |      |               |       |                                                                                                                  |      |                                                                                                                                                                                                                                                |              |       |
| Living comfortably                          | 1121                                                                                                                                            | 87.2 | 124.251 (4)   | <.001 | 1533                                                                                                             | ref  |                                                                                                                                                                                                                                                |              | <.001 |
| Doing alright                               | 1699                                                                                                                                            | 83.7 |               |       | 1995                                                                                                             | 0.90 | 0.73                                                                                                                                                                                                                                           | 1.10         | .296  |
| Just about getting by                       | 824                                                                                                                                             | 72.9 |               |       | 959                                                                                                              | 0.61 | 0.48                                                                                                                                                                                                                                           | 0.77         | <.001 |
| Finding it quite difficult                  | 247                                                                                                                                             | 73.3 |               |       | 266                                                                                                              | 0.60 | 0.42                                                                                                                                                                                                                                           | 0.84         | .003  |
| Finding it very difficult                   | 116                                                                                                                                             | 66.7 |               |       | 137                                                                                                              | 0.51 | 0.33                                                                                                                                                                                                                                           | 0.78         | .002  |
| <b>Country</b>                              |                                                                                                                                                 |      |               |       |                                                                                                                  |      |                                                                                                                                                                                                                                                |              |       |
| England                                     | 3499                                                                                                                                            | 81.7 | 21.523 (2)    | <.001 | 4299                                                                                                             | ref  |                                                                                                                                                                                                                                                |              | .128  |
| Scotland                                    | 321                                                                                                                                             | 73.0 |               |       | 383                                                                                                              | 0.77 | 0.59                                                                                                                                                                                                                                           | 1.02         | .068  |
| Wales                                       | 183                                                                                                                                             | 77.2 |               |       | 208                                                                                                              | 0.82 | 0.56                                                                                                                                                                                                                                           | 1.20         | .308  |
| <b>Urban/rural</b>                          |                                                                                                                                                 |      |               |       |                                                                                                                  |      |                                                                                                                                                                                                                                                |              |       |
| Urban                                       | 3201                                                                                                                                            | 80.1 | 4.443 (1)     | .035  | 3725                                                                                                             | ref  |                                                                                                                                                                                                                                                |              |       |
| Rural                                       | 802                                                                                                                                             | 83.1 |               |       | 1165                                                                                                             | 0.97 | 0.80                                                                                                                                                                                                                                           | 1.18         | .778  |
| <b>Ethnicity</b>                            |                                                                                                                                                 |      |               |       |                                                                                                                  |      |                                                                                                                                                                                                                                                |              |       |
| White British                               | 3314                                                                                                                                            | 83.0 | 63.871 (5)    | <.001 | 4224                                                                                                             | ref  |                                                                                                                                                                                                                                                |              | <.001 |
| Any other white background                  | 242                                                                                                                                             | 72.7 |               |       | 317                                                                                                              | 0.54 | 0.41                                                                                                                                                                                                                                           | 0.72         | <.001 |
| Mixed or multiple ethnic groups             | 64                                                                                                                                              | 66.0 |               |       | 62                                                                                                               | 0.38 | 0.22                                                                                                                                                                                                                                           | 0.67         | <.001 |
| Asian or Asian British                      | 223                                                                                                                                             | 73.4 |               |       | 160                                                                                                              | 0.53 | 0.36                                                                                                                                                                                                                                           | 0.77         | <.001 |
| Black or Black British                      | 70                                                                                                                                              | 69.3 |               |       | 67                                                                                                               | 0.41 | 0.24                                                                                                                                                                                                                                           | 0.70         | .001  |
| Other                                       | 58                                                                                                                                              | 71.6 |               |       | 60                                                                                                               | 0.56 | 0.30                                                                                                                                                                                                                                           | 1.03         | .060  |
|                                             |                                                                                                                                                 |      |               |       |                                                                                                                  |      | Hosmer & Lemeshow $\chi^2= 10.236$ , df=8, p=0.249.<br>Final model $\chi^2=220.263$ , df=24, p<.001<br>Nagelkerke = 0.075<br>Cases correctly classified: 84.0%.<br>88 cases excluded due to missing data on one or more independent variables. |              |       |

\* adjusted for all other variables in the model, AOR, adjusted odds ratio; ref, reference category; 95% CI, 95% confidence interval.

**Table S3 Pharmacists – Association between trust in sources of information about COVID-19 vaccine and socio-demographic variables – (a) bivariate results and (b) multivariate logistic regression.**

|                                             | (a) Bivariate associations between socio-demographics and trusting COVID-19 vaccine info from Pharmacists<br>% Trust completely or a great deal (weighted)<br>$\chi^2$ test for differences by demographics |      |               |       | (b) Logistic regression of trust in COVID-19 vaccine info from Pharmacists<br>1 = Trust completely or a great deal (3107), 0 = Trust somewhat, very little or not at all (1786)                                                                |      |              |              |       |
|---------------------------------------------|-------------------------------------------------------------------------------------------------------------------------------------------------------------------------------------------------------------|------|---------------|-------|------------------------------------------------------------------------------------------------------------------------------------------------------------------------------------------------------------------------------------------------|------|--------------|--------------|-------|
|                                             | n                                                                                                                                                                                                           | %    | $\chi^2$ (df) | P     | N                                                                                                                                                                                                                                              | AOR* | 95% CI Lower | 95% CI Upper | P     |
| <b>Gender</b>                               |                                                                                                                                                                                                             |      |               |       |                                                                                                                                                                                                                                                |      |              |              |       |
| Male                                        | 1420                                                                                                                                                                                                        | 59.2 | 1.597*        | .474  | 2098                                                                                                                                                                                                                                           | ref  |              |              | .620  |
| Female                                      | 1548                                                                                                                                                                                                        | 60.4 |               |       | 2786                                                                                                                                                                                                                                           | 1.06 | 0.94         | 1.19         | .376  |
| Other                                       | 3                                                                                                                                                                                                           | 42.9 |               |       | 9                                                                                                                                                                                                                                              | 0.78 | 0.21         | 2.95         | .715  |
| <b>Age</b>                                  |                                                                                                                                                                                                             |      |               |       |                                                                                                                                                                                                                                                |      |              |              |       |
| 18-29                                       | 461                                                                                                                                                                                                         | 55.9 | 29.783 (6)    | <.001 | 459                                                                                                                                                                                                                                            | ref  |              |              | .092  |
| 30-39 v 18-29                               | 486                                                                                                                                                                                                         | 57.2 |               |       | 759                                                                                                                                                                                                                                            | 0.98 | 0.77         | 1.24         | .848  |
| 40-49 v 18-39                               | 455                                                                                                                                                                                                         | 56.7 |               |       | 835                                                                                                                                                                                                                                            | 0.96 | 0.80         | 1.16         | .662  |
| 50-59 v 18-49                               | 518                                                                                                                                                                                                         | 59.7 |               |       | 896                                                                                                                                                                                                                                            | 1.18 | 0.99         | 1.39         | .062  |
| 60-69 v 18-59                               | 462                                                                                                                                                                                                         | 65.0 |               |       | 1004                                                                                                                                                                                                                                           | 1.24 | 1.06         | 1.46         | .009  |
| 70-79 v 18-69                               | 428                                                                                                                                                                                                         | 65.1 |               |       | 763                                                                                                                                                                                                                                            | 1.00 | 0.84         | 1.19         | .972  |
| 80+ v 18-79                                 | 144                                                                                                                                                                                                         | 65.8 |               |       | 177                                                                                                                                                                                                                                            | 1.12 | 0.80         | 1.55         | .514  |
| <b>Education/Highest qualification</b>      |                                                                                                                                                                                                             |      |               |       |                                                                                                                                                                                                                                                |      |              |              |       |
| No qualifications                           | 349                                                                                                                                                                                                         | 56.7 | 25.123 (4)    | <.001 | 410                                                                                                                                                                                                                                            | ref  |              |              | <.001 |
| Degree or equivalent and above              | 1305                                                                                                                                                                                                        | 63.0 |               |       | 2454                                                                                                                                                                                                                                           | 1.34 | 1.07         | 1.67         | .012  |
| A levels / Vocational level 3 or equivalent | 680                                                                                                                                                                                                         | 60.1 |               |       | 990                                                                                                                                                                                                                                            | 1.20 | 0.94         | 1.53         | .146  |
| Other qual'ns below A level / Voc level 3   | 485                                                                                                                                                                                                         | 57.9 |               |       | 784                                                                                                                                                                                                                                            | 1.02 | 0.79         | 1.31         | .890  |
| Other qualification                         | 151                                                                                                                                                                                                         | 49.8 |               |       | 255                                                                                                                                                                                                                                            | 0.82 | 0.59         | 1.13         | .216  |
| <b>Financial Status</b>                     |                                                                                                                                                                                                             |      |               |       |                                                                                                                                                                                                                                                |      |              |              |       |
| Living comfortably                          | 883                                                                                                                                                                                                         | 68.7 | 78.993 (4)    | <.001 | 1533                                                                                                                                                                                                                                           | ref  |              |              | <.001 |
| Doing alright                               | 1220                                                                                                                                                                                                        | 60.0 |               |       | 1997                                                                                                                                                                                                                                           | 0.77 | 0.66         | 0.89         | <.001 |
| Just about getting by                       | 607                                                                                                                                                                                                         | 53.6 |               |       | 960                                                                                                                                                                                                                                            | 0.63 | 0.53         | 0.75         | <.001 |
| Finding it quite difficult                  | 178                                                                                                                                                                                                         | 52.8 |               |       | 266                                                                                                                                                                                                                                            | 0.62 | 0.47         | 0.82         | .001  |
| Finding it very difficult                   | 81                                                                                                                                                                                                          | 46.8 |               |       | 137                                                                                                                                                                                                                                            | 0.51 | 0.35         | 0.73         | <.001 |
| <b>Country</b>                              |                                                                                                                                                                                                             |      |               |       |                                                                                                                                                                                                                                                |      |              |              |       |
| England                                     | 2589                                                                                                                                                                                                        | 60.4 | 7.095 (2)     | .029  | 4301                                                                                                                                                                                                                                           | ref  |              |              | .673  |
| Scotland                                    | 239                                                                                                                                                                                                         | 54.1 |               |       | 384                                                                                                                                                                                                                                            | 0.91 | 0.73         | 1.13         | .403  |
| Wales                                       | 137                                                                                                                                                                                                         | 57.8 |               |       | 208                                                                                                                                                                                                                                            | 0.95 | 0.71         | 1.27         | .721  |
| <b>Urban/rural</b>                          |                                                                                                                                                                                                             |      |               |       |                                                                                                                                                                                                                                                |      |              |              |       |
| Urban                                       | 2349                                                                                                                                                                                                        | 58.7 | 8.096 (1)     | .004  | 3728                                                                                                                                                                                                                                           |      |              |              |       |
| Rural                                       | 615                                                                                                                                                                                                         | 63.7 |               |       | 1165                                                                                                                                                                                                                                           | 1.04 | 0.90         | 1.20         | .599  |
| <b>Ethnicity</b>                            |                                                                                                                                                                                                             |      |               |       |                                                                                                                                                                                                                                                |      |              |              |       |
| White British                               | 2516                                                                                                                                                                                                        | 62.9 | 91.005 (5)    | <.001 | 4226                                                                                                                                                                                                                                           | ref  |              |              | <.001 |
| Any other white background                  | 157                                                                                                                                                                                                         | 46.7 |               |       | 318                                                                                                                                                                                                                                            | 0.57 | 0.45         | 0.72         | <.001 |
| Mixed or multiple ethnic groups             | 39                                                                                                                                                                                                          | 40.2 |               |       | 62                                                                                                                                                                                                                                             | 0.42 | 0.25         | 0.70         | <.001 |
| Asian or Asian British                      | 142                                                                                                                                                                                                         | 46.6 |               |       | 160                                                                                                                                                                                                                                            | 0.47 | 0.34         | 0.65         | <.001 |
| Black or Black British                      | 51                                                                                                                                                                                                          | 50.5 |               |       | 67                                                                                                                                                                                                                                             | 0.63 | 0.39         | 1.03         | .067  |
| Other                                       | 35                                                                                                                                                                                                          | 43.2 |               |       | 60                                                                                                                                                                                                                                             | 0.48 | 0.29         | 0.81         | .006  |
|                                             |                                                                                                                                                                                                             |      |               |       | Hosmer & Lemeshow $\chi^2$ = 11.453, df=8, p=0.177.<br>Final model $\chi^2$ =157.815, df=24, p<0.001<br>Nagelkerke = .043<br>Cases correctly classified: 64.5%.<br>85 cases excluded due to missing data on one or more independent variables. |      |              |              |       |

\* adjusted for all other variables in the model, AOR, adjusted odds ratio; ref, reference category; 95% CI, 95% confidence interval. # Fisher-Freeman-Halton Exact Test.

**Table S4 The NHS – Association between trust in sources of information about COVID-19 vaccine and socio-demographic variables – (a) bivariate results and (b) multivariate logistic regression.**

|                                             | (a) Bivariate associations between socio-demographics and trusting COVID-19 vaccine info from the NHS<br>% Trust completely or a great deal (weighted)<br>$\chi^2$ test for differences by demographics |      |               |       | (b) Logistic regression of trust in COVID-19 vaccine info from the NHS<br>1 = Trust completely or a great deal (4115), 0 = Trust somewhat, very little or not at all (775)                                                                    |      |              |              |       |
|---------------------------------------------|---------------------------------------------------------------------------------------------------------------------------------------------------------------------------------------------------------|------|---------------|-------|-----------------------------------------------------------------------------------------------------------------------------------------------------------------------------------------------------------------------------------------------|------|--------------|--------------|-------|
|                                             | n                                                                                                                                                                                                       | %    | $\chi^2$ (df) | P     | N                                                                                                                                                                                                                                             | AOR* | 95% CI Lower | 95% CI Upper | P     |
| <b>Gender</b>                               |                                                                                                                                                                                                         |      |               |       |                                                                                                                                                                                                                                               |      |              |              |       |
| Male                                        | 1926                                                                                                                                                                                                    | 80.3 | 1.598 (2)     | .450  | 2097                                                                                                                                                                                                                                          | ref  |              |              | .461  |
| Female                                      | 2055                                                                                                                                                                                                    | 80.2 |               |       | 2784                                                                                                                                                                                                                                          | 0.97 | 0.82         | 1.14         | .718  |
| Other                                       | 5                                                                                                                                                                                                       | 62.5 |               |       | 9                                                                                                                                                                                                                                             | 0.41 | 0.10         | 1.74         | .225  |
| <b>Age</b>                                  |                                                                                                                                                                                                         |      |               |       |                                                                                                                                                                                                                                               |      |              |              |       |
| 18-29                                       | 609                                                                                                                                                                                                     | 73.9 | 106.785 (6)   | <.001 | 459                                                                                                                                                                                                                                           | ref  |              |              | <.001 |
| 30-39 v 18-29                               | 632                                                                                                                                                                                                     | 74.4 |               |       | 759                                                                                                                                                                                                                                           | 0.94 | 0.70         | 1.26         | .672  |
| 40-49 v 18-39                               | 618                                                                                                                                                                                                     | 77.1 |               |       | 834                                                                                                                                                                                                                                           | 1.05 | 0.84         | 1.32         | .672  |
| 50-59 v 18-49                               | 710                                                                                                                                                                                                     | 81.9 |               |       | 895                                                                                                                                                                                                                                           | 1.45 | 1.16         | 1.81         | .001  |
| 60-69 v 18-59                               | 609                                                                                                                                                                                                     | 85.7 |               |       | 1004                                                                                                                                                                                                                                          | 1.62 | 1.29         | 2.03         | <.001 |
| 70-79 v 18-69                               | 593                                                                                                                                                                                                     | 90.5 |               |       | 762                                                                                                                                                                                                                                           | 1.99 | 1.50         | 2.63         | <.001 |
| 80+ v 18-79                                 | 186                                                                                                                                                                                                     | 85.3 |               |       | 177                                                                                                                                                                                                                                           | 1.66 | 0.99         | 2.79         | .056  |
| <b>Education/Highest qualification</b>      |                                                                                                                                                                                                         |      |               |       |                                                                                                                                                                                                                                               |      |              |              |       |
| No qualifications                           | 447                                                                                                                                                                                                     | 72.6 | 60.407 (4)    | <.001 | 410                                                                                                                                                                                                                                           | ref  |              |              | <.001 |
| Degree or equivalent and above              | 1733                                                                                                                                                                                                    | 83.7 |               |       | 2452                                                                                                                                                                                                                                          | 2.39 | 1.80         | 3.16         | <.001 |
| A levels / Vocational level 3 or equivalent | 909                                                                                                                                                                                                     | 80.4 |               |       | 990                                                                                                                                                                                                                                           | 1.95 | 1.44         | 2.64         | <.001 |
| Other qual'ns below A level / Voc level 3   | 679                                                                                                                                                                                                     | 81.2 |               |       | 783                                                                                                                                                                                                                                           | 1.78 | 1.30         | 2.43         | <.001 |
| Other qualification                         | 211                                                                                                                                                                                                     | 69.6 |               |       | 255                                                                                                                                                                                                                                           | 0.95 | 0.65         | 1.39         | .805  |
| <b>Financial Status</b>                     |                                                                                                                                                                                                         |      |               |       |                                                                                                                                                                                                                                               |      |              |              |       |
| Living comfortably                          | 1136                                                                                                                                                                                                    | 88.3 | 167.221 (4)   | <.001 | 1533                                                                                                                                                                                                                                          | ref  |              |              | <.001 |
| Doing alright                               | 1675                                                                                                                                                                                                    | 82.4 |               |       | 1996                                                                                                                                                                                                                                          | 0.74 | 0.59         | 0.92         | .006  |
| Just about getting by                       | 823                                                                                                                                                                                                     | 72.8 |               |       | 958                                                                                                                                                                                                                                           | 0.47 | 0.37         | 0.60         | <.001 |
| Finding it quite difficult                  | 248                                                                                                                                                                                                     | 73.6 |               |       | 266                                                                                                                                                                                                                                           | 0.51 | 0.36         | 0.72         | <.001 |
| Finding it very difficult                   | 99                                                                                                                                                                                                      | 56.9 |               |       | 137                                                                                                                                                                                                                                           | 0.31 | 0.21         | 0.47         | <.001 |
| <b>Country</b>                              |                                                                                                                                                                                                         |      |               |       |                                                                                                                                                                                                                                               |      |              |              |       |
| England                                     | 3459                                                                                                                                                                                                    | 80.8 | 6.736 (2)     | .034  | 4298                                                                                                                                                                                                                                          | ref  |              |              | .505  |
| Scotland                                    | 345                                                                                                                                                                                                     | 78.1 |               |       | 384                                                                                                                                                                                                                                           | 0.98 | 0.73         | 1.32         | .900  |
| Wales                                       | 177                                                                                                                                                                                                     | 74.7 |               |       | 208                                                                                                                                                                                                                                           | 0.80 | 0.54         | 1.17         | .243  |
| <b>Urban/rural</b>                          |                                                                                                                                                                                                         |      |               |       |                                                                                                                                                                                                                                               |      |              |              |       |
| Urban                                       | 3165                                                                                                                                                                                                    | 79.2 | 14.722 (1)    | <.001 | 3725                                                                                                                                                                                                                                          |      |              |              |       |
| Rural                                       | 817                                                                                                                                                                                                     | 84.7 |               |       | 1165                                                                                                                                                                                                                                          | 1.03 | 0.84         | 1.26         | .791  |
| <b>Ethnicity</b>                            |                                                                                                                                                                                                         |      |               |       |                                                                                                                                                                                                                                               |      |              |              |       |
| White British                               | 3331                                                                                                                                                                                                    | 83.3 | 126.307 (5)   | <.001 | 4225                                                                                                                                                                                                                                          | ref  |              |              | <.001 |
| Any other white background                  | 224                                                                                                                                                                                                     | 67.3 |               |       | 317                                                                                                                                                                                                                                           | 0.47 | 0.36         | 0.63         | <.001 |
| Mixed or multiple ethnic groups             | 67                                                                                                                                                                                                      | 69.1 |               |       | 62                                                                                                                                                                                                                                            | 0.48 | 0.27         | 0.86         | .014  |
| Asian or Asian British                      | 207                                                                                                                                                                                                     | 68.1 |               |       | 160                                                                                                                                                                                                                                           | 0.57 | 0.39         | 0.84         | .004  |
| Black or Black British                      | 60                                                                                                                                                                                                      | 60.0 |               |       | 66                                                                                                                                                                                                                                            | 0.38 | 0.22         | 0.65         | <.001 |
| Other                                       | 57                                                                                                                                                                                                      | 70.4 |               |       | 60                                                                                                                                                                                                                                            | 0.45 | 0.25         | 0.81         | .008  |
|                                             |                                                                                                                                                                                                         |      |               |       | Hosmer & Lemeshow $\chi^2= 8.677$ , df=8, p=0.370.<br>Final model $\chi^2=291.002$ , df=24, p<0.001<br>Nagelkerke = .099<br>Cases correctly classified: 84.3%.<br>88 cases excluded due to missing data on one or more independent variables. |      |              |              |       |

\* adjusted for all other variables in the model, AOR, adjusted odds ratio; ref, reference category; 95% CI, 95% confidence interval.

**Table S5 Drug companies who manufacture vaccines – Association between trust in sources of information about COVID-19 vaccine and socio-demographic variables – (a) bivariate results and (b) multivariate logistic regression.**

|                                             | (a) Bivariate associations between socio-demographics and trusting COVID-19 vaccine info from drug companies who manufacture vaccines |      |               |       | (b) Logistic regression of trust in COVID-19 vaccine info from drug companies who manufacture vaccines                                                                                                                                      |      |              |              |       |
|---------------------------------------------|---------------------------------------------------------------------------------------------------------------------------------------|------|---------------|-------|---------------------------------------------------------------------------------------------------------------------------------------------------------------------------------------------------------------------------------------------|------|--------------|--------------|-------|
|                                             | % Trust completely or a great deal (weighted)<br>$\chi^2$ test for differences by demographics                                        |      |               |       | 1 = Trust completely or a great deal (1416), 0 = Trust somewhat, very little or not at all (3473)                                                                                                                                           |      |              |              |       |
|                                             | n                                                                                                                                     | %    | $\chi^2$ (df) | P     | N                                                                                                                                                                                                                                           | AOR* | 95% CI Lower | 95% CI Upper | P     |
| <b>Gender</b>                               |                                                                                                                                       |      |               |       |                                                                                                                                                                                                                                             |      |              |              |       |
| Male                                        | 652                                                                                                                                   | 27.2 | 16.276#       | <.001 | 2096                                                                                                                                                                                                                                        | ref  |              |              | <.001 |
| Female                                      | 819                                                                                                                                   | 32.0 |               |       | 2784                                                                                                                                                                                                                                        | 1.28 | 1.12         | 1.45         | <.001 |
| Other                                       | 0                                                                                                                                     | 0.0  |               |       | 9                                                                                                                                                                                                                                           | 0.00 | 0.00         | .            | .999  |
| <b>Age</b>                                  |                                                                                                                                       |      |               |       |                                                                                                                                                                                                                                             |      |              |              |       |
| 18-29                                       | 264                                                                                                                                   | 32.0 | 32.180 (6)    | <.001 | 459                                                                                                                                                                                                                                         | ref  |              |              | .030  |
| 30-39 v 18-29                               | 249                                                                                                                                   | 29.3 |               |       | 759                                                                                                                                                                                                                                         | 0.91 | 0.71         | 1.18         | .480  |
| 40-49 v 18-39                               | 196                                                                                                                                   | 24.5 |               |       | 834                                                                                                                                                                                                                                         | 0.72 | 0.59         | 0.89         | .002  |
| 50-59 v 18-49                               | 226                                                                                                                                   | 26.1 |               |       | 896                                                                                                                                                                                                                                         | 0.87 | 0.72         | 1.04         | .120  |
| 60-69 v 18-59                               | 219                                                                                                                                   | 30.8 |               |       | 1004                                                                                                                                                                                                                                        | 0.96 | 0.81         | 1.13         | .613  |
| 70-79 v 18-69                               | 233                                                                                                                                   | 35.6 |               |       | 760                                                                                                                                                                                                                                         | 1.12 | 0.94         | 1.34         | .204  |
| 80+ v 18-79                                 | 76                                                                                                                                    | 34.7 |               |       | 177                                                                                                                                                                                                                                         | 1.02 | 0.73         | 1.42         | .905  |
| <b>Education/Highest qualification</b>      |                                                                                                                                       |      |               |       |                                                                                                                                                                                                                                             |      |              |              |       |
| No qualifications                           | 217                                                                                                                                   | 35.3 | 17.807 (4)    | .001  | 408                                                                                                                                                                                                                                         | ref  |              |              | .004  |
| Degree or equivalent and above              | 569                                                                                                                                   | 27.5 |               |       | 2454                                                                                                                                                                                                                                        | 0.72 | 0.57         | 0.92         | .007  |
| A levels / Vocational level 3 or equivalent | 321                                                                                                                                   | 28.4 |               |       | 990                                                                                                                                                                                                                                         | 0.78 | 0.60         | 1.01         | .057  |
| Other qual'ns below A level / Voc level 3   | 267                                                                                                                                   | 31.9 |               |       | 783                                                                                                                                                                                                                                         | 0.97 | 0.75         | 1.26         | .844  |
| Other qualification                         | 97                                                                                                                                    | 32.1 |               |       | 254                                                                                                                                                                                                                                         | 0.94 | 0.67         | 1.32         | .732  |
| <b>Financial Status</b>                     |                                                                                                                                       |      |               |       |                                                                                                                                                                                                                                             |      |              |              |       |
| Living comfortably                          | 444                                                                                                                                   | 34.5 | 20.183 (4)    | <.001 | 1533                                                                                                                                                                                                                                        | ref  |              |              | <.001 |
| Doing alright                               | 565                                                                                                                                   | 27.8 |               |       | 1995                                                                                                                                                                                                                                        | 0.72 | 0.62         | 0.83         | <.001 |
| Just about getting by                       | 313                                                                                                                                   | 27.7 |               |       | 958                                                                                                                                                                                                                                         | 0.66 | 0.55         | 0.80         | <.001 |
| Finding it quite difficult                  | 98                                                                                                                                    | 29.0 |               |       | 266                                                                                                                                                                                                                                         | 0.74 | 0.55         | 1.00         | .054  |
| Finding it very difficult                   | 50                                                                                                                                    | 29.1 |               |       | 137                                                                                                                                                                                                                                         | 0.55 | 0.36         | 0.85         | .007  |
| <b>Country</b>                              |                                                                                                                                       |      |               |       |                                                                                                                                                                                                                                             |      |              |              |       |
| England                                     | 1259                                                                                                                                  | 29.4 | 2.325 (2)     | .313  | 4297                                                                                                                                                                                                                                        | ref  |              |              | .842  |
| Scotland                                    | 130                                                                                                                                   | 29.3 |               |       | 384                                                                                                                                                                                                                                         | 1.00 | 0.79         | 1.26         | .996  |
| Wales                                       | 81                                                                                                                                    | 34.0 |               |       | 208                                                                                                                                                                                                                                         | 1.10 | 0.81         | 1.49         | .559  |
| <b>Urban/rural</b>                          |                                                                                                                                       |      |               |       |                                                                                                                                                                                                                                             |      |              |              |       |
| Urban                                       | 1187                                                                                                                                  | 29.7 | .092 (1)      | .762  | 3724                                                                                                                                                                                                                                        |      |              |              |       |
| Rural                                       | 282                                                                                                                                   | 29.2 |               |       | 1165                                                                                                                                                                                                                                        | 0.99 | 0.85         | 1.15         | .868  |
| <b>Ethnicity</b>                            |                                                                                                                                       |      |               |       |                                                                                                                                                                                                                                             |      |              |              |       |
| White British                               | 1234                                                                                                                                  | 30.9 | 29.028 (5)    | <.001 | 4223                                                                                                                                                                                                                                        | ref  |              |              | .012  |
| Any other white background                  | 70                                                                                                                                    | 20.9 |               |       | 318                                                                                                                                                                                                                                         | 0.63 | 0.48         | 0.84         | .002  |
| Mixed or multiple ethnic groups             | 20                                                                                                                                    | 20.6 |               |       | 62                                                                                                                                                                                                                                          | 0.92 | 0.52         | 1.62         | .769  |
| Asian or Asian British                      | 83                                                                                                                                    | 27.2 |               |       | 160                                                                                                                                                                                                                                         | 0.74 | 0.50         | 1.08         | .119  |
| Black or Black British                      | 35                                                                                                                                    | 34.7 |               |       | 67                                                                                                                                                                                                                                          | 1.11 | 0.64         | 1.91         | .714  |
| Other                                       | 12                                                                                                                                    | 15.2 |               |       | 59                                                                                                                                                                                                                                          | 0.55 | 0.28         | 1.07         | .078  |
|                                             |                                                                                                                                       |      |               |       | Hosmer & Lemeshow $\chi^2=9.180$ , df=8, p=0.327.<br>Final model $\chi^2=96.401$ , df=24, p<0.001<br>Nagelkerke = .028<br>Cases correctly classified: 71.0%.<br>89 cases excluded due to missing data on one or more independent variables. |      |              |              |       |

\* adjusted for all other variables in the model, AOR, adjusted odds ratio; ref, reference category; 95% CI, 95% confidence interval. # Fisher-Freeman-Halton Exact Test.

**Table S6 The UK Government – Association between trust in sources of information about COVID-19 vaccine and socio-demographic variables – (a) bivariate results and (b) multivariate logistic regression.**

|                                             | (a) Bivariate associations between socio-demographics and trusting COVID-19 vaccine info from the UK Government<br>% Trust completely or a great deal (weighted)<br>$\chi^2$ test for differences by demographics |      |               |       | (b) Logistic regression of trust in COVID-19 vaccine info from the UK Government<br>1 = Trust completely or a great deal (2279), 0 = Trust somewhat, very little or not at all (2607)                                                        |      |              |              |       |
|---------------------------------------------|-------------------------------------------------------------------------------------------------------------------------------------------------------------------------------------------------------------------|------|---------------|-------|----------------------------------------------------------------------------------------------------------------------------------------------------------------------------------------------------------------------------------------------|------|--------------|--------------|-------|
|                                             | n                                                                                                                                                                                                                 | %    | $\chi^2$ (df) | P     | N                                                                                                                                                                                                                                            | AOR* | 95% CI Lower | 95% CI Upper | P     |
| <b>Gender</b>                               |                                                                                                                                                                                                                   |      |               |       |                                                                                                                                                                                                                                              |      |              |              |       |
| Male                                        | 1114                                                                                                                                                                                                              | 46.6 | 10.393#       | .005  | 2096                                                                                                                                                                                                                                         | ref  |              |              | .012  |
| Female                                      | 1080                                                                                                                                                                                                              | 42.3 |               |       | 2781                                                                                                                                                                                                                                         | 0.84 | 0.75         | 0.95         | .004  |
| Other                                       | 2                                                                                                                                                                                                                 | 25.0 |               |       | 9                                                                                                                                                                                                                                            | 0.47 | 0.09         | 2.37         | .363  |
| <b>Age</b>                                  |                                                                                                                                                                                                                   |      |               |       |                                                                                                                                                                                                                                              |      |              |              |       |
| 18-29                                       | 261                                                                                                                                                                                                               | 31.9 | 182.080 (6)   | <.001 | 458                                                                                                                                                                                                                                          | ref  |              |              | <.001 |
| 30-39 v 18-29                               | 290                                                                                                                                                                                                               | 34.2 |               |       | 758                                                                                                                                                                                                                                          | 1.14 | 0.89         | 1.47         | .289  |
| 40-49 v 18-39                               | 332                                                                                                                                                                                                               | 41.5 |               |       | 834                                                                                                                                                                                                                                          | 1.37 | 1.14         | 1.65         | <.001 |
| 50-59 v 18-49                               | 416                                                                                                                                                                                                               | 48.0 |               |       | 895                                                                                                                                                                                                                                          | 1.67 | 1.41         | 1.97         | <.001 |
| 60-69 v 18-59                               | 373                                                                                                                                                                                                               | 52.8 |               |       | 1003                                                                                                                                                                                                                                         | 1.46 | 1.25         | 1.70         | <.001 |
| 70-79 v 18-69                               | 383                                                                                                                                                                                                               | 58.6 |               |       | 762                                                                                                                                                                                                                                          | 1.65 | 1.40         | 1.96         | <.001 |
| 80+ v 18-79                                 | 124                                                                                                                                                                                                               | 57.1 |               |       | 176                                                                                                                                                                                                                                          | 1.54 | 1.13         | 2.11         | .007  |
| <b>Education/Highest qualification</b>      |                                                                                                                                                                                                                   |      |               |       |                                                                                                                                                                                                                                              |      |              |              |       |
| No qualifications                           | 269                                                                                                                                                                                                               | 43.7 | 2.856 (4)     | .582  | 410                                                                                                                                                                                                                                          | ref  |              |              | .439  |
| Degree or equivalent and above              | 924                                                                                                                                                                                                               | 44.8 |               |       | 2450                                                                                                                                                                                                                                         | 0.95 | 0.76         | 1.18         | .622  |
| A levels / Vocational level 3 or equivalent | 482                                                                                                                                                                                                               | 42.6 |               |       | 990                                                                                                                                                                                                                                          | 1.04 | 0.82         | 1.33         | .733  |
| Other qual'ns below A level / Voc level 3   | 386                                                                                                                                                                                                               | 46.2 |               |       | 783                                                                                                                                                                                                                                          | 1.07 | 0.83         | 1.37         | .601  |
| Other qualification                         | 134                                                                                                                                                                                                               | 45.1 |               |       | 253                                                                                                                                                                                                                                          | 1.14 | 0.83         | 1.58         | .422  |
| <b>Financial Status</b>                     |                                                                                                                                                                                                                   |      |               |       |                                                                                                                                                                                                                                              |      |              |              |       |
| Living comfortably                          | 704                                                                                                                                                                                                               | 54.8 | 94.512 (4)    | <.001 | 1533                                                                                                                                                                                                                                         | ref  |              |              | <.001 |
| Doing alright                               | 891                                                                                                                                                                                                               | 43.9 |               |       | 1994                                                                                                                                                                                                                                         | 0.76 | 0.66         | 0.87         | <.001 |
| Just about getting by                       | 415                                                                                                                                                                                                               | 36.9 |               |       | 957                                                                                                                                                                                                                                          | 0.54 | 0.45         | 0.64         | <.001 |
| Finding it quite difficult                  | 124                                                                                                                                                                                                               | 36.9 |               |       | 266                                                                                                                                                                                                                                          | 0.55 | 0.42         | 0.73         | <.001 |
| Finding it very difficult                   | 60                                                                                                                                                                                                                | 36.1 |               |       | 136                                                                                                                                                                                                                                          | 0.40 | 0.27         | 0.59         | <.001 |
| <b>Country</b>                              |                                                                                                                                                                                                                   |      |               |       |                                                                                                                                                                                                                                              |      |              |              |       |
| England                                     | 1928                                                                                                                                                                                                              | 45.1 | 19.887 (2)    | <.001 | 4295                                                                                                                                                                                                                                         | ref  |              |              | .003  |
| Scotland                                    | 151                                                                                                                                                                                                               | 34.5 |               |       | 383                                                                                                                                                                                                                                          | 0.70 | 0.56         | 0.88         | .002  |
| Wales                                       | 114                                                                                                                                                                                                               | 48.3 |               |       | 208                                                                                                                                                                                                                                          | 1.18 | 0.89         | 1.58         | .253  |
| <b>Urban/rural</b>                          |                                                                                                                                                                                                                   |      |               |       |                                                                                                                                                                                                                                              |      |              |              |       |
| Urban                                       | 1741                                                                                                                                                                                                              | 43.8 | 2.886 (1)     | .089  | 3721                                                                                                                                                                                                                                         |      |              |              |       |
| Rural                                       | 451                                                                                                                                                                                                               | 46.8 |               |       | 1165                                                                                                                                                                                                                                         | 1.00 | 0.87         | 1.15         | .969  |
| <b>Ethnicity</b>                            |                                                                                                                                                                                                                   |      |               |       |                                                                                                                                                                                                                                              |      |              |              |       |
| White British                               | 1832                                                                                                                                                                                                              | 45.9 | 35.180 (5)    | <.001 | 4224                                                                                                                                                                                                                                         | ref  |              |              | .074  |
| Any other white background                  | 104                                                                                                                                                                                                               | 31.2 |               |       | 317                                                                                                                                                                                                                                          | 0.70 | 0.55         | 0.90         | .005  |
| Mixed or multiple ethnic groups             | 31                                                                                                                                                                                                                | 32.0 |               |       | 62                                                                                                                                                                                                                                           | 0.73 | 0.43         | 1.26         | .258  |
| Asian or Asian British                      | 126                                                                                                                                                                                                               | 42.6 |               |       | 158                                                                                                                                                                                                                                          | 1.14 | 0.82         | 1.59         | .430  |
| Black or Black British                      | 40                                                                                                                                                                                                                | 40.0 |               |       | 66                                                                                                                                                                                                                                           | 1.07 | 0.64         | 1.77         | .803  |
| Other                                       | 31                                                                                                                                                                                                                | 39.2 |               |       | 59                                                                                                                                                                                                                                           | 1.03 | 0.60         | 1.76         | .910  |
|                                             |                                                                                                                                                                                                                   |      |               |       | Hosmer & Lemeshow $\chi^2=9.412$ , df=8, p=0.309.<br>Final model $\chi^2=258.301$ , df=24, p<0.001<br>Nagelkerke = .069<br>Cases correctly classified: 60.3%.<br>92 cases excluded due to missing data on one or more independent variables. |      |              |              |       |

\* adjusted for all other variables in the model, AOR, adjusted odds ratio; ref, reference category; 95% CI, 95% confidence interval. # Fisher-Freeman-Halton Exact Test.

**Table S7 The Scottish/Welsh Government – Association between trust in sources of information about COVID-19 vaccine and socio-demographic variables – (a) bivariate results and (b) multivariate logistic regression.**

|                                             | (a) Bivariate associations between socio-demographics and trusting COVID-19 vaccine info from the Scottish/Welsh Government<br>% Trust completely or a great deal (weighted)<br>$\chi^2$ test for differences by demographics |      |               |       | (b) Logistic regression of trust in COVID-19 vaccine info from the Scottish/Welsh Government<br>1 = Trust completely or a great deal (289), 0 = Trust somewhat, very little or not at all (297)                                              |      |              |              |      |
|---------------------------------------------|-------------------------------------------------------------------------------------------------------------------------------------------------------------------------------------------------------------------------------|------|---------------|-------|----------------------------------------------------------------------------------------------------------------------------------------------------------------------------------------------------------------------------------------------|------|--------------|--------------|------|
|                                             | n                                                                                                                                                                                                                             | %    | $\chi^2$ (df) | P     | N                                                                                                                                                                                                                                            | AOR* | 95% CI Lower | 95% CI Upper | P    |
| <b>Gender</b>                               |                                                                                                                                                                                                                               |      |               |       |                                                                                                                                                                                                                                              |      |              |              |      |
| Male                                        | 173                                                                                                                                                                                                                           | 49.0 | 3.935 (1)     | .047  | 274                                                                                                                                                                                                                                          | ref  |              |              |      |
| Female                                      | 132                                                                                                                                                                                                                           | 41.4 |               |       | 312                                                                                                                                                                                                                                          | 0.89 | 0.63         | 1.25         | .491 |
| <b>Age</b>                                  |                                                                                                                                                                                                                               |      |               |       |                                                                                                                                                                                                                                              |      |              |              |      |
| 18-29                                       | 61                                                                                                                                                                                                                            | 50.8 | 8.885 (6)     | .180  | 63                                                                                                                                                                                                                                           | ref  |              |              | .249 |
| 30-39 v 18-29                               | 45                                                                                                                                                                                                                            | 44.1 |               |       | 93                                                                                                                                                                                                                                           | 1.27 | 0.65         | 2.48         | .485 |
| 40-49 v 18-39                               | 36                                                                                                                                                                                                                            | 36.7 |               |       | 95                                                                                                                                                                                                                                           | 0.87 | 0.51         | 1.49         | .617 |
| 50-59 v 18-49                               | 75                                                                                                                                                                                                                            | 52.1 |               |       | 117                                                                                                                                                                                                                                          | 1.66 | 1.03         | 2.67         | .037 |
| 60-69 v 18-59                               | 46                                                                                                                                                                                                                            | 46.5 |               |       | 113                                                                                                                                                                                                                                          | 1.06 | 0.67         | 1.68         | .790 |
| 70-79 v 18-69                               | 32                                                                                                                                                                                                                            | 43.8 |               |       | 81                                                                                                                                                                                                                                           | 0.78 | 0.46         | 1.32         | .353 |
| 80+ v 18-79                                 | 10                                                                                                                                                                                                                            | 33.3 |               |       | 24                                                                                                                                                                                                                                           | 0.63 | 0.26         | 1.50         | .297 |
| <b>Education/Highest qualification</b>      |                                                                                                                                                                                                                               |      |               |       |                                                                                                                                                                                                                                              |      |              |              |      |
| No qualifications                           | 29                                                                                                                                                                                                                            | 27.9 | 31.212 (4)    | <.001 | 52                                                                                                                                                                                                                                           | ref  |              |              | .042 |
| Degree or equivalent and above              | 144                                                                                                                                                                                                                           | 56.7 |               |       | 280                                                                                                                                                                                                                                          | 2.18 | 1.12         | 4.23         | .021 |
| A levels / Vocational level 3 or equivalent | 79                                                                                                                                                                                                                            | 47.3 |               |       | 135                                                                                                                                                                                                                                          | 1.95 | 0.97         | 3.95         | .062 |
| Other qual'ns below A level / Voc level 3   | 34                                                                                                                                                                                                                            | 36.6 |               |       | 81                                                                                                                                                                                                                                           | 1.27 | 0.60         | 2.69         | .538 |
| Other qualification                         | 18                                                                                                                                                                                                                            | 35.3 |               |       | 38                                                                                                                                                                                                                                           | 1.03 | 0.42         | 2.53         | .941 |
| <b>Financial Status</b>                     |                                                                                                                                                                                                                               |      |               |       |                                                                                                                                                                                                                                              |      |              |              |      |
| Living comfortably                          | 84                                                                                                                                                                                                                            | 56.0 | 8.356 (4)     | .079  | 167                                                                                                                                                                                                                                          | ref  |              |              | .153 |
| Doing alright                               | 118                                                                                                                                                                                                                           | 42.4 |               |       | 256                                                                                                                                                                                                                                          | 0.69 | 0.46         | 1.05         | .081 |
| Just about getting by                       | 71                                                                                                                                                                                                                            | 43.3 |               |       | 114                                                                                                                                                                                                                                          | 0.62 | 0.37         | 1.05         | .074 |
| Finding it quite difficult                  | 22                                                                                                                                                                                                                            | 41.5 |               |       | 34                                                                                                                                                                                                                                           | 0.49 | 0.22         | 1.09         | .078 |
| Finding it very difficult                   | 11                                                                                                                                                                                                                            | 45.8 |               |       | 15                                                                                                                                                                                                                                           | 0.34 | 0.10         | 1.16         | .083 |
| <b>Country</b>                              |                                                                                                                                                                                                                               |      |               |       |                                                                                                                                                                                                                                              |      |              |              |      |
| Scotland                                    | 206                                                                                                                                                                                                                           | 46.9 | 1.208 (1)     | .272  | 381                                                                                                                                                                                                                                          | ref  |              |              |      |
| Wales                                       | 99                                                                                                                                                                                                                            | 42.5 |               |       | 205                                                                                                                                                                                                                                          | 1.09 | 0.76         | 1.57         | .642 |
| <b>Urban/rural</b>                          |                                                                                                                                                                                                                               |      |               |       |                                                                                                                                                                                                                                              |      |              |              |      |
| Urban                                       | 233                                                                                                                                                                                                                           | 46.9 | 1.719 (1)     | .190  | 409                                                                                                                                                                                                                                          |      |              |              |      |
| Rural                                       | 72                                                                                                                                                                                                                            | 41.1 |               |       | 177                                                                                                                                                                                                                                          | 0.62 | 0.42         | 0.91         | .015 |
| <b>Ethnicity</b>                            |                                                                                                                                                                                                                               |      |               |       |                                                                                                                                                                                                                                              |      |              |              |      |
| White British                               | 270                                                                                                                                                                                                                           | 45.3 | .147 (1)      | .702  | 535                                                                                                                                                                                                                                          | ref  |              |              |      |
| Other than white British                    | 32                                                                                                                                                                                                                            | 47.8 |               |       | 51                                                                                                                                                                                                                                           | 1.03 | 0.55         | 1.92         | .932 |
|                                             |                                                                                                                                                                                                                               |      |               |       | Hosmer & Lemeshow $\chi^2=12.017$ , df=8, p=0.150.<br>Final model $\chi^2=35.151$ , df=18, p=0.009<br>Nagelkerke = .078<br>Cases correctly classified: 61.4%.<br>16 cases excluded due to missing data on one or more independent variables. |      |              |              |      |

\* adjusted for all other variables in the model, AOR, adjusted odds ratio; ref, reference category; 95% CI, 95% confidence interval. # Fisher-Freeman-Halton Exact Test.



**Table S8 Scientific and medical advisers – Association between trust in sources of information about COVID-19 vaccine and socio-demographic variables – (a) bivariate results and (b) multivariate logistic regression.**

|                                             | (a) Bivariate associations between socio-demographics and trusting COVID-19 vaccine info from scientific and medical advisers<br>% Trust completely or a great deal (weighted)<br>$\chi^2$ test for differences by demographics |      |               |       | (b) Logistic regression of trust in COVID-19 vaccine info from scientific and medical advisers<br>1 = Trust completely or a great deal (4008), 0 = Trust somewhat, very little or not at all (884)                                            |      |              |              |       |
|---------------------------------------------|---------------------------------------------------------------------------------------------------------------------------------------------------------------------------------------------------------------------------------|------|---------------|-------|-----------------------------------------------------------------------------------------------------------------------------------------------------------------------------------------------------------------------------------------------|------|--------------|--------------|-------|
|                                             | n                                                                                                                                                                                                                               | %    | $\chi^2$ (df) | P     | N                                                                                                                                                                                                                                             | AOR* | 95% CI Lower | 95% CI Upper | P     |
| <b>Gender</b>                               |                                                                                                                                                                                                                                 |      |               |       |                                                                                                                                                                                                                                               |      |              |              |       |
| Male                                        | 1885                                                                                                                                                                                                                            | 78.6 | 0.302 (2)     | .860  | 2097                                                                                                                                                                                                                                          | ref  |              |              | .544  |
| Female                                      | 2006                                                                                                                                                                                                                            | 78.2 |               |       | 2786                                                                                                                                                                                                                                          | 1.08 | 0.93         | 1.26         | .320  |
| Other                                       | 5                                                                                                                                                                                                                               | 71.4 |               |       | 9                                                                                                                                                                                                                                             | 0.71 | 0.14         | 3.51         | .674  |
| <b>Age</b>                                  |                                                                                                                                                                                                                                 |      |               |       |                                                                                                                                                                                                                                               |      |              |              |       |
| 18-29                                       | 644                                                                                                                                                                                                                             | 78.2 | 11.885 (6)    | .065  | 459                                                                                                                                                                                                                                           | ref  |              |              | .850  |
| 30-39 v 18-29                               | 643                                                                                                                                                                                                                             | 75.6 |               |       | 759                                                                                                                                                                                                                                           | 0.86 | 0.63         | 1.17         | .323  |
| 40-49 v 18-39                               | 631                                                                                                                                                                                                                             | 78.6 |               |       | 835                                                                                                                                                                                                                                           | 1.06 | 0.84         | 1.34         | .640  |
| 50-59 v 18-49                               | 677                                                                                                                                                                                                                             | 78.1 |               |       | 896                                                                                                                                                                                                                                           | 1.09 | 0.88         | 1.36         | .426  |
| 60-69 v 18-59                               | 572                                                                                                                                                                                                                             | 80.5 |               |       | 1004                                                                                                                                                                                                                                          | 1.03 | 0.84         | 1.26         | .785  |
| 70-79 v 18-69                               | 540                                                                                                                                                                                                                             | 82.2 |               |       | 763                                                                                                                                                                                                                                           | 1.05 | 0.84         | 1.32         | .654  |
| 80+ v 18-79                                 | 166                                                                                                                                                                                                                             | 76.1 |               |       | 176                                                                                                                                                                                                                                           | 1.10 | 0.72         | 1.68         | .650  |
| <b>Education/Highest qualification</b>      |                                                                                                                                                                                                                                 |      |               |       |                                                                                                                                                                                                                                               |      |              |              |       |
| No qualifications                           | 389                                                                                                                                                                                                                             | 63.1 | 147.739 (4)   | <.001 | 410                                                                                                                                                                                                                                           | ref  |              |              | <.001 |
| Degree or equivalent and above              | 1743                                                                                                                                                                                                                            | 84.1 |               |       | 2453                                                                                                                                                                                                                                          | 3.21 | 2.50         | 4.13         | <.001 |
| A levels / Vocational level 3 or equivalent | 905                                                                                                                                                                                                                             | 80.0 |               |       | 990                                                                                                                                                                                                                                           | 2.70 | 2.04         | 3.55         | <.001 |
| Other qual'ns below A level / Voc level 3   | 653                                                                                                                                                                                                                             | 77.8 |               |       | 784                                                                                                                                                                                                                                           | 1.98 | 1.51         | 2.61         | <.001 |
| Other qualification                         | 205                                                                                                                                                                                                                             | 67.7 |               |       | 255                                                                                                                                                                                                                                           | 1.23 | 0.87         | 1.73         | .245  |
| <b>Financial Status</b>                     |                                                                                                                                                                                                                                 |      |               |       |                                                                                                                                                                                                                                               |      |              |              |       |
| Living comfortably                          | 1110                                                                                                                                                                                                                            | 86.4 | 154.081 (4)   | <.001 | 1532                                                                                                                                                                                                                                          | ref  |              |              | <.001 |
| Doing alright                               | 1640                                                                                                                                                                                                                            | 80.6 |               |       | 1997                                                                                                                                                                                                                                          | 0.65 | 0.53         | 0.80         | <.001 |
| Just about getting by                       | 797                                                                                                                                                                                                                             | 70.4 |               |       | 960                                                                                                                                                                                                                                           | 0.46 | 0.36         | 0.58         | <.001 |
| Finding it quite difficult                  | 249                                                                                                                                                                                                                             | 73.9 |               |       | 266                                                                                                                                                                                                                                           | 0.51 | 0.36         | 0.72         | <.001 |
| Finding it very difficult                   | 97                                                                                                                                                                                                                              | 55.7 |               |       | 137                                                                                                                                                                                                                                           | 0.32 | 0.21         | 0.48         | <.001 |
| <b>Country</b>                              |                                                                                                                                                                                                                                 |      |               |       |                                                                                                                                                                                                                                               |      |              |              |       |
| England                                     | 3375                                                                                                                                                                                                                            | 78.8 | 3.260 (2)     | .196  | 4300                                                                                                                                                                                                                                          | ref  |              |              | .068  |
| Scotland                                    | 341                                                                                                                                                                                                                             | 77.0 |               |       | 384                                                                                                                                                                                                                                           | 1.03 | 0.77         | 1.37         | .843  |
| Wales                                       | 176                                                                                                                                                                                                                             | 74.3 |               |       | 208                                                                                                                                                                                                                                           | 0.67 | 0.47         | 0.94         | .022  |
| <b>Urban/rural</b>                          |                                                                                                                                                                                                                                 |      |               |       |                                                                                                                                                                                                                                               |      |              |              |       |
| Urban                                       | 3108                                                                                                                                                                                                                            | 77.7 | 5.368 (1)     | .021  | 3727                                                                                                                                                                                                                                          |      |              |              |       |
| Rural                                       | 783                                                                                                                                                                                                                             | 81.1 |               |       | 1165                                                                                                                                                                                                                                          | 1.00 | 0.83         | 1.20         | .978  |
| <b>Ethnicity</b>                            |                                                                                                                                                                                                                                 |      |               |       |                                                                                                                                                                                                                                               |      |              |              |       |
| White British                               | 3236                                                                                                                                                                                                                            | 80.9 | 87.036 (5)    | <.001 | 4225                                                                                                                                                                                                                                          | ref  |              |              | <.001 |
| Any other white background                  | 244                                                                                                                                                                                                                             | 72.8 |               |       | 318                                                                                                                                                                                                                                           | 0.56 | 0.42         | 0.75         | <.001 |
| Mixed or multiple ethnic groups             | 68                                                                                                                                                                                                                              | 70.8 |               |       | 62                                                                                                                                                                                                                                            | 0.51 | 0.28         | 0.92         | .025  |
| Asian or Asian British                      | 203                                                                                                                                                                                                                             | 66.6 |               |       | 160                                                                                                                                                                                                                                           | 0.46 | 0.32         | 0.67         | <.001 |
| Black or Black British                      | 57                                                                                                                                                                                                                              | 56.4 |               |       | 67                                                                                                                                                                                                                                            | 0.31 | 0.19         | 0.53         | <.001 |
| Other                                       | 53                                                                                                                                                                                                                              | 65.4 |               |       | 60                                                                                                                                                                                                                                            | 0.43 | 0.24         | 0.76         | .004  |
|                                             |                                                                                                                                                                                                                                 |      |               |       | Hosmer & Lemeshow $\chi^2= 5.496$ , df=8, p=0.704.<br>Final model $\chi^2=268.594$ , df=24, p<0.001<br>Nagelkerke = .087<br>Cases correctly classified: 82.1%.<br>86 cases excluded due to missing data on one or more independent variables. |      |              |              |       |

\* adjusted for all other variables in the model, AOR, adjusted odds ratio; ref, reference category; 95% CI, 95% confidence interval.

**Table S9 The World Health Organisation (WHO) – Association between trust in sources of information about COVID-19 vaccine and socio-demographic variables – (a) bivariate results and (b) multivariate logistic regression.**

|                                                                                                   | (a) Bivariate associations between socio-demographics and trusting COVID-19 vaccine info from The World Health Organisation (WHO) |      |               |       | (b) Logistic regression of trust in COVID-19 vaccine info from The World Health Organisation (WHO)                                                                                                                                                        |      |              |              |       |
|---------------------------------------------------------------------------------------------------|-----------------------------------------------------------------------------------------------------------------------------------|------|---------------|-------|-----------------------------------------------------------------------------------------------------------------------------------------------------------------------------------------------------------------------------------------------------------|------|--------------|--------------|-------|
|                                                                                                   | n                                                                                                                                 | %    | $\chi^2$ (df) | P     | N                                                                                                                                                                                                                                                         | AOR* | 95% CI Lower | 95% CI Upper | P     |
| 1 = Trust completely or a great deal (3423), 0 = Trust somewhat, very little or not at all (1468) |                                                                                                                                   |      |               |       |                                                                                                                                                                                                                                                           |      |              |              |       |
| <b>Gender</b>                                                                                     |                                                                                                                                   |      |               |       |                                                                                                                                                                                                                                                           |      |              |              |       |
| Male                                                                                              | 1523                                                                                                                              | 63.7 | 23.303#       | <.001 | 2097                                                                                                                                                                                                                                                      | ref  |              |              | <.001 |
| Female                                                                                            | 1797                                                                                                                              | 70.1 |               |       | 2785                                                                                                                                                                                                                                                      | 1.49 | 1.31         | 1.69         | <.001 |
| Other                                                                                             | 5                                                                                                                                 | 71.4 |               |       | 9                                                                                                                                                                                                                                                         | 1.92 | 0.39         | 9.42         | .420  |
| <b>Age</b>                                                                                        |                                                                                                                                   |      |               |       |                                                                                                                                                                                                                                                           |      |              |              |       |
| 18-29                                                                                             | 556                                                                                                                               | 68.1 | 5.005 (6)     | .543  | 458                                                                                                                                                                                                                                                       | ref  |              |              | .177  |
| 30-39 v 18-29                                                                                     | 549                                                                                                                               | 64.5 |               |       | 760                                                                                                                                                                                                                                                       | 0.84 | 0.65         | 1.10         | .203  |
| 40-49 v 18-39                                                                                     | 538                                                                                                                               | 67.1 |               |       | 835                                                                                                                                                                                                                                                       | 0.98 | 0.81         | 1.20         | .882  |
| 50-59 v 18-49                                                                                     | 593                                                                                                                               | 68.4 |               |       | 896                                                                                                                                                                                                                                                       | 1.15 | 0.96         | 1.39         | .126  |
| 60-69 v 18-59                                                                                     | 484                                                                                                                               | 68.1 |               |       | 1004                                                                                                                                                                                                                                                      | 0.89 | 0.76         | 1.06         | .189  |
| 70-79 v 18-69                                                                                     | 450                                                                                                                               | 68.6 |               |       | 762                                                                                                                                                                                                                                                       | 0.87 | 0.73         | 1.04         | .127  |
| 80+ v 18-79                                                                                       | 140                                                                                                                               | 64.8 |               |       | 176                                                                                                                                                                                                                                                       | 0.86 | 0.62         | 1.20         | .366  |
| <b>Education/Highest qualification</b>                                                            |                                                                                                                                   |      |               |       |                                                                                                                                                                                                                                                           |      |              |              |       |
| No qualifications                                                                                 | 351                                                                                                                               | 56.9 | 75.592 (4)    | <.001 | 410                                                                                                                                                                                                                                                       | ref  |              |              | <.001 |
| Degree or equivalent and above                                                                    | 1490                                                                                                                              | 72.3 |               |       | 2452                                                                                                                                                                                                                                                      | 1.73 | 1.38         | 2.18         | <.001 |
| A levels / Vocational level 3 or equivalent                                                       | 758                                                                                                                               | 67.0 |               |       | 990                                                                                                                                                                                                                                                       | 1.39 | 1.08         | 1.77         | .010  |
| Other qual'ns below A level / Voc level 3                                                         | 561                                                                                                                               | 66.9 |               |       | 784                                                                                                                                                                                                                                                       | 1.36 | 1.06         | 1.76         | .017  |
| Other qualification                                                                               | 166                                                                                                                               | 54.6 |               |       | 255                                                                                                                                                                                                                                                       | 0.88 | 0.64         | 1.21         | .428  |
| <b>Financial Status</b>                                                                           |                                                                                                                                   |      |               |       |                                                                                                                                                                                                                                                           |      |              |              |       |
| Living comfortably                                                                                | 953                                                                                                                               | 74.2 | 67.486 (4)    | <.001 | 1533                                                                                                                                                                                                                                                      | ref  |              |              | <.001 |
| Doing alright                                                                                     | 1384                                                                                                                              | 68.2 |               |       | 1995                                                                                                                                                                                                                                                      | 0.78 | 0.66         | 0.91         | .002  |
| Just about getting by                                                                             | 691                                                                                                                               | 61.0 |               |       | 960                                                                                                                                                                                                                                                       | 0.60 | 0.50         | 0.73         | <.001 |
| Finding it quite difficult                                                                        | 204                                                                                                                               | 60.4 |               |       | 266                                                                                                                                                                                                                                                       | 0.56 | 0.42         | 0.75         | <.001 |
| Finding it very difficult                                                                         | 92                                                                                                                                | 54.8 |               |       | 137                                                                                                                                                                                                                                                       | 0.45 | 0.31         | 0.65         | <.001 |
| <b>Country</b>                                                                                    |                                                                                                                                   |      |               |       |                                                                                                                                                                                                                                                           |      |              |              |       |
| England                                                                                           | 2880                                                                                                                              | 67.4 | 2.028 (2)     | .363  | -                                                                                                                                                                                                                                                         | -    | -            | -            | -     |
| Scotland                                                                                          | 283                                                                                                                               | 64.0 |               |       | -                                                                                                                                                                                                                                                         | -    | -            | -            | -     |
| Wales                                                                                             | 160                                                                                                                               | 67.5 |               |       | -                                                                                                                                                                                                                                                         | -    | -            | -            | -     |
| <b>Urban/rural</b>                                                                                |                                                                                                                                   |      |               |       |                                                                                                                                                                                                                                                           |      |              |              |       |
| Urban                                                                                             | 2663                                                                                                                              | 66.7 | 1.288 (1)     | .256  | 3727                                                                                                                                                                                                                                                      |      |              |              |       |
| Rural                                                                                             | 660                                                                                                                               | 68.6 |               |       | 1164                                                                                                                                                                                                                                                      | 0.99 | 0.85         | 1.15         | .897  |
| <b>Ethnicity</b>                                                                                  |                                                                                                                                   |      |               |       |                                                                                                                                                                                                                                                           |      |              |              |       |
| White British                                                                                     | 2737                                                                                                                              | 68.5 | 30.713 (5)    | <.001 | 4224                                                                                                                                                                                                                                                      | ref  |              |              | <.001 |
| Any other white background                                                                        | 223                                                                                                                               | 66.4 |               |       | 318                                                                                                                                                                                                                                                       | 0.75 | 0.58         | 0.96         | .023  |
| Mixed or multiple ethnic groups                                                                   | 59                                                                                                                                | 61.5 |               |       | 62                                                                                                                                                                                                                                                        | 0.63 | 0.37         | 1.07         | .089  |
| Asian or Asian British                                                                            | 171                                                                                                                               | 57.2 |               |       | 160                                                                                                                                                                                                                                                       | 0.64 | 0.46         | 0.90         | .010  |
| Black or Black British                                                                            | 55                                                                                                                                | 53.9 |               |       | 67                                                                                                                                                                                                                                                        | 0.44 | 0.27         | 0.72         | .001  |
| Other                                                                                             | 45                                                                                                                                | 56.3 |               |       | 60                                                                                                                                                                                                                                                        | 0.61 | 0.36         | 1.04         | .068  |
|                                                                                                   |                                                                                                                                   |      |               |       | Hosmer & Lemeshow $\chi^2= 14.933$ , $df=8$ , $p=0.060$ .<br>Final model $\chi^2=172.240$ , $df=22$ , $p<0.001$<br>Nagelkerke = .049<br>Cases correctly classified: 70.0%.<br>87 cases excluded due to missing data on one or more independent variables. |      |              |              |       |

\* adjusted for all other variables in the model, AOR, adjusted odds ratio; ref, reference category; 95% CI, 95% confidence interval. # Fisher-Freeman-Halton Exact Test. Country was excluded from the logistic regression to achieve model fit.

**Table S10 The media (e.g. newspapers, magazines, television, radio) – Association between trust in sources of information about COVID-19 vaccine and socio-demographic variables – (a) bivariate results and (b) multivariate logistic regression.**

|                                             | (a) Bivariate associations between socio-demographics and trusting COVID-19 vaccine info from the media<br>% Trust completely or a great deal (weighted)<br>$\chi^2$ test for differences by demographics |      |               |       | (b) Logistic regression of trust in COVID-19 vaccine info from the media<br>1 = Trust completely or a great deal (361), 0 = Trust somewhat, very little or not at all (4530)                                                                |      |              |              |       |
|---------------------------------------------|-----------------------------------------------------------------------------------------------------------------------------------------------------------------------------------------------------------|------|---------------|-------|---------------------------------------------------------------------------------------------------------------------------------------------------------------------------------------------------------------------------------------------|------|--------------|--------------|-------|
|                                             | n                                                                                                                                                                                                         | %    | $\chi^2$ (df) | P     | N                                                                                                                                                                                                                                           | AOR* | 95% CI Lower | 95% CI Upper | P     |
| <b>Gender</b>                               |                                                                                                                                                                                                           |      |               |       |                                                                                                                                                                                                                                             |      |              |              |       |
| Male                                        | 176                                                                                                                                                                                                       | 7.3  | 2.193 (2)     | .334  | 2097                                                                                                                                                                                                                                        |      |              |              | .575  |
| Female                                      | 213                                                                                                                                                                                                       | 8.3  |               |       | 2785                                                                                                                                                                                                                                        | 1.13 | 0.90         | 1.41         | .293  |
| Other                                       | 0                                                                                                                                                                                                         | 0.0  |               |       | 9                                                                                                                                                                                                                                           | 0.00 | 0.00         |              | .999  |
| <b>Age</b>                                  |                                                                                                                                                                                                           |      |               |       |                                                                                                                                                                                                                                             |      |              |              |       |
| 18-29                                       | 57                                                                                                                                                                                                        | 6.9  | 39.450 (6)    | <.001 | 459                                                                                                                                                                                                                                         |      |              |              | .003  |
| 30-39 v 18-29                               | 57                                                                                                                                                                                                        | 6.7  |               |       | 759                                                                                                                                                                                                                                         | 0.84 | 0.52         | 1.35         | .462  |
| 40-49 v 18-39                               | 52                                                                                                                                                                                                        | 6.5  |               |       | 834                                                                                                                                                                                                                                         | 1.04 | 0.72         | 1.49         | .848  |
| 50-59 v 18-49                               | 58                                                                                                                                                                                                        | 6.7  |               |       | 895                                                                                                                                                                                                                                         | 1.08 | 0.78         | 1.50         | .629  |
| 60-69 v 18-59                               | 49                                                                                                                                                                                                        | 6.9  |               |       | 1004                                                                                                                                                                                                                                        | 1.05 | 0.77         | 1.42         | .761  |
| 70-79 v 18-69                               | 85                                                                                                                                                                                                        | 12.9 |               |       | 763                                                                                                                                                                                                                                         | 1.75 | 1.32         | 2.33         | <.001 |
| 80+ v 18-79                                 | 29                                                                                                                                                                                                        | 13.3 |               |       | 177                                                                                                                                                                                                                                         | 1.74 | 1.07         | 2.83         | .024  |
| <b>Education/Highest qualification</b>      |                                                                                                                                                                                                           |      |               |       |                                                                                                                                                                                                                                             |      |              |              |       |
| No qualifications                           | 77                                                                                                                                                                                                        | 12.5 | 34.152 (4)    | <.001 | 409                                                                                                                                                                                                                                         |      |              |              | .005  |
| Degree or equivalent and above              | 153                                                                                                                                                                                                       | 7.4  |               |       | 2454                                                                                                                                                                                                                                        | 0.63 | 0.44         | 0.90         | .011  |
| A levels / Vocational level 3 or equivalent | 58                                                                                                                                                                                                        | 5.1  |               |       | 990                                                                                                                                                                                                                                         | 0.44 | 0.29         | 0.68         | <.001 |
| Other qual'ns below A level / Voc level 3   | 79                                                                                                                                                                                                        | 9.4  |               |       | 784                                                                                                                                                                                                                                         | 0.72 | 0.48         | 1.07         | .102  |
| Other qualification                         | 21                                                                                                                                                                                                        | 7.0  |               |       | 254                                                                                                                                                                                                                                         | 0.56 | 0.31         | 1.00         | .051  |
| <b>Financial Status</b>                     |                                                                                                                                                                                                           |      |               |       |                                                                                                                                                                                                                                             |      |              |              |       |
| Living comfortably                          | 105                                                                                                                                                                                                       | 8.2  | 34.041 (4)    | <.001 | 1533                                                                                                                                                                                                                                        |      |              |              | .671  |
| Doing alright                               | 122                                                                                                                                                                                                       | 6.0  |               |       | 1996                                                                                                                                                                                                                                        | 0.90 | 0.69         | 1.16         | .413  |
| Just about getting by                       | 99                                                                                                                                                                                                        | 8.8  |               |       | 959                                                                                                                                                                                                                                         | 1.01 | 0.73         | 1.39         | .974  |
| Finding it quite difficult                  | 33                                                                                                                                                                                                        | 9.8  |               |       | 266                                                                                                                                                                                                                                         | 1.22 | 0.75         | 1.98         | .430  |
| Finding it very difficult                   | 30                                                                                                                                                                                                        | 17.2 |               |       | 137                                                                                                                                                                                                                                         | 0.79 | 0.37         | 1.68         | .535  |
| <b>Country</b>                              |                                                                                                                                                                                                           |      |               |       |                                                                                                                                                                                                                                             |      |              |              |       |
| England                                     | 336                                                                                                                                                                                                       | 7.8  | .515 (2)      | .773  | 4300                                                                                                                                                                                                                                        |      |              |              | .457  |
| Scotland                                    | 32                                                                                                                                                                                                        | 7.3  |               |       | 383                                                                                                                                                                                                                                         | 0.79 | 0.51         | 1.24         | .313  |
| Wales                                       | 21                                                                                                                                                                                                        | 8.8  |               |       | 208                                                                                                                                                                                                                                         | 1.19 | 0.71         | 2.00         | .499  |
| <b>Urban/rural</b>                          |                                                                                                                                                                                                           |      |               |       |                                                                                                                                                                                                                                             |      |              |              |       |
| Urban                                       | 323                                                                                                                                                                                                       | 8.1  | 1.957 (1)     | .162  | 3726                                                                                                                                                                                                                                        |      |              |              |       |
| Rural                                       | 65                                                                                                                                                                                                        | 6.7  |               |       | 1165                                                                                                                                                                                                                                        | 0.91 | 0.70         | 1.19         | .486  |
| <b>Ethnicity</b>                            |                                                                                                                                                                                                           |      |               |       |                                                                                                                                                                                                                                             |      |              |              |       |
| White British                               | 296                                                                                                                                                                                                       | 7.4  | 6.645 (5)     | .248  | 4226                                                                                                                                                                                                                                        |      |              |              | .073  |
| Any other white background                  | 30                                                                                                                                                                                                        | 9.0  |               |       | 318                                                                                                                                                                                                                                         | 1.55 | 1.03         | 2.32         | .035  |
| Mixed or multiple ethnic groups             | 6                                                                                                                                                                                                         | 6.2  |               |       | 62                                                                                                                                                                                                                                          | 1.31 | 0.52         | 3.33         | .570  |
| Asian or Asian British                      | 30                                                                                                                                                                                                        | 9.9  |               |       | 160                                                                                                                                                                                                                                         | 1.73 | 1.02         | 2.94         | .043  |
| Black or Black British                      | 12                                                                                                                                                                                                        | 11.9 |               |       | 66                                                                                                                                                                                                                                          | 1.84 | 0.82         | 4.12         | .139  |
| Other                                       | 8                                                                                                                                                                                                         | 10.3 |               |       | 59                                                                                                                                                                                                                                          | 1.62 | 0.68         | 3.85         | .274  |
|                                             |                                                                                                                                                                                                           |      |               |       | Hosmer & Lemeshow $\chi^2=2.359$ , df=8, p=0.968.<br>Final model $\chi^2=54.051$ , df=24, p<0.001<br>Nagelkerke = .027<br>Cases correctly classified: 92.6%.<br>87 cases excluded due to missing data on one or more independent variables. |      |              |              |       |

\* adjusted for all other variables in the model, AOR, adjusted odds ratio; ref, reference category; 95% CI, 95% confidence interval.

**Table S11 Social media – Association between trust in sources of information about COVID-19 vaccine and socio-demographic variables – (a) bivariate results and (b) multivariate logistic regression.**

|                                             | (a) Bivariate associations between socio-demographics and trusting COVID-19 vaccine info from social media<br>% Trust completely or a great deal (weighted)<br>$\chi^2$ test for differences by demographics |     |               |       | (b) Logistic regression of trust in COVID-19 vaccine info from social media<br>1 = Trust completely or a great deal (95), 0 = Trust somewhat, very little or not at all (4792)                                                               |      |              |              |       |
|---------------------------------------------|--------------------------------------------------------------------------------------------------------------------------------------------------------------------------------------------------------------|-----|---------------|-------|----------------------------------------------------------------------------------------------------------------------------------------------------------------------------------------------------------------------------------------------|------|--------------|--------------|-------|
|                                             | n                                                                                                                                                                                                            | %   | $\chi^2$ (df) | P     | N                                                                                                                                                                                                                                            | AOR* | 95% CI Lower | 95% CI Upper | P     |
| <b>Gender</b>                               |                                                                                                                                                                                                              |     |               |       |                                                                                                                                                                                                                                              |      |              |              |       |
| Male                                        | 63                                                                                                                                                                                                           | 2.6 | 0.284 (2)     | .868  | 2094                                                                                                                                                                                                                                         | ref  |              |              | .845  |
| Female                                      | 71                                                                                                                                                                                                           | 2.8 |               |       | 2784                                                                                                                                                                                                                                         | 1.13 | 0.74         | 1.73         | .561  |
| Other                                       | 0                                                                                                                                                                                                            | 0.0 |               |       | 9                                                                                                                                                                                                                                            | 0.00 | 0.00         |              | .999  |
| <b>Age</b>                                  |                                                                                                                                                                                                              |     |               |       |                                                                                                                                                                                                                                              |      |              |              |       |
| 18-29                                       | 31                                                                                                                                                                                                           | 3.8 | 12.626 (6)    | .049  | 459                                                                                                                                                                                                                                          | ref  |              |              | .634  |
| 30-39 v 18-29                               | 25                                                                                                                                                                                                           | 2.9 |               |       | 759                                                                                                                                                                                                                                          | 0.55 | 0.24         | 1.22         | .139  |
| 40-49 v 18-39                               | 22                                                                                                                                                                                                           | 2.7 |               |       | 835                                                                                                                                                                                                                                          | 0.89 | 0.47         | 1.67         | .713  |
| 50-59 v 18-49                               | 13                                                                                                                                                                                                           | 1.5 |               |       | 896                                                                                                                                                                                                                                          | 0.85 | 0.47         | 1.55         | .596  |
| 60-69 v 18-59                               | 13                                                                                                                                                                                                           | 1.8 |               |       | 1003                                                                                                                                                                                                                                         | 0.71 | 0.39         | 1.29         | .259  |
| 70-79 v 18-69                               | 19                                                                                                                                                                                                           | 2.9 |               |       | 761                                                                                                                                                                                                                                          | 1.11 | 0.62         | 1.97         | .727  |
| 80+ v 18-79                                 | 9                                                                                                                                                                                                            | 4.2 |               |       | 174                                                                                                                                                                                                                                          | 1.26 | 0.49         | 3.25         | .631  |
| <b>Education/Highest qualification</b>      |                                                                                                                                                                                                              |     |               |       |                                                                                                                                                                                                                                              |      |              |              |       |
| No qualifications                           | 31                                                                                                                                                                                                           | 5.1 | 24.978 (4)    | <.001 | 409                                                                                                                                                                                                                                          | ref  |              |              | <.001 |
| Degree or equivalent and above              | 44                                                                                                                                                                                                           | 2.1 |               |       | 2452                                                                                                                                                                                                                                         | 0.24 | 0.13         | 0.44         | <.001 |
| A levels / Vocational level 3 or equivalent | 18                                                                                                                                                                                                           | 1.6 |               |       | 989                                                                                                                                                                                                                                          | 0.32 | 0.16         | 0.64         | .001  |
| Other qual'ns below A level / Voc level 3   | 32                                                                                                                                                                                                           | 3.8 |               |       | 782                                                                                                                                                                                                                                          | 0.50 | 0.26         | 0.94         | .031  |
| Other qualification                         | 8                                                                                                                                                                                                            | 2.6 |               |       | 255                                                                                                                                                                                                                                          | 0.46 | 0.18         | 1.18         | .106  |
| <b>Financial Status</b>                     |                                                                                                                                                                                                              |     |               |       |                                                                                                                                                                                                                                              |      |              |              |       |
| Living comfortably                          | 34                                                                                                                                                                                                           | 2.6 | 26.413 (4)    | <.001 | 1531                                                                                                                                                                                                                                         | ref  |              |              | .522  |
| Doing alright                               | 38                                                                                                                                                                                                           | 1.9 |               |       | 1994                                                                                                                                                                                                                                         | 0.73 | 0.43         | 1.24         | .241  |
| Just about getting by                       | 35                                                                                                                                                                                                           | 3.1 |               |       | 959                                                                                                                                                                                                                                          | 0.99 | 0.55         | 1.79         | .976  |
| Finding it quite difficult                  | 12                                                                                                                                                                                                           | 3.6 |               |       | 266                                                                                                                                                                                                                                          | 1.35 | 0.60         | 3.04         | .473  |
| Finding it very difficult                   | 14                                                                                                                                                                                                           | 8.1 |               |       | 137                                                                                                                                                                                                                                          | 0.81 | 0.23         | 2.84         | .746  |
| <b>Country</b>                              |                                                                                                                                                                                                              |     |               |       |                                                                                                                                                                                                                                              |      |              |              |       |
| England                                     | 118                                                                                                                                                                                                          | 2.8 | .404(2)       | .817  | 4295                                                                                                                                                                                                                                         | ref  |              |              | .215  |
| Scotland                                    | 10                                                                                                                                                                                                           | 2.3 |               |       | 384                                                                                                                                                                                                                                          | 0.40 | 0.12         | 1.27         | .120  |
| Wales                                       | 6                                                                                                                                                                                                            | 2.5 |               |       | 208                                                                                                                                                                                                                                          | 1.42 | 0.56         | 3.58         | .463  |
| <b>Urban/rural</b>                          |                                                                                                                                                                                                              |     |               |       |                                                                                                                                                                                                                                              |      |              |              |       |
| Urban                                       | 122                                                                                                                                                                                                          | 3.1 | 9.660(1)      | .002  | 3724                                                                                                                                                                                                                                         |      |              |              |       |
| Rural                                       | 12                                                                                                                                                                                                           | 1.2 |               |       | 1163                                                                                                                                                                                                                                         | 0.57 | 0.31         | 1.05         | .071  |
| <b>Ethnicity</b>                            |                                                                                                                                                                                                              |     |               |       |                                                                                                                                                                                                                                              |      |              |              |       |
| White British                               | 94                                                                                                                                                                                                           | 2.4 | 17.781#       | .002  | 4220                                                                                                                                                                                                                                         | ref  |              |              | .326  |
| Any other white background                  | 7                                                                                                                                                                                                            | 2.1 |               |       | 318                                                                                                                                                                                                                                          | 1.00 | 0.39         | 2.53         | .994  |
| Mixed or multiple ethnic groups             | 4                                                                                                                                                                                                            | 4.1 |               |       | 62                                                                                                                                                                                                                                           | 2.52 | 0.75         | 8.45         | .134  |
| Asian or Asian British                      | 14                                                                                                                                                                                                           | 4.6 |               |       | 160                                                                                                                                                                                                                                          | 1.85 | 0.77         | 4.45         | .172  |
| Black or Black British                      | 9                                                                                                                                                                                                            | 8.8 |               |       | 69                                                                                                                                                                                                                                           | 2.57 | 0.76         | 8.64         | .128  |
| Other                                       | 1                                                                                                                                                                                                            | 1.2 |               |       | 60                                                                                                                                                                                                                                           | 0.83 | 0.11         | 6.20         | .855  |
|                                             |                                                                                                                                                                                                              |     |               |       | Hosmer & Lemeshow $\chi^2= 5.858$ , df=8, p=0.663.<br>Final model $\chi^2=46.839$ , df=24, p=0.004<br>Nagelkerke = .055<br>Cases correctly classified: 98.1%.<br>91 cases excluded due to missing data on one or more independent variables. |      |              |              |       |

\* adjusted for all other variables in the model, AOR, adjusted odds ratio; ref, reference category; 95% CI, 95% confidence interval. # Fisher-Freeman-Halton Exact Test.

**Table S12 Celebrities and social media influencers – Association between trust in sources of information about COVID-19 vaccine and socio-demographic variables – (a) bivariate results and (b) multivariate logistic regression.**

|                                             | (a) Bivariate associations between socio-demographics and trusting COVID-19 vaccine info from celebrities and social media influencers<br>% Trust completely or a great deal (weighted)<br>$\chi^2$ test for differences by demographics |     |                     |       | (b) Logistic regression of trust in COVID-19 vaccine info from celebrities and social media influencers<br>1 = Trust completely or a great deal (95), 0 = Trust somewhat, very little or not at all (4795)                                  |      |              |              |       |
|---------------------------------------------|------------------------------------------------------------------------------------------------------------------------------------------------------------------------------------------------------------------------------------------|-----|---------------------|-------|---------------------------------------------------------------------------------------------------------------------------------------------------------------------------------------------------------------------------------------------|------|--------------|--------------|-------|
|                                             | n                                                                                                                                                                                                                                        | %   | $\chi^2$ (df)       | P     | N                                                                                                                                                                                                                                           | AOR* | 95% CI Lower | 95% CI Upper | P     |
| <b>Gender</b>                               |                                                                                                                                                                                                                                          |     |                     |       |                                                                                                                                                                                                                                             |      |              |              |       |
| Male                                        | 57                                                                                                                                                                                                                                       | 2.4 | 1.430 (2)           | .489  | 2097                                                                                                                                                                                                                                        | ref  |              |              | .996  |
| Female                                      | 74                                                                                                                                                                                                                                       | 2.9 |                     |       | 2784                                                                                                                                                                                                                                        | 0.98 | 0.65         | 1.49         | .928  |
| Other                                       | 0                                                                                                                                                                                                                                        | 0.0 |                     |       | 9                                                                                                                                                                                                                                           | 0.00 | 0.00         |              | .999  |
| <b>Age</b>                                  |                                                                                                                                                                                                                                          |     |                     |       |                                                                                                                                                                                                                                             |      |              |              |       |
| 18-29                                       | 24                                                                                                                                                                                                                                       | 2.9 | 19.156 (6)          | .004  | 459                                                                                                                                                                                                                                         | ref  |              |              | .348  |
| 30-39 v 18-29                               | 25                                                                                                                                                                                                                                       | 3.0 |                     |       | 758                                                                                                                                                                                                                                         | 0.90 | 0.37         | 2.21         | .818  |
| 40-49 v 18-39                               | 23                                                                                                                                                                                                                                       | 2.9 |                     |       | 835                                                                                                                                                                                                                                         | 1.11 | 0.58         | 2.14         | .744  |
| 50-59 v 18-49                               | 18                                                                                                                                                                                                                                       | 2.1 |                     |       | 895                                                                                                                                                                                                                                         | 1.28 | 0.73         | 2.25         | .390  |
| 60-69 v 18-59                               | 9                                                                                                                                                                                                                                        | 1.3 |                     |       | 1004                                                                                                                                                                                                                                        | 0.65 | 0.34         | 1.25         | .192  |
| 70-79 v 18-69                               | 17                                                                                                                                                                                                                                       | 2.6 |                     |       | 762                                                                                                                                                                                                                                         | 1.26 | 0.70         | 2.28         | .441  |
| 80+ v 18-79                                 | 14                                                                                                                                                                                                                                       | 6.4 |                     |       | 177                                                                                                                                                                                                                                         | 2.18 | 0.96         | 4.98         | .064  |
| <b>Education/Highest qualification</b>      |                                                                                                                                                                                                                                          |     |                     |       |                                                                                                                                                                                                                                             |      |              |              |       |
| No qualifications                           | 35                                                                                                                                                                                                                                       | 5.7 | 58.886 (4)          | <.001 | 409                                                                                                                                                                                                                                         | ref  |              |              | .002  |
| Degree or equivalent and above              | 32                                                                                                                                                                                                                                       | 1.5 |                     |       | 2453                                                                                                                                                                                                                                        | 0.31 | 0.17         | 0.58         | <.001 |
| A levels / Vocational level 3 or equivalent | 13                                                                                                                                                                                                                                       | 1.1 |                     |       | 990                                                                                                                                                                                                                                         | 0.31 | 0.15         | 0.65         | .002  |
| Other qual'ns below A level / Voc level 3   | 41                                                                                                                                                                                                                                       | 4.9 |                     |       | 783                                                                                                                                                                                                                                         | 0.59 | 0.31         | 1.11         | .103  |
| Other qualification                         | 10                                                                                                                                                                                                                                       | 3.3 |                     |       | 255                                                                                                                                                                                                                                         | 0.57 | 0.24         | 1.40         | .221  |
| <b>Financial Status</b>                     |                                                                                                                                                                                                                                          |     |                     |       |                                                                                                                                                                                                                                             |      |              |              |       |
| Living comfortably                          | 23                                                                                                                                                                                                                                       | 1.8 | 53.820 (4)          | <.001 | 1533                                                                                                                                                                                                                                        | ref  |              |              | .022  |
| Doing alright                               | 27                                                                                                                                                                                                                                       | 1.3 |                     |       | 1995                                                                                                                                                                                                                                        | 1.01 | 0.56         | 1.82         | .975  |
| Just about getting by                       | 59                                                                                                                                                                                                                                       | 5.2 |                     |       | 959                                                                                                                                                                                                                                         | 2.08 | 1.13         | 3.80         | .018  |
| Finding it quite difficult                  | 11                                                                                                                                                                                                                                       | 3.3 |                     |       | 266                                                                                                                                                                                                                                         | 2.47 | 1.08         | 5.64         | .032  |
| Finding it very difficult                   | 10                                                                                                                                                                                                                                       | 5.7 |                     |       | 137                                                                                                                                                                                                                                         | 1.86 | 0.60         | 5.77         | .284  |
| <b>Country</b>                              |                                                                                                                                                                                                                                          |     |                     |       |                                                                                                                                                                                                                                             |      |              |              |       |
| England                                     | 117                                                                                                                                                                                                                                      | 2.7 | 11.948 (2)          | .003  | 4299                                                                                                                                                                                                                                        | ref  |              |              | .028  |
| Scotland                                    | 3                                                                                                                                                                                                                                        | 0.7 |                     |       | 383                                                                                                                                                                                                                                         | 0.40 | 0.13         | 1.29         | .127  |
| Wales                                       | 12                                                                                                                                                                                                                                       | 5.0 |                     |       | 208                                                                                                                                                                                                                                         | 2.26 | 1.06         | 4.82         | .036  |
| <b>Urban/rural</b>                          |                                                                                                                                                                                                                                          |     |                     |       |                                                                                                                                                                                                                                             |      |              |              |       |
| Urban                                       | 119                                                                                                                                                                                                                                      | 3.0 | 9.096 (1)           | .003  | 3725                                                                                                                                                                                                                                        |      |              |              |       |
| Rural                                       | 12                                                                                                                                                                                                                                       | 1.2 |                     |       | 1165                                                                                                                                                                                                                                        | 0.64 | 0.36         | 1.14         | .133  |
| <b>Ethnicity</b>                            |                                                                                                                                                                                                                                          |     |                     |       |                                                                                                                                                                                                                                             |      |              |              |       |
| White British                               | 94                                                                                                                                                                                                                                       | 2.4 | 14.208 <sup>#</sup> | .008  | 4224                                                                                                                                                                                                                                        | ref  |              |              | .574  |
| Any other white background                  | 11                                                                                                                                                                                                                                       | 3.3 |                     |       | 318                                                                                                                                                                                                                                         | 1.62 | 0.75         | 3.47         | .217  |
| Mixed or multiple ethnic groups             | 1                                                                                                                                                                                                                                        | 1.0 |                     |       | 62                                                                                                                                                                                                                                          | 0.84 | 0.11         | 6.27         | .866  |
| Asian or Asian British                      | 10                                                                                                                                                                                                                                       | 3.3 |                     |       | 160                                                                                                                                                                                                                                         | 1.58 | 0.61         | 4.09         | .346  |
| Black or Black British                      | 9                                                                                                                                                                                                                                        | 8.9 |                     |       | 66                                                                                                                                                                                                                                          | 2.36 | 0.70         | 7.94         | .166  |
| Other                                       | 1                                                                                                                                                                                                                                        | 1.2 |                     |       | 60                                                                                                                                                                                                                                          | 0.94 | 0.13         | 7.04         | .956  |
|                                             |                                                                                                                                                                                                                                          |     |                     |       | Hosmer & Lemeshow $\chi^2=9.111$ , df=8, p=0.333.<br>Final model $\chi^2=57.132$ , df=24, p<0.001<br>Nagelkerke = .067<br>Cases correctly classified: 98.1%.<br>88 cases excluded due to missing data on one or more independent variables. |      |              |              |       |

\* adjusted for all other variables in the model, AOR, adjusted odds ratio; ref, reference category; 95% CI, 95% confidence interval.

**Table S13 Family and friends – Association between trust in sources of information about COVID-19 vaccine and socio-demographic variables – (a) bivariate results and (b) multivariate logistic regression.**

|                                             | (a) Bivariate associations between socio-demographics and trusting COVID-19 vaccine info from family and friends<br>% Trust completely or a great deal (weighted)<br>$\chi^2$ test for differences by demographics |      |               |       | (b) Logistic regression of trust in COVID-19 vaccine info from family and friends<br>1 = Trust completely or a great deal (1139), 0 = Trust somewhat, very little or not at all (3752)                                                        |      |              |              |       |
|---------------------------------------------|--------------------------------------------------------------------------------------------------------------------------------------------------------------------------------------------------------------------|------|---------------|-------|-----------------------------------------------------------------------------------------------------------------------------------------------------------------------------------------------------------------------------------------------|------|--------------|--------------|-------|
|                                             | n                                                                                                                                                                                                                  | %    | $\chi^2$ (df) | P     | N                                                                                                                                                                                                                                             | AOR* | 95% CI Lower | 95% CI Upper | P     |
| <b>Gender</b>                               |                                                                                                                                                                                                                    |      |               |       |                                                                                                                                                                                                                                               |      |              |              |       |
| Male                                        | 557                                                                                                                                                                                                                | 23.2 | 4.455 (2)     | .108  | 2098                                                                                                                                                                                                                                          | ref  |              |              | .053  |
| Female                                      | 660                                                                                                                                                                                                                | 25.8 |               |       | 2784                                                                                                                                                                                                                                          | 1.17 | 1.01         | 1.34         | .030  |
| Other                                       | 2                                                                                                                                                                                                                  | 28.6 |               |       | 9                                                                                                                                                                                                                                             | 2.39 | 0.58         | 9.85         | .227  |
| <b>Age</b>                                  |                                                                                                                                                                                                                    |      |               |       |                                                                                                                                                                                                                                               |      |              |              |       |
| 18-29                                       | 140                                                                                                                                                                                                                | 17.0 | 109.226 (6)   | <.001 | 459                                                                                                                                                                                                                                           | ref  |              |              | <.001 |
| 30-39 v 18-29                               | 194                                                                                                                                                                                                                | 22.8 |               |       | 759                                                                                                                                                                                                                                           | 1.28 | 0.94         | 1.73         | .112  |
| 40-49 v 18-39                               | 186                                                                                                                                                                                                                | 23.3 |               |       | 834                                                                                                                                                                                                                                           | 1.18 | 0.94         | 1.47         | .157  |
| 50-59 v 18-49                               | 182                                                                                                                                                                                                                | 21.0 |               |       | 896                                                                                                                                                                                                                                           | 0.93 | 0.76         | 1.15         | .504  |
| 60-69 v 18-59                               | 176                                                                                                                                                                                                                | 24.8 |               |       | 1004                                                                                                                                                                                                                                          | 1.11 | 0.92         | 1.33         | .283  |
| 70-79 v 18-69                               | 233                                                                                                                                                                                                                | 35.6 |               |       | 762                                                                                                                                                                                                                                           | 1.85 | 1.54         | 2.23         | <.001 |
| 80+ v 18-79                                 | 90                                                                                                                                                                                                                 | 41.1 |               |       | 177                                                                                                                                                                                                                                           | 2.33 | 1.69         | 3.20         | <.001 |
| <b>Education/Highest qualification</b>      |                                                                                                                                                                                                                    |      |               |       |                                                                                                                                                                                                                                               |      |              |              |       |
| No qualifications                           | 203                                                                                                                                                                                                                | 33.0 | 70.692 (4)    | <.001 | 410                                                                                                                                                                                                                                           | ref  |              |              | <.001 |
| Degree or equivalent and above              | 403                                                                                                                                                                                                                | 19.4 |               |       | 2454                                                                                                                                                                                                                                          | 0.61 | 0.47         | 0.77         | <.001 |
| A levels / Vocational level 3 or equivalent | 271                                                                                                                                                                                                                | 23.9 |               |       | 990                                                                                                                                                                                                                                           | 0.81 | 0.62         | 1.05         | .112  |
| Other qual'ns below A level / Voc level 3   | 254                                                                                                                                                                                                                | 30.4 |               |       | 783                                                                                                                                                                                                                                           | 0.99 | 0.76         | 1.29         | .925  |
| Other qualification                         | 86                                                                                                                                                                                                                 | 28.5 |               |       | 254                                                                                                                                                                                                                                           | 0.96 | 0.68         | 1.36         | .812  |
| <b>Financial Status</b>                     |                                                                                                                                                                                                                    |      |               |       |                                                                                                                                                                                                                                               |      |              |              |       |
| Living comfortably                          | 330                                                                                                                                                                                                                | 25.7 | 6.383 (4)     | .172  | 1533                                                                                                                                                                                                                                          | ref  |              |              | .667  |
| Doing alright                               | 470                                                                                                                                                                                                                | 23.1 |               |       | 1997                                                                                                                                                                                                                                          | 0.94 | 0.79         | 1.10         | .424  |
| Just about getting by                       | 300                                                                                                                                                                                                                | 26.6 |               |       | 958                                                                                                                                                                                                                                           | 1.00 | 0.81         | 1.22         | .976  |
| Finding it quite difficult                  | 81                                                                                                                                                                                                                 | 24.0 |               |       | 266                                                                                                                                                                                                                                           | 1.03 | 0.75         | 1.42         | .856  |
| Finding it very difficult                   | 38                                                                                                                                                                                                                 | 21.8 |               |       | 137                                                                                                                                                                                                                                           | 0.75 | 0.47         | 1.18         | .212  |
| <b>Country</b>                              |                                                                                                                                                                                                                    |      |               |       |                                                                                                                                                                                                                                               |      |              |              |       |
| England                                     | 1051                                                                                                                                                                                                               | 24.6 | 13.592 (2)    | .001  | 4299                                                                                                                                                                                                                                          | ref  |              |              | .012  |
| Scotland                                    | 89                                                                                                                                                                                                                 | 20.1 |               |       | 384                                                                                                                                                                                                                                           | 1.00 | 0.77         | 1.29         | .976  |
| Wales                                       | 78                                                                                                                                                                                                                 | 32.9 |               |       | 208                                                                                                                                                                                                                                           | 1.59 | 1.17         | 2.17         | .003  |
| <b>Urban/rural</b>                          |                                                                                                                                                                                                                    |      |               |       |                                                                                                                                                                                                                                               |      |              |              |       |
| Urban                                       | 979                                                                                                                                                                                                                | 24.5 | .029 (1)      | .866  | 3726                                                                                                                                                                                                                                          |      |              |              |       |
| Rural                                       | 239                                                                                                                                                                                                                | 24.8 |               |       | 1165                                                                                                                                                                                                                                          | 0.91 | 0.77         | 1.07         | .237  |
| <b>Ethnicity</b>                            |                                                                                                                                                                                                                    |      |               |       |                                                                                                                                                                                                                                               |      |              |              |       |
| White British                               | 1005                                                                                                                                                                                                               | 25.1 | 36.523 (5)    | <.001 | 4226                                                                                                                                                                                                                                          | ref  |              |              | .029  |
| Any other white background                  | 50                                                                                                                                                                                                                 | 15.0 |               |       | 317                                                                                                                                                                                                                                           | 0.79 | 0.58         | 1.07         | .128  |
| Mixed or multiple ethnic groups             | 15                                                                                                                                                                                                                 | 15.5 |               |       | 62                                                                                                                                                                                                                                            | 0.76 | 0.38         | 1.51         | .428  |
| Asian or Asian British                      | 100                                                                                                                                                                                                                | 32.8 |               |       | 160                                                                                                                                                                                                                                           | 1.52 | 1.06         | 2.18         | .024  |
| Black or Black British                      | 27                                                                                                                                                                                                                 | 26.7 |               |       | 67                                                                                                                                                                                                                                            | 1.39 | 0.79         | 2.46         | .250  |
| Other                                       | 12                                                                                                                                                                                                                 | 15.2 |               |       | 59                                                                                                                                                                                                                                            | 0.53 | 0.24         | 1.18         | .122  |
|                                             |                                                                                                                                                                                                                    |      |               |       | Hosmer & Lemeshow $\chi^2= 6.067$ , df=8, p=0.640.<br>Final model $\chi^2=153.732$ , df=24, p<0.001<br>Nagelkerke = .047<br>Cases correctly classified: 76.7%.<br>87 cases excluded due to missing data on one or more independent variables. |      |              |              |       |

\* adjusted for all other variables in the model, AOR, adjusted odds ratio; ref, reference category; 95% CI, 95% confidence interval.

**Table S14 Faith or community leaders – Association between trust in sources of information about COVID-19 vaccine and socio-demographic variables – (a) bivariate results and (b) multivariate logistic regression.**

|                                             | (a) Bivariate associations between socio-demographics and trusting COVID-19 vaccine info from faith and community leaders<br>% Trust completely or a great deal (weighted)<br>$\chi^2$ test for differences by demographics |      |               |       | (b) Logistic regression of trust in COVID-19 vaccine info from faith and community leaders<br>1 = Trust completely or a great deal (161), 0 = Trust somewhat, very little or not at all (4724)                                                |       |              |              |       |
|---------------------------------------------|-----------------------------------------------------------------------------------------------------------------------------------------------------------------------------------------------------------------------------|------|---------------|-------|-----------------------------------------------------------------------------------------------------------------------------------------------------------------------------------------------------------------------------------------------|-------|--------------|--------------|-------|
|                                             | n                                                                                                                                                                                                                           | %    | $\chi^2$ (df) | P     | N                                                                                                                                                                                                                                             | AOR*  | 95% CI Lower | 95% CI Upper | P     |
| <b>Gender</b>                               |                                                                                                                                                                                                                             |      |               |       |                                                                                                                                                                                                                                               |       |              |              |       |
| Male                                        | 118                                                                                                                                                                                                                         | 4.9  | 17.452 (2)    | <.001 | 2095                                                                                                                                                                                                                                          | ref   |              |              | .006  |
| Female                                      | 135                                                                                                                                                                                                                         | 5.3  |               |       | 2781                                                                                                                                                                                                                                          | 1.19  | 0.86         | 1.66         | .294  |
| Other                                       | 3                                                                                                                                                                                                                           | 37.5 |               |       | 9                                                                                                                                                                                                                                             | 14.06 | 2.67         | 73.92        | .002  |
| <b>Age</b>                                  |                                                                                                                                                                                                                             |      |               |       |                                                                                                                                                                                                                                               |       |              |              |       |
| 18-29                                       | 47                                                                                                                                                                                                                          | 5.7  | 20.879 (6)    | .002  | 459                                                                                                                                                                                                                                           | ref   |              |              | .041  |
| 30-39 v 18-29                               | 46                                                                                                                                                                                                                          | 5.4  |               |       | 758                                                                                                                                                                                                                                           | 0.95  | 0.47         | 1.93         | .880  |
| 40-49 v 18-39                               | 31                                                                                                                                                                                                                          | 3.9  |               |       | 834                                                                                                                                                                                                                                           | 1.11  | 0.65         | 1.89         | .710  |
| 50-59 v 18-49                               | 46                                                                                                                                                                                                                          | 5.3  |               |       | 895                                                                                                                                                                                                                                           | 1.70  | 1.09         | 2.65         | .020  |
| 60-69 v 18-59                               | 20                                                                                                                                                                                                                          | 2.8  |               |       | 1003                                                                                                                                                                                                                                          | 0.98  | 0.61         | 1.58         | .933  |
| 70-79 v 18-69                               | 42                                                                                                                                                                                                                          | 6.4  |               |       | 760                                                                                                                                                                                                                                           | 1.62  | 1.03         | 2.55         | .038  |
| 80+ v 18-79                                 | 20                                                                                                                                                                                                                          | 9.2  |               |       | 176                                                                                                                                                                                                                                           | 2.28  | 1.15         | 4.56         | .019  |
| <b>Education/Highest qualification</b>      |                                                                                                                                                                                                                             |      |               |       |                                                                                                                                                                                                                                               |       |              |              |       |
| No qualifications                           | 57                                                                                                                                                                                                                          | 9.3  | 37.137 (4)    | <.001 | 407                                                                                                                                                                                                                                           | ref   |              |              | .011  |
| Degree or equivalent and above              | 76                                                                                                                                                                                                                          | 3.7  |               |       | 2451                                                                                                                                                                                                                                          | 0.42  | 0.25         | 0.71         | <.001 |
| A levels / Vocational level 3 or equivalent | 51                                                                                                                                                                                                                          | 4.5  |               |       | 990                                                                                                                                                                                                                                           | 0.57  | 0.33         | 0.99         | .048  |
| Other qual'ns below A level / Voc level 3   | 58                                                                                                                                                                                                                          | 6.9  |               |       | 782                                                                                                                                                                                                                                           | 0.75  | 0.44         | 1.28         | .290  |
| Other qualification                         | 15                                                                                                                                                                                                                          | 4.9  |               |       | 255                                                                                                                                                                                                                                           | 0.50  | 0.22         | 1.14         | .098  |
| <b>Financial Status</b>                     |                                                                                                                                                                                                                             |      |               |       |                                                                                                                                                                                                                                               |       |              |              |       |
| Living comfortably                          | 59                                                                                                                                                                                                                          | 4.6  | 39.487 (4)    | <.001 | 1530                                                                                                                                                                                                                                          | ref   |              |              | .042  |
| Doing alright                               | 71                                                                                                                                                                                                                          | 3.5  |               |       | 1997                                                                                                                                                                                                                                          | 0.91  | 0.59         | 1.39         | .663  |
| Just about getting by                       | 84                                                                                                                                                                                                                          | 7.5  |               |       | 955                                                                                                                                                                                                                                           | 1.46  | 0.92         | 2.33         | .110  |
| Finding it quite difficult                  | 20                                                                                                                                                                                                                          | 5.9  |               |       | 266                                                                                                                                                                                                                                           | 2.05  | 1.09         | 3.84         | .025  |
| Finding it very difficult                   | 20                                                                                                                                                                                                                          | 11.5 |               |       | 137                                                                                                                                                                                                                                           | 1.44  | 0.60         | 3.44         | .417  |
| <b>Country</b>                              |                                                                                                                                                                                                                             |      |               |       |                                                                                                                                                                                                                                               |       |              |              |       |
| England                                     | 239                                                                                                                                                                                                                         | 5.6  | 12.569 (2)    | .002  | 4294                                                                                                                                                                                                                                          | ref   |              |              | .592  |
| Scotland                                    | 11                                                                                                                                                                                                                          | 2.5  |               |       | 383                                                                                                                                                                                                                                           | 0.69  | 0.33         | 1.43         | .316  |
| Wales                                       | 5                                                                                                                                                                                                                           | 2.1  |               |       | 208                                                                                                                                                                                                                                           | 1.07  | 0.46         | 2.48         | .877  |
| <b>Urban/rural</b>                          |                                                                                                                                                                                                                             |      |               |       |                                                                                                                                                                                                                                               |       |              |              |       |
| Urban                                       | 229                                                                                                                                                                                                                         | 5.7  | 13.640 (1)    | <.001 | 3722                                                                                                                                                                                                                                          |       |              |              |       |
| Rural                                       | 27                                                                                                                                                                                                                          | 2.8  |               |       | 1163                                                                                                                                                                                                                                          | 0.66  | 0.42         | 1.03         | .068  |
| <b>Ethnicity</b>                            |                                                                                                                                                                                                                             |      |               |       |                                                                                                                                                                                                                                               |       |              |              |       |
| White British                               | 163                                                                                                                                                                                                                         | 4.1  | 152.072(5)    | <.001 | 4219                                                                                                                                                                                                                                          | ref   |              |              | <.001 |
| Any other white background                  | 12                                                                                                                                                                                                                          | 3.6  |               |       | 318                                                                                                                                                                                                                                           | 1.22  | 0.60         | 2.46         | .583  |
| Mixed or multiple ethnic groups             | 3                                                                                                                                                                                                                           | 3.1  |               |       | 62                                                                                                                                                                                                                                            | 2.59  | 0.90         | 7.42         | .077  |
| Asian or Asian British                      | 59                                                                                                                                                                                                                          | 19.6 |               |       | 159                                                                                                                                                                                                                                           | 4.82  | 2.76         | 8.42         | <.001 |
| Black or Black British                      | 12                                                                                                                                                                                                                          | 11.9 |               |       | 67                                                                                                                                                                                                                                            | 4.52  | 2.04         | 9.99         | <.001 |
| Other                                       | 2                                                                                                                                                                                                                           | 2.5  |               |       | 60                                                                                                                                                                                                                                            | 1.37  | 0.32         | 5.77         | .669  |
|                                             |                                                                                                                                                                                                                             |      |               |       | Hosmer & Lemeshow $\chi^2$ = 11.202, df=8, p=0.191.<br>Final model $\chi^2$ =87.282, df=24, p<0.001<br>Nagelkerke = .070<br>Cases correctly classified: 96.7%.<br>93 cases excluded due to missing data on one or more independent variables. |       |              |              |       |

\* adjusted for all other variables in the model, AOR, adjusted odds ratio; ref, reference category; 95% CI, 95% confidence interval.

## Supplementary material to ‘A national survey of attitudes towards and intentions to vaccinate against COVID-19: implications for communications’.

### Checklist: STROBE Statement – items that should be included in reports of cross-sectional studies

|                           | Item No | Recommendation                                                                                                                                                                                               | Location where item is reported                                                                                                                                                                                 |
|---------------------------|---------|--------------------------------------------------------------------------------------------------------------------------------------------------------------------------------------------------------------|-----------------------------------------------------------------------------------------------------------------------------------------------------------------------------------------------------------------|
| <b>Title and abstract</b> | 1       | (a) Indicate the study’s design with a commonly used term in the title or the abstract                                                                                                                       | Title and abstract                                                                                                                                                                                              |
|                           |         | (b) Provide in the abstract an informative and balanced summary of what was done and what was found                                                                                                          | Abstract                                                                                                                                                                                                        |
| <b>Introduction</b>       |         |                                                                                                                                                                                                              |                                                                                                                                                                                                                 |
| Background/rationale      | 2       | Explain the scientific background and rationale for the investigation being reported                                                                                                                         | Introduction                                                                                                                                                                                                    |
| Objectives                | 3       | State specific objectives, including any prespecified hypotheses                                                                                                                                             | Introduction (third paragraph). As this was the first survey of this type which addressed actual, rather than hypothetical, vaccines; we conducted an exploratory investigation rather than testing hypotheses. |
| <b>Methods</b>            |         |                                                                                                                                                                                                              |                                                                                                                                                                                                                 |
| Study design              | 4       | Present key elements of study design early in the paper                                                                                                                                                      | Methods (opening paragraph)                                                                                                                                                                                     |
| Setting                   | 5       | Describe the setting, locations, and relevant dates, including periods of recruitment, exposure, follow-up, and data collection                                                                              | Methods: Sample and data collection                                                                                                                                                                             |
| Participants              | 6       | (a) Give the eligibility criteria, and the sources and methods of selection of participants                                                                                                                  | Methods: Sample and data collection                                                                                                                                                                             |
| Variables                 | 7       | Clearly define all outcomes, exposures, predictors, potential confounders, and effect modifiers. Give diagnostic criteria, if applicable                                                                     | Methods: Measures                                                                                                                                                                                               |
| Data sources/measurement  | 8*      | For each variable of interest, give sources of data and details of methods of assessment (measurement). Describe comparability of assessment methods if there is more than one group                         | Methods: Measures                                                                                                                                                                                               |
| Bias                      | 9       | Describe any efforts to address potential sources of bias                                                                                                                                                    | Methods: Sample and data collection (Survey used a probability sample; participants accessed online or by telephone, sent reminders—addressing response bias)                                                   |
| Study size                | 10      | Explain how the study size was arrived at                                                                                                                                                                    | Methods: Sample and data collection                                                                                                                                                                             |
| Quantitative variables    | 11      | Explain how quantitative variables were handled in the analyses. If applicable, describe which groupings were chosen and why                                                                                 | Methods: Data analysis                                                                                                                                                                                          |
| Statistical methods       | 12      | (a) Describe all statistical methods, including those used to control for confounding                                                                                                                        | Methods: Data analysis                                                                                                                                                                                          |
|                           |         | (b) Describe any methods used to examine subgroups and interactions                                                                                                                                          | Methods: Data analysis                                                                                                                                                                                          |
|                           |         | (c) Explain how missing data were addressed                                                                                                                                                                  | Methods: Data analysis                                                                                                                                                                                          |
|                           |         | (d) If applicable, describe analytical methods taking account of sampling strategy                                                                                                                           | Methods: Data analysis                                                                                                                                                                                          |
|                           |         | (e) Describe any sensitivity analyses                                                                                                                                                                        | Not applicable                                                                                                                                                                                                  |
| <b>Results</b>            |         |                                                                                                                                                                                                              |                                                                                                                                                                                                                 |
| Participants              | 13*     | (a) Report numbers of individuals at each stage of study—eg numbers potentially eligible, examined for eligibility, confirmed eligible, included in the study, completing follow-up, and analysed            | Table S1                                                                                                                                                                                                        |
|                           |         | (b) Give reasons for non-participation at each stage                                                                                                                                                         | Table S1                                                                                                                                                                                                        |
|                           |         | (c) Consider use of a flow diagram                                                                                                                                                                           | Not required                                                                                                                                                                                                    |
| Descriptive data          | 14*     | (a) Give characteristics of study participants (eg demographic, clinical, social) and information on exposures and potential confounders                                                                     | Results: Sample characteristics; and Table 1                                                                                                                                                                    |
|                           |         | (b) Indicate number of participants with missing data for each variable of interest                                                                                                                          | Tables 2-4 and S2-S14                                                                                                                                                                                           |
| Outcome data              | 15*     | Report numbers of outcome events or summary measures                                                                                                                                                         | Tables 2-4 and S2-S14                                                                                                                                                                                           |
| Main results              | 16      | (a) Give unadjusted estimates and, if applicable, confounder-adjusted estimates and their precision (eg, 95% confidence interval). Make clear which confounders were adjusted for and why they were included | Results; Tables 3-4 and S2-S14                                                                                                                                                                                  |
|                           |         | (b) Report category boundaries when continuous variables were categorized                                                                                                                                    | Not applicable (all variables were categorical)                                                                                                                                                                 |
|                           |         | (c) If relevant, consider translating estimates of relative risk into absolute risk for a meaningful time period                                                                                             | Not applicable                                                                                                                                                                                                  |



|                          | <b>Item No</b> | <b>Recommendation</b>                                                                                                                                                      | <b>Location where item is reported</b>                                               |
|--------------------------|----------------|----------------------------------------------------------------------------------------------------------------------------------------------------------------------------|--------------------------------------------------------------------------------------|
| Other analyses           | 17             | Report other analyses done—eg analyses of subgroups and interactions, and sensitivity analyses                                                                             | Tables S2-S14 (subgroup analyses of the 13 COVID-19 vaccine information sources)     |
| <b>Discussion</b>        |                |                                                                                                                                                                            |                                                                                      |
| Key results              | 18             | Summarise key results with reference to study objectives                                                                                                                   | Discussion: Principal findings                                                       |
| Limitations              | 19             | Discuss limitations of the study, taking into account sources of potential bias or imprecision. Discuss both direction and magnitude of any potential bias                 | Discussion: Strengths and limitations                                                |
| Interpretation           | 20             | Give a cautious overall interpretation of results considering objectives, limitations, multiplicity of analyses, results from similar studies, and other relevant evidence | Discussion: Comparison with other studies; and Discussion: Strengths and limitations |
| Generalisability         | 21             | Discuss the generalisability (external validity) of the study results                                                                                                      | Discussion: Strengths and limitations                                                |
| <b>Other information</b> |                |                                                                                                                                                                            |                                                                                      |
| Funding                  | 22             | Give the source of funding and the role of the funders for the present study and, if applicable, for the original study on which the present article is based              | Role of the funding source                                                           |

\*Give information separately for exposed and unexposed groups.

# BMJ Open

## A national survey of attitudes towards and intentions to vaccinate against COVID-19: implications for communications

|                                 |                                                                                                                                                                                                                                                                                                                                                                                                                                                                                                                                                                                                                                                                                                                                                                                                                                                                              |
|---------------------------------|------------------------------------------------------------------------------------------------------------------------------------------------------------------------------------------------------------------------------------------------------------------------------------------------------------------------------------------------------------------------------------------------------------------------------------------------------------------------------------------------------------------------------------------------------------------------------------------------------------------------------------------------------------------------------------------------------------------------------------------------------------------------------------------------------------------------------------------------------------------------------|
| Journal:                        | <i>BMJ Open</i>                                                                                                                                                                                                                                                                                                                                                                                                                                                                                                                                                                                                                                                                                                                                                                                                                                                              |
| Manuscript ID                   | bmjopen-2021-055085.R1                                                                                                                                                                                                                                                                                                                                                                                                                                                                                                                                                                                                                                                                                                                                                                                                                                                       |
| Article Type:                   | Original research                                                                                                                                                                                                                                                                                                                                                                                                                                                                                                                                                                                                                                                                                                                                                                                                                                                            |
| Date Submitted by the Author:   | 14-Sep-2021                                                                                                                                                                                                                                                                                                                                                                                                                                                                                                                                                                                                                                                                                                                                                                                                                                                                  |
| Complete List of Authors:       | Stead, Martine; University of Stirling Institute for Social Marketing and Health<br>Jessop, Curtis; NatCen Social Research<br>Angus, Kathryn; University of Stirling Institute for Social Marketing and Health<br>Bedford, Helen; UCL Great Ormond Street Institute of Child Health Population Policy and Practice<br>Ussher, Michael; University of Stirling Institute for Social Marketing and Health; St George's University of London Population Health Research Institute<br>Ford, Allison; University of Stirling Institute for Social Marketing and Health<br>Eadie, Douglas; University of Stirling Institute for Social Marketing and Health<br>MacGregor, Andy; NatCen Social Research<br>Hunt, Kate; University of Stirling Institute for Social Marketing and Health<br>MacKintosh, Anne Marie; University of Stirling Institute for Social Marketing and Health |
| <b>Primary Subject Heading</b>: | Public health                                                                                                                                                                                                                                                                                                                                                                                                                                                                                                                                                                                                                                                                                                                                                                                                                                                                |
| Secondary Subject Heading:      | Immunology (including allergy)                                                                                                                                                                                                                                                                                                                                                                                                                                                                                                                                                                                                                                                                                                                                                                                                                                               |
| Keywords:                       | COVID-19, IMMUNOLOGY, Epidemiology < INFECTIOUS DISEASES, Public health < INFECTIOUS DISEASES, PUBLIC HEALTH                                                                                                                                                                                                                                                                                                                                                                                                                                                                                                                                                                                                                                                                                                                                                                 |
|                                 |                                                                                                                                                                                                                                                                                                                                                                                                                                                                                                                                                                                                                                                                                                                                                                                                                                                                              |

SCHOLARONE™  
Manuscripts



I, the Submitting Author has the right to grant and does grant on behalf of all authors of the Work (as defined in the below author licence), an exclusive licence and/or a non-exclusive licence for contributions from authors who are: i) UK Crown employees; ii) where BMJ has agreed a CC-BY licence shall apply, and/or iii) in accordance with the terms applicable for US Federal Government officers or employees acting as part of their official duties; on a worldwide, perpetual, irrevocable, royalty-free basis to BMJ Publishing Group Ltd ("BMJ") its licensees and where the relevant Journal is co-owned by BMJ to the co-owners of the Journal, to publish the Work in this journal and any other BMJ products and to exploit all rights, as set out in our [licence](#).

The Submitting Author accepts and understands that any supply made under these terms is made by BMJ to the Submitting Author unless you are acting as an employee on behalf of your employer or a postgraduate student of an affiliated institution which is paying any applicable article publishing charge ("APC") for Open Access articles. Where the Submitting Author wishes to make the Work available on an Open Access basis (and intends to pay the relevant APC), the terms of reuse of such Open Access shall be governed by a Creative Commons licence – details of these licences and which [Creative Commons](#) licence will apply to this Work are set out in our licence referred to above.

Other than as permitted in any relevant BMJ Author's Self Archiving Policies, I confirm this Work has not been accepted for publication elsewhere, is not being considered for publication elsewhere and does not duplicate material already published. I confirm all authors consent to publication of this Work and authorise the granting of this licence.

# A national survey of attitudes towards and intentions to vaccinate against COVID-19: implications for communications

Martine Stead, Deputy Director<sup>1\*</sup>

Curtis Jessop, Research Director for Longitudinal Surveys<sup>2</sup>

Kathryn Angus, Research Officer<sup>1</sup>

Helen Bedford, Professor of Children's Health<sup>3</sup>

Michael Ussher, Professor of Behavioural Medicine<sup>1,4</sup>

Allison Ford, Research Fellow<sup>1</sup>

Douglas Eadie, Research Fellow<sup>1</sup>

Andy MacGregor, Director of Policy Research<sup>2</sup>

Kate Hunt, Professor of Behavioural Sciences and Health<sup>1</sup>

Anne Marie MacKintosh, Senior Researcher<sup>1</sup>

<sup>1</sup>Institute for Social Marketing and Health, University of Stirling, Stirling, UK

<sup>2</sup>NatCen The National Centre for Social Research, London, UK

<sup>3</sup>Great Ormond Street Institute of Child Health, University College London, London, UK

<sup>4</sup>Population Health Research Institute, St George's University of London, London, UK

\*Corresponding author: [martine.stead@stir.ac.uk](mailto:martine.stead@stir.ac.uk), +44(0)1786 467390, Institute for Social Marketing and Health, University of Stirling, Stirling, FK9 4LA, UK

## Abstract

### Objectives

To examine public views on COVID-19 vaccination and consider the implications for communications and targeted support.

### Design

Cross-sectional study.

### Setting

Online and telephone nationally representative survey in Great Britain, January to February 2021.

### Participants

4,978 adults. Survey response rate was 84%, among the 5,931 panellists invited.

### Main Outcome Measures

Sociodemographic characteristics (age, gender, ethnicity, education, financial status), COVID-19 status, vaccine acceptance, trust in COVID-19 vaccination information sources, perceptions of vaccination priority groups, and perceptions of importance of second dose.

### Results

COVID-19 vaccine acceptance (83%) was associated with increasing age, higher level of education and having been invited for vaccination. Acceptance decreased with unconfirmed past COVID-19, greater financial hardship, and non-White British ethnicity; Black/Black British participants had lowest acceptance. Overall, healthcare and scientific sources of information were most trusted. Compared with White British participants, other ethnicities had lower trust in healthcare and scientific sources. Those with lower educational attainment or financial hardship had lower trust in healthcare and scientific sources. Those with no qualifications had higher trust in media and family/friends. While trust was low overall in community or faith leaders it was higher among those with Asian/Asian British and Black/Black British ethnicity compared with White British participants. Views of vaccine prioritisation were mostly consistent with UK official policy but there was support for prioritising additional groups. There was high support for having the second vaccine dose.

### Conclusions

Targeted engagement is needed to address COVID-19 vaccine hesitancy in non-White British ethnic groups, in younger adults, and among those with lower education, greater financial hardship and unconfirmed past infection. Healthcare professionals and scientific advisors should play a central role in communications and tailored messaging is needed for hesitant groups. Careful communication around vaccination prioritisation continues to be required.

## STRENGTHS AND LIMITATIONS OF THIS STUDY

- The survey was conducted at the start of vaccine rollout giving timely insight into COVID-19 vaccine acceptance/hesitancy and trusted information sources when individuals' decision-making was real rather than hypothetical.
- Results come from a large probability-based sample, representative of adults in Great Britain, which was sufficiently large to examine ethnicity in detail.
- The survey did not include those who are institutionalised (e.g., prisoners), notably difficult to reach populations (e.g., homeless) or those not speaking English (therefore, our ethnic minority sample may underrepresent certain views).
- The survey benefited from a rigorous design, with questionnaire development informed by cognitive interviews conducted with a broad range of individuals.
- A cross-sectional survey cannot infer causality; although variables likely to be important in vaccine acceptance were included, the results are exploratory.

## Introduction

Widespread vaccination is likely to be one of the most effective ways of controlling the COVID-19 pandemic, and is central to the UK government's recovery strategy. The UK vaccine programme began in December 2020, prioritising older adults in care homes and their carers, those aged over 80, and frontline health and social-care workers.<sup>1</sup> Administration of first doses of vaccination to the adult population, by decade of age, is to be completed by July 2021. Uncertainty or unwillingness to accept vaccination – 'vaccine hesitancy'<sup>2</sup> – threatens comprehensive vaccination.<sup>3,4</sup> Before the introduction of a COVID-19 vaccine, UK surveys reported that 64% to 82% of adults were willing to be vaccinated.<sup>5-12</sup> Most of these studies used non-probability samples, introducing selection bias and limiting generalisability. Increased vaccine confidence has been reported since vaccination commenced;<sup>13</sup> possibly due to increased COVID-19 cases and deaths, a further UK lockdown in early 2021, and, increasingly, vaccination becoming the social norm. It is important to examine vaccine acceptance when people are making *active*, rather than *hypothetical*, decisions about vaccination. This also provides insight into potential acceptance of repeat COVID-19 vaccination and boosters.<sup>14</sup>

UK uptake has been high (94% of adults surveyed in April reported uptake or intention to accept vaccination),<sup>13</sup> but there remain concerns about uptake in subpopulations, such as younger adults and some ethnic minorities,<sup>15</sup> giving rise to initiatives such as social media campaigns featuring non-White celebrities.<sup>16</sup> Robust, timely data are needed to identify the characteristics of groups with lower acceptance and the information sources they trust, to inform targeted interventions. It is also important to assess whether attitudes towards COVID-19 vaccination have been affected by specific events and media coverage. Two issues in the UK merit particular attention. First, the government followed recommendations to offer the vaccine to priority groups.<sup>1</sup> If this approach is continued, it is important to examine its acceptability and any implications for communications. Secondly, the government decided, on 30<sup>th</sup> December 2020, to deviate from recommended protocols for the Pfizer-BioNTech vaccine by extending the interval between doses to up to 12 weeks;<sup>1</sup> this precipitated concerns that it may lead to reduced willingness to be vaccinated or to have a second dose.<sup>17</sup>

We conducted a survey in early 2021, using probability sampling, to examine public views on COVID-19 vaccination and consider the implications for communications. During this period most people aged over 80 had been invited to have a vaccine and invitations were being extended to those aged over 70, with other age groups advised they would be invited in the coming months.

## Methods

1  
2  
3 We administered a cross-sectional survey with adults (aged 18+) in Great Britain (GB) in January  
4 and February 2021. This paper follows the STROBE Statement for reporting cross-sectional  
5 studies.<sup>18</sup>  
6  
7

### 8 **Questionnaire development and testing**

9 The questionnaire was informed by a review of studies on public attitudes towards and experiences  
10 of vaccines and COVID-19. Existing measures were adapted<sup>5,19,20</sup> and new questions developed.  
11 The questionnaire was cognitively tested with members of the public to ensure understandability.<sup>21</sup>  
12 Interviews were conducted with 20 individuals recruited by an external fieldwork agency. A  
13 purposive sampling approach was employed, with quotas used to ensure people with a mix of  
14 genders, ages, parental status, likelihood of accepting a COVID-19 vaccination, and experiences of  
15 shielding were recruited. The questionnaire was subsequently revised based on these interviews.  
16 Final revisions reflected changes in the UK's vaccine rollout. The questionnaire covered: vaccine  
17 acceptance, trust in vaccine information sources, perception of priority groups, COVID-19 status,  
18 and perceived importance of a second dose. The questionnaire is provided in Supplementary  
19 Material, Methods S1.  
20  
21  
22  
23  
24  
25  
26

### 27 **Sample and data collection**

28 The target population for the study was adults (18+) living in Great Britain. The survey was  
29 administered to the probability-based NatCen Panel,<sup>22</sup> recruited from the 2018, 2019, and 2020  
30 waves of the British Social Attitudes survey (BSA), with participants randomly selected from  
31 England, Wales and Scotland. All BSA respondents who agreed to join the Panel, had not  
32 requested to leave or become inactive were invited to take part, maintaining the random probability  
33 design. Data were collected through online and telephone interviews (conducted 14<sup>th</sup> January to 7<sup>th</sup>  
34 February 2021). Panellists were sent reminders and offered a small financial sum (£5 - £20  
35 depending on interview duration and whether participant had characteristics which are typically  
36 under-represented in survey samples) in recognition of their contribution. Participants who did not  
37 initially take part online, and for whom a telephone number was available, were followed up by a  
38 telephone interviewer and encouraged to take part online or given the opportunity to take part on  
39 the telephone. Among 5,931 panellists invited, the survey response rate was 84%, with 4,978  
40 completing it (4,776 online, 202 by telephone). Supplementary Material, Table S1 details overall  
41 response rate, accounting for non-response at the panel recruitment stage and panel attrition. Data  
42 were weighted for non-response and to be representative of the GB adult population (see  
43 Supplementary Material, Methods S2).  
44  
45  
46  
47  
48  
49  
50  
51  
52  
53

### 54 **Measures**

#### 55 *Sociodemographic and other characteristics*

56 Data on age, gender, ethnicity, education, country, urban/rural status, and financial status were  
57 obtained from existing information on NatCen panellists. Full details of sub-groups of each variable  
58 are provided in Tables 1 and 2. Age was categorised into bands from 18-29 years then ten-year  
59  
60



bands up to 80+. Self-assigned ethnicity was recorded in six categories, and education in five categories according to highest qualification. As indices of multiple deprivation were not available, self-reported financial status was used. COVID-19 status was derived from two items: 1) *“Have you officially been diagnosed with the coronavirus (COVID-19)?”* (yes/no/don't know); those answering other than 'yes' were asked: 2) *“Do you think you have ever had the coronavirus (COVID-19)?”* (yes-definitely/yes-probably/no-probably not/no-definitely not/don't know).

### *Vaccine measures*

Vaccine acceptance was derived from five items: 1) *“Have you been offered a vaccine for COVID-19?”* (yes/no). Those answering 'yes' were asked: 2) *“And have you had that vaccine?”* (yes/no). Participants who had been offered but not yet had the vaccine were then asked: 3) *“And do you intend to have that vaccine?”* (yes/no/not sure). Participants who had not yet been offered the vaccine were asked: 4) *“Would you accept the vaccine for yourself if it is offered to you?”* (yes/no/not sure). Those answering 'not sure' were asked: 5) *“If you had to choose, if a COVID-19 vaccine became publicly available and you were offered it, would you accept the vaccine for yourself?”* (yes/no/I'm really not sure). Participants were classed as: 'Accepted/accepting' if they answered 'yes' to any of items 2, 3, 4, or 5; 'Uncertain' if they answered 'not sure' to item 3 or 'I'm really not sure' to item 5; and 'Refused/refusing' if they answered 'no' to items 3, 4, or 5.

Trust in information sources was assessed for 13 sources: *“To what extent, if at all, would you trust information about a COVID-19 vaccine from each of the following sources?”* (see Table 3): completely (1); a great deal (2); somewhat (3); very little (4); not at all (5).

Perceptions of vaccine priority groups were assessed across 11 groups (see Table 4): *“Below are some groups that some people say should be the first to be offered a COVID-19 vaccine. For each one, how high a priority do you think it is that they get a COVID-19 vaccine, or do you not think they should be offered the vaccine at all?”*: 1 'One of the first', 5 'One of the last', with an additional option *“They should not be offered a vaccine”*.

Perceived importance of receiving the second dose of the vaccine was assessed with: *“How important, if at all, do you think it is for people to get the second injection of the COVID-19 vaccine?”*: very important (1); fairly important (2); not very important (3); not at all important (4).

### **Data analysis**

Descriptive data, including bivariate analyses, were weighted to be representative of British adult population. Initial bivariate analyses, using chi-square tests, examined correlates of vaccine acceptance and trust in sources of information about COVID-19 vaccination. Multivariate logistic regression was conducted to examine differences in vaccine acceptance controlling for socio-demographic variables, vaccine offer, and COVID-19 status. The dependent variable dichotomised those classed as *accepted/intending to accept vs uncertain/refused/intend to refuse*. Age was entered as a categorical variable and the 'difference' contrast within SPSS logistic regression was used to test influence of each increasing age group, relative to younger ages (e.g., 30-39 vs 18-29;

1  
2  
3 80+ vs 18-79) (see Table 2). Sociodemographic variation in trust in information sources was  
4 examined using multivariate logistic regressions. For each information source, the dependent  
5 variable dichotomised the 5-point scale into trusting *completely or a great deal* vs *somewhat/very*  
6 *little/not at all*. Cases were excluded from the logistic regressions if they had missing data on the  
7 dependent or any independent variables. All logistic regressions were conducted on unweighted  
8 data as sociodemographic variables were included as control variables. For each information  
9 source, logistic regression analysis examined likelihood of trust (completely/a great deal v  
10 somewhat/very little/not at all) by sociodemographic characteristics (Supplementary Material, Tables  
11 S2-S14). Given the large sample size in this study, the threshold for statistical significance was set  
12 at  $p < 0.01$ . Data were analysed using SPSS v27.

### 13 **Public and patient involvement**

14 The questionnaire was cognitively tested by members of the public to ensure understandability (see  
15 'Questionnaire development and testing' above).

## 16 **Results**

### 17 **Sample characteristics**

18 The weighted sample comprised adults aged 18 and over (see Table 1). Over half (52%) were  
19 female and 81% were White British. Around two-thirds reported 'living comfortably'/'doing alright',  
20 while one in ten rated their financial status as 'quite' or 'very difficult'. Just over two-fifths were  
21 educated to degree level or above, while for almost a quarter their highest qualification was A level  
22 or equivalent. A minority (12%) had no qualifications. A minority indicated having been diagnosed  
23 with COVID-19 (6%); nearly two-thirds thought they probably or definitely had not had COVID-19;  
24 11% were unsure.

### 25 **Vaccine offer and acceptance**

26 At the time of the survey, 14% (n=716) had been offered the vaccine. Of these, 92% (n=658) had  
27 accepted or intended to, 4% (n=29) were uncertain, and 4% (n=29) had refused or intended to  
28 refuse.

29 Among those not yet offered the vaccine, 82% (n=3479) intended to accept, while 11% (n=471)  
30 were uncertain and 7% (n=311) indicated they would refuse. Overall, the acceptance level was 83%  
31 (n=4137), with 10% (n=502) uncertain and 7% (n=340) refusing.

32 Multivariate logistic regression, with vaccine acceptance as the outcome variable  
33 (accepted/accepting v refused/refusing/uncertain), indicated likelihood of acceptance increased with  
34 age (Table 2). For example, those aged 40-49 were more likely than 18-39-year-olds to indicate  
35 acceptance (AOR=1.43, 95%CI (1.12, 1.83,  $p=0.004$ ) as were 70-79-year-olds compared with 18-  
36 69-year-olds (AOR=3.31, 95%CI (2.22, 4.95),  $p < 0.001$ ). Acceptance was also positively associated  
37 with education. Those with at least a degree were three times as likely to indicate acceptance  
38  
39  
40  
41  
42  
43  
44  
45  
46  
47  
48  
49  
50  
51  
52  
53  
54  
55  
56  
57  
58  
59  
60

(AOR=3.03, 95%CI (2.17, 4.23),  $p<0.001$ ) and those educated to A level or equivalent nearly twice as likely (AOR=1.80, 95%CI (1.27, 2.55),  $p<0.001$ ), compared with people without qualifications. Lower acceptance was also associated with financial hardship and ethnicity. For example, compared with those 'living comfortably', people 'finding it very difficult' were much less likely to accept the vaccine (AOR=0.35, 95%CI (0.22, 0.55),  $p<0.001$ ). Compared with White British participants, those from other ethnic groups were less likely to accept the vaccine. Black/Black British participants had the lowest likelihood of accepting (AOR=0.25, 95%CI (0.14, 0.43),  $p<0.001$ ). This is illustrated in the descriptive data too, with 87% of White British participants indicating vaccine acceptance compared with 58% among Black/Black British, 61% among mixed/multiple ethnic groups and 61% among Asian/Asian British.

After controlling for demographic variables, vaccine acceptance was positively associated with having been invited for vaccination (AOR=1.73, 95%CI (1.24, 2.43),  $p=0.001$ ), but negatively associated with COVID-19 status. Compared with those who had 'probably not' or 'definitely not' had COVID-19, those who thought they had 'definitely' or 'probably' had COVID-19 were less likely to indicate acceptance (AOR = 0.40, 95%CI (0.26, 0.60),  $p<0.001$  and AOR=0.71, 95%CI (0.56, 0.91),  $p=0.006$  respectively). Confirmed diagnosis with COVID-19 was not significantly associated with vaccine acceptance, after controlling for demographic variables.

### **Trust in information sources**

The three most trusted information sources were: the NHS; doctors/nurses/other healthcare professionals; and scientific and medical advisers. These groups were trusted 'completely/a great deal' by around 80% of participants (Table 3). Only 44% trusted the UK government 'completely/a great deal'. The three least trusted sources were celebrities and social media influencers, social media, and faith or community leaders; around two-thirds indicated they would have no trust in each. A majority (61%) indicated they had very little/no trust in the media (e.g., newspapers/magazines/television/radio).

Trust did not differ by gender except for drug companies and the WHO, with females more likely to indicate trust in these sources (Tables S5 and S9 respectively).

Trust was higher among older participants for five sources (doctors/nurses/other healthcare professionals, NHS, UK government, media, and family/friends; Tables S2, S4, S6, S10, S13). For example, trust in the UK government was higher among those aged 50-59 than 18-49-year-olds (Table S6).

Trust varied by education. Compared with those without qualifications, other participants were more likely to trust five sources (doctors/nurses/other healthcare professionals, NHS, scientists, WHO; Tables S2, S4, S8, S9) and less likely to trust another five (drug companies, media, social media, celebrities/social media influencers, family/friends; Tables S5, S10-S13). Compared with those 'living comfortably' participants in more difficult financial situations were less likely to trust the seven sources most closely aligned with scientific or clinical expertise (doctors/nurses/other healthcare

professionals, pharmacists, NHS, drug companies, UK government, scientists, WHO; Tables S2-S6, S8, S9). Similarly, participants from minority ethnic groups were less likely to trust scientific or clinical sources than White British participants (Tables S2-S4, S8, S9). Whilst lack of trust in faith or community leaders was low overall, Asian/Asian British participants were more likely than White British to trust faith/community leaders (AOR=4.82, 95%CI (2.76, 8.42),  $p<0.001$ ) as were Black/Black British participants (AOR=4.52, 95%CI (2.04, 9.99),  $p<0.001$ ) (Table S14).

### Views on prioritisation

Nine in ten participants rated healthcare professionals as highest priority for vaccination. Over 70% indicated those with serious health conditions/heightened vulnerability to COVID-19, care home workers and residents, and over 80s should be 'one of the first' to be vaccinated (Table 4). Priority was also given to social care workers, schoolteachers, and those directly working with the public. Over a third considered each of these groups should be 'one of the first' to be vaccinated, and 70% or more rated them in the top two priority levels. People aged under 18 were rated as lowest priority, and 6% considered the vaccine should not be offered to this group.

### Importance of second dose

Nearly all participants (96%,  $n=4,761$ ) considered it 'very' or 'fairly important' to receive the second vaccine dose. This increased to 99% ( $n=4,096$ ) amongst those who intended to accept the vaccine.

## Discussion

### Principal findings

Overall, acceptance was high, with 83% having received or intending to have the vaccine. Acceptance increased with age and education, and if invited for vaccination. It decreased with financial hardship, and among non-White British ethnicities and those with unconfirmed past COVID-19. Clinical and scientific information was most trusted, with sociodemographic differences for different sources. Policy on a second dose and vaccination priority groups<sup>1</sup> was supported.

### Comparison with other studies

We confirmed lower acceptance in younger groups;<sup>6-8,10,11</sup> acceptance was higher if invited for vaccination, a finding observed for other vaccines in other populations,<sup>23</sup> and emphasising the importance of ensuring vaccine invitations are issued, using appropriate language with translations if necessary. Confirmation of lower acceptance in non-White British ethnicities.<sup>5,6,9,24</sup> is concerning given increased risk of infection and poorer outcomes.<sup>25</sup> This lower acceptance has been reported to result from an erosion of trust with health care services as a consequence of past experiences of unethical experimental research conducted among black populations, the lack of participants from ethnic minorities included in health research, particularly vaccine trials, and poor experiences of healthcare.<sup>15</sup> Successful initiatives by primary care health professionals to overcome these barriers have been reported, but they require considerable resources.<sup>26</sup> We confirmed lower acceptance in

1  
2  
3 those with lower educational attainment and greater financial hardship,<sup>6,8-10,12,27</sup> leaving these  
4 groups at risk of infection and increasing likelihood of emergence of variants.<sup>28</sup> Gender was not  
5 associated with vaccine hesitancy in the analysis reported in this paper, but female gender has  
6 been found to be a factor associated with greater COVID-19 vaccine hesitancy in some other  
7 studies;<sup>6,8-10,29</sup> further research is needed to explore whether and why gender may relate to  
8 hesitancy.  
9

10  
11  
12 A novel finding was that there was lower vaccine acceptance among those with unconfirmed but  
13 suspected COVID-19. This suggests that prior infection is thought to confer immunity, or that  
14 recovery fosters a perception of decreased severity, but further research is needed to explore this  
15 relationship. However, past infection does not guarantee protection and people may still be  
16 infectious.<sup>30,31</sup> Messaging should target those with prior infection.  
17

18  
19 There are other implications for communications. While high acceptance suggests communications  
20 are effective, identifying barriers in hesitant groups is a priority for developing interventions.<sup>3,15,19,32</sup>  
21 Trusted information sources are needed. The most trusted were the NHS, healthcare professionals,  
22 and scientific and medical advisers. This suggests that healthcare professionals have a central role  
23 in promoting vaccination in initiatives and during consultations. That government and media are less  
24 trusted has implications for acceptance.<sup>7,8,27,33</sup> We found particularly low levels of trust in social  
25 media and celebrities. However, this does not necessarily mean that they do not influence feelings  
26 about vaccination, and, with careful research, they could still play a positive role in communications  
27 (for example, initiatives using ethnic minority celebrities and opinion leaders.<sup>16</sup>) Such initiatives  
28 would need to use pre-testing of messages to ensure they are appropriately tailored to target  
29 audiences, while avoiding stereotyping, and would require evaluation of acceptability and  
30 effectiveness.  
31

32  
33 Differences in trust varied by socio-demographics. Compared with White British participants, other  
34 ethnicities had lower trust in healthcare and scientific sources. Although trust in faith/community  
35 leaders was low, it was higher in Asian and Black British participants, suggesting a role for these  
36 leaders.<sup>15</sup> Those with lower educational attainment or financial hardship had lower trust in  
37 healthcare and scientific sources. Those with no qualifications had higher trust in media and  
38 family/friends. This suggests a need for a mix of sources for these groups. Mainstream media may  
39 have a role to play, despite lower trust.<sup>27</sup>  
40

41  
42 Reassuringly for further campaigns, for the first time, this study reported that prioritisation was  
43 considered acceptable by the general public and there was support for additional prioritisation of  
44 schoolteachers and others in direct contact with the public. This is consistent with research  
45 suggesting that healthcare workers themselves support the decision to prioritise vaccination for  
46 frontline health and social care workers and those at increased risk of vulnerability to infection.<sup>34</sup>As  
47 planning begins for further vaccination, careful communication regarding prioritisation should  
48 continue. We found high support for a second dose, suggesting the UK's decision to extend the  
49  
50  
51  
52  
53  
54  
55  
56  
57  
58  
59  
60

1  
2  
3 period between doses has not dented public confidence. While the high acceptance rate may  
4 suggest that acceptance will be similarly high in future COVID-19 vaccination programmes, this  
5 cannot be assumed. The survey was conducted during a period of considerable public anxiety, with  
6 rising infection rates and restrictions on many activities including travel. Similar acceptance rates  
7 may not be observed in future if the threat is perceived to have receded and society is functioning  
8 more normally.  
9  
10  
11

### 12 **Strengths and limitations**

13  
14 Strengths include the large probability-based nationally representative sample, ability to analyse by  
15 ethnicity and surveying during vaccine roll-out. Our findings can be generalised to GB's adult  
16 population, however global contexts for COVID-19 and vaccination vary. Although not generalisable  
17 to them, the findings are still informative for other countries. The study has limitations. As it is cross-  
18 sectional, we cannot infer causality; although we included variables likely to be important in vaccine  
19 acceptance, these results are exploratory. Our qualitative studies will deepen understanding of  
20 associations. A survey repeated when COVID-19 cases and deaths are low, and without lockdown,  
21 might yield different responses. We did not survey individuals who are institutionalised (e.g.,  
22 prisoners), notably difficult to reach (e.g., homeless), or those not speaking English (therefore, our  
23 ethnic minority sample may underrepresent certain views); specific surveys are needed for these  
24 groups. We investigated vaccination intention. Actual uptake may be lower, although it is likely that  
25 factors associated with intention will influence uptake.  
26  
27  
28  
29  
30  
31  
32

### 33 **Conclusions**

34  
35 COVID-19 vaccination acceptance is high in GB. Targeted engagement is needed to address  
36 hesitancy in non-White British ethnic groups, those with lower education, those younger, those with  
37 greater financial hardship and those with unconfirmed but suspected past infection. Healthcare  
38 professionals and scientific advisors should lead communications and tailoring is needed. Work is  
39 needed to rebuild trust in government information. There is high support for having the second  
40 vaccine dose. Views of vaccine prioritisation are mostly consistent with UK official policy but there  
41 was support for prioritising additional groups and careful communication around vaccination  
42 prioritisation should continue.  
43  
44  
45  
46  
47  
48  
49  
50  
51  
52  
53  
54  
55  
56  
57  
58  
59  
60

**Contributors:**

MS, CJ, HEB, KH, and AMM conceived the study, supported by AF, DE, and AM. MS, CJ, KA, HB, and AMM designed the questionnaire, supported by MU, AF, DE, AM, and KH. CJ and AMM acquired and analysed the data, which was interpreted by MS, CJ, HB, MU, KH and AMM. MS and AMM drafted the manuscript supported by CJ, HB, MU, and KH. KA, HB, MU, and KH critically revised the article, supported by MS, CJ, AF, DE, AM, and AMM. All authors read the final version of the manuscript and gave approval for it to be published. AMM, CJ, and MS had access to the data in the study and take responsibility for the integrity of the data and the accuracy of the data analysis. The corresponding author attests that all listed authors meet authorship criteria and that no others meeting the criteria have been omitted. MS is the guarantor.

**Ethics approval:**

The study received ethical approval from NatCen's Research Ethics Committee (ID P14307). Participants gave informed consent before taking part.

**Transparency declaration:**

The lead author and manuscript's guarantor (MS) affirms that the manuscript is an honest, accurate, and transparent account of the study being reported; that no important aspects of the study have been omitted; and that any discrepancies from the study as originally planned have been explained.

**Role of the funding source:**

The OPTIMising general public Uptake of a COVID-19 vaccine (OPTIMUM) study was supported by a UK Research & Innovation (UKRI) Ideas to Address COVID-19 award (no. ES/V012851/1). The funder had no role in the study design; in the collection, analysis, and interpretation of data; in the writing of the report; and in the decision to submit the article for publication. All researchers were independent from the funder and all authors had full access to all of the data (including statistical reports and tables) in the study and can take responsibility for the integrity of the data and the accuracy of the data analysis.

**Dissemination to participants and related patient and public communities:**

We do not plan to disseminate study results to individual study participants, however findings from the OPTIMUM study will be shared with the public via press releases, social media and interviews, and lay-audience briefing papers.

**Data sharing:**

After completion of the study, the survey dataset will be deposited in the UK Data Archive.

**Competing interests:**

All authors have completed the ICMJE uniform disclosure form at [www.icmje.org/coi\\_disclosure.pdf](http://www.icmje.org/coi_disclosure.pdf) and declare: no support from any organisation for the submitted work; KH has received another UK Research and Innovation (Economic and Social Research Council) grant on the impact of COVID-19; no other relationships or activities that could appear to have influenced the submitted work.

**Acknowledgments:**

We thank the questionnaire development and testing and survey and data delivery teams at NatCen for their work on the survey, and Professor Mark Petticrew at the London School of Hygiene & Tropical Medicine for acting as adviser to the study.

For peer review only



## References

- 1 UK Government Department of Health and Social Care. Joint Committee on Vaccination and Immunisation: advice on priority groups for COVID-19 vaccination, 30 December 2020. Jan 6, 2021. <https://www.gov.uk/government/publications/priority-groups-for-coronavirus-covid-19-vaccination-advice-from-the-jcvi-30-december-2020/joint-committee-on-vaccination-and-immunisation-advice-on-priority-groups-for-covid-19-vaccination-30-december-2020>.
- 2 MacDonald NE, SAGE Working Group on Vaccine Hesitancy. Vaccine hesitancy: definition, scope and determinants. *Vaccine* 2015;33:4161-4.
- 3 Larson HJ, Jarrett C, Eckersberger E, Smith DMD, Paterson P. Understanding vaccine hesitancy around vaccines and vaccination from a global perspective: a systematic review of published literature, 2007-2012. *Vaccine* 2014;32:2150-9.
- 4 Lane S, MacDonald NE, Marti M, Dumolard L. Vaccine hesitancy around the globe: analysis of three years of WHO/UNICEF Joint Reporting Form data—2015–2017. *Vaccine* 2018;36:3861-7.
- 5 Bell S, Clarke R, Mounier-Jack S, Walker JL, Paterson P. Parents' and guardians' views on the acceptability of a future COVID-19 vaccine: A multi-methods study in England. *Vaccine* 2020;38:7789-98.
- 6 Freeman D, Loe BS, Chadwick A, Vaccari C, Waite F, Rosebrock L, et al. COVID-19 vaccine hesitancy in the UK: the Oxford coronavirus explanations, attitudes, and narratives survey (Oceans) II. *Psychol Med* 2020; published online Dec 11. <https://dx.doi.org/10.1017/S0033291720005188>.
- 7 Lazarus JV, Ratzan SC, Palayew A, Gostin LO, Larson HJ, Rabin K, et al. A global survey of potential acceptance of a COVID-19 vaccine. *Nat Med* 2021;27:225-8. <https://doi.org/10.1038/s41591-020-1124-9>.
- 8 Murphy J, Vallières F, Bentall RP, Shevlin M, McBride O, Hartman TK, et al. Psychological characteristics associated with COVID-19 vaccine hesitancy and resistance in Ireland and the United Kingdom. *Nat Commun* 2021;12:29.
- 9 Robertson E, Reeve KS, Niedzwiedz CL, Moore J, Blake M, Green M, et al. Predictors of COVID-19 vaccine hesitancy in the UK household longitudinal study. *Brain Behav Immun* 2021;94:41-50.
- 10 Paul E, Steptoe A, Fancourt D. Attitudes towards vaccines and intention to vaccinate against COVID-19: Implications for public health communications. *Lancet Reg Health Eur* 2021;1:100012. <https://doi.org/10.1016/j.lanepe.2020.100012>
- 11 Sherman SM, Smith LE, Sim J, Amlôt R, Cutts M, Dasch H, et al. COVID-19 vaccination intention in the UK: results from the COVID-19 Vaccination Acceptability Study (CoVAccS), a nationally representative cross-sectional survey. *Hum Vaccin Immunother* 2020;26:1-10.
- 12 Williams L, Flowers P, McLeod J, Young D, Rollins L. The Catalyst Project Team. Social patterning and stability of intention to accept a COVID-19 vaccine in Scotland: will those most at risk accept a vaccine? *Vaccines (Basel)* 2021;9:17.

- 1  
2  
3 13 Office for National Statistics. Coronavirus (COVID-19) latest insights. Apr 16, 2021.  
4 [https://www.ons.gov.uk/peoplepopulationandcommunity/healthandsocialcare/conditionsanddiseases](https://www.ons.gov.uk/peoplepopulationandcommunity/healthandsocialcare/conditionsanddiseases/articles/coronaviruscovid19/latestinsights#vaccinations)  
5 [/articles/coronaviruscovid19/latestinsights#vaccinations](https://www.ons.gov.uk/peoplepopulationandcommunity/healthandsocialcare/conditionsanddiseases/articles/coronaviruscovid19/latestinsights#vaccinations). [Accessed Apr 19 2021].  
6  
7  
8 14 Mahase E. Covid-19: Booster vaccine to be rolled out in autumn as UK secures 60m more Pfizer  
9 doses. *BMJ* 2021;373:n1116.  
10  
11 15 Razai MS, Chaudhry UAR, Doerholt K, Bauld L, Majeed A. Covid-19 vaccination hesitancy. *BMJ*  
12 2021;373:n1138.  
13  
14 16 Mohdin A. BAME groups urged to have Covid vaccine in UK TV ad campaign. *The Guardian*,  
15 Feb 18, 2021. [https://www.theguardian.com/world/2021/feb/18/bame-groups-urged-to-have-covid-](https://www.theguardian.com/world/2021/feb/18/bame-groups-urged-to-have-covid-vaccine-in-uk-tv-ad-campaign)  
16 [vaccine-in-uk-tv-ad-campaign](https://www.theguardian.com/world/2021/feb/18/bame-groups-urged-to-have-covid-vaccine-in-uk-tv-ad-campaign).  
17  
18 17 Sewell HF, Robertson JFR, Stewart M, Kendrick D, Bird SM. Revisiting the UK's strategy for  
19 delaying the second dose of the Pfizer covid-19 vaccine. Jan 20, 2021.  
20  
21 [https://blogs.bmj.com/bmj/2021/01/20/revisiting-the-uks-strategy-for-delaying-the-second-dose-of-](https://blogs.bmj.com/bmj/2021/01/20/revisiting-the-uks-strategy-for-delaying-the-second-dose-of-the-pfizer-covid-19-vaccine/)  
22 [the-pfizer-covid-19-vaccine/](https://blogs.bmj.com/bmj/2021/01/20/revisiting-the-uks-strategy-for-delaying-the-second-dose-of-the-pfizer-covid-19-vaccine/).  
23  
24 18 von Elm E, Altman DG, Egger M, Pocock SJ, Gøtzsche PC, Vandenbroucke JP. Strengthening  
25 the Reporting of Observational Studies in Epidemiology (STROBE) statement: guidelines for  
26 reporting observational studies. *BMJ*. 2007;335:806-808.  
27  
28 19 World Health Organization Regional Office for Europe. Survey Tool and Guidance. Rapid,  
29 simple, flexible behavioural insights on COVID-19. Copenhagen: WHO Regional Office for Europe;  
30 2020. [https://www.euro.who.int/\\_\\_data/assets/pdf\\_file/0007/436705/COVID-19-survey-tool-and-](https://www.euro.who.int/__data/assets/pdf_file/0007/436705/COVID-19-survey-tool-and-guidance.pdf?ua=1)  
31 [guidance.pdf?ua=1](https://www.euro.who.int/__data/assets/pdf_file/0007/436705/COVID-19-survey-tool-and-guidance.pdf?ua=1).  
32  
33 20 Gallup. Ch 5 Attitudes to vaccines. In: Gallup. Wellcome Global Monitor. How does the world feel  
34 about science and health? London: Wellcome Trust, 2019: 104-25.  
35  
36 <https://cms.wellcome.org/sites/default/files/wellcome-global-monitor-2018.pdf>.  
37  
38 21 Collins D. Cognitive Interviewing Practice. London: SAGE Publications Ltd, 2014.  
39  
40 22 Jessop C. The NatCen Panel: developing an open probability-based mixed-mode panel in Great  
41 Britain. *Soc Res Pract* 2018;6:2-14. [https://the-](https://the-sra.org.uk/Common/Uploaded%20files/Social%20Research%20Practice%20Journal/social-research-practice-journal-issue-06-summer-2018.pdf)  
42 [sra.org.uk/Common/Uploaded%20files/Social%20Research%20Practice%20Journal/social-](https://the-sra.org.uk/Common/Uploaded%20files/Social%20Research%20Practice%20Journal/social-research-practice-journal-issue-06-summer-2018.pdf)  
43 [research-practice-journal-issue-06-summer-2018.pdf](https://the-sra.org.uk/Common/Uploaded%20files/Social%20Research%20Practice%20Journal/social-research-practice-journal-issue-06-summer-2018.pdf).  
44  
45 23 Jacobson Vann JC, Jacobson RM, Coyne-Beasley T, Asafu-Adjei JK, Szilagyi PG. Patient  
46 reminder and recall interventions to improve immunization rates. *Cochrane Database Syst Rev*  
47 2018;1:CD003941.  
48  
49 24 Thorneloe R, Wilcockson H, Lamb M, Jordan CH, Arden M. Willingness to receive a COVID-19  
50 vaccine among adults at high-risk of COVID-19: a UK-wide survey. *PsyArXiv* 2020; published online  
51 Jul 20. <https://psyarxiv.com/fs9wk> (preprint).  
52  
53 25 Mathur R, Rentsch CT, Morton CE, Hulme WJ, Schultze A, MacKenna B, et al. Ethnic  
54 differences in SARS-CoV-2 infection and COVID-19-related hospitalisation, intensive care unit  
55  
56  
57  
58  
59  
60

1  
2  
3 admission, and death in 17 million adults in England: an observational cohort study using the  
4 OpenSAFELY platform. *Lancet*. 2021;397:1711-24.

5  
6 26 Mahase E. Covid-19 vaccines: GPs boost uptake by calling patients and teaming up with  
7 community groups *BMJ* 2021;374:n2093.

8  
9 27 Allington D, McAndrew S, Moxham-Hall V, Duffy B. Coronavirus conspiracy suspicions, general  
10 vaccine attitudes, trust and coronavirus information source as predictors of vaccine hesitancy  
11 among UK residents during the COVID-19 pandemic. *Psychol Med* 2021; published online April 12.  
12 <https://doi.org/10.1017/s0033291721001434>

13  
14 28 Sah P, Vilches TN, Moghadas SM, Fitzpatrick MC, Singer BH, Hotez PJ, et al. Accelerated  
15 vaccine rollout is imperative to mitigate highly transmissible COVID-19 variants. *EClinicalMedicine*  
16 2021;35:100865.

17  
18 29 Malik AA, McFadden SM, Elharake J, Omer SB. Determinants of COVID-19 vaccine acceptance  
19 in the US. *EClinicalMedicine*. 2020;26:100495. <https://doi.org/10.1016/j.eclinm.2020.100495>

20  
21 30 Hansen CH, Michlmayr D, Gubbels SM, Mølbak K, Ethelberg S. Assessment of protection  
22 against reinfection with SARS-CoV-2 among 4 million PCR-tested individuals in Denmark in 2020: a  
23 population-level observational study. *Lancet* 2021;397:1204-12.

24  
25 31 Hall VJ, Foulkes S, Charlett A, Atti A, Monk EJM, Simmons R, et al. SARS-CoV-2 infection rates  
26 of antibody-positive compared with antibody-negative health-care workers in England: a large,  
27 multicentre, prospective cohort study (SIREN). *Lancet* 2021;397:1459-69.

28  
29 32 Lockyer B, Islam S, Rahman A, Dickerson J, Pickett K, Sheldon T, et al. Understanding COVID-  
30 19 misinformation and vaccine hesitancy in context: Findings from a qualitative study involving  
31 citizens in Bradford, UK. *Health Expect* 2021; published online May 4.  
32 <https://dx.doi.org/10.1111/hex.13240>

33  
34 33 Williams L, Gallant AJ, Rasmussen S, Brown Nicholls LA, Cogan N, et al. Towards intervention  
35 development to increase the uptake of COVID-19 vaccination among those at high risk: Outlining  
36 evidence-based and theoretically informed future intervention content. *Br J Health Psychol*  
37 2020;25:1039-54.

38  
39 34 Manby R, Dowrick A, Karia A, Maio L, Buck C, Singleton G, et al. Healthcare workers'  
40 perceptions and attitudes towards the UK's COVID-19 vaccination programme. *medRxiv* 2021;  
41 published online Mar 31. <https://doi.org/10.1101/2021.03.30.21254459> (preprint).  
42  
43  
44  
45  
46  
47  
48  
49  
50  
51  
52  
53  
54  
55  
56  
57  
58  
59  
60

**Table 1** Sample characteristics

|                                                                          | Unweighted |      | Weighted |      |
|--------------------------------------------------------------------------|------------|------|----------|------|
|                                                                          | n          | %    | n        | %    |
| <b>Age</b>                                                               |            |      |          |      |
| 18-29                                                                    | 464        | 9.4  | 824      | 16.7 |
| 30-39                                                                    | 772        | 15.6 | 852      | 17.3 |
| 40-49                                                                    | 848        | 17.1 | 806      | 16.3 |
| 50-59                                                                    | 904        | 18.3 | 867      | 17.6 |
| 60-69                                                                    | 1011       | 20.4 | 711      | 14.4 |
| 70-79                                                                    | 773        | 15.6 | 657      | 13.3 |
| 80+                                                                      | 178        | 3.6  | 218      | 4.4  |
| <b>Gender</b>                                                            |            |      |          |      |
| Male                                                                     | 2136       | 42.9 | 2402     | 48.3 |
| Female                                                                   | 2830       | 56.9 | 2567     | 51.6 |
| Other                                                                    | 10         | 0.2  | 7        | 0.1  |
| <b>Ethnicity</b>                                                         |            |      |          |      |
| White British                                                            | 4261       | 86.3 | 3999     | 81.2 |
| Any other White background                                               | 319        | 6.5  | 335      | 6.8  |
| Mixed or multiple ethnic groups                                          | 64         | 1.3  | 100      | 2.0  |
| Asian or Asian British                                                   | 164        | 3.3  | 306      | 6.2  |
| Black or Black British                                                   | 67         | 1.4  | 101      | 2.1  |
| Other                                                                    | 62         | 1.3  | 81       | 1.6  |
| <b>Country</b>                                                           |            |      |          |      |
| England                                                                  | 4369       | 87.9 | 4291     | 86.3 |
| Scotland                                                                 | 390        | 7.8  | 442      | 8.9  |
| Wales                                                                    | 212        | 4.3  | 237      | 4.8  |
| <b>Urban/rural status<sup>#</sup></b>                                    |            |      |          |      |
| Urban                                                                    | 3789       | 76.2 | 4006     | 80.6 |
| Rural                                                                    | 1182       | 23.8 | 965      | 19.4 |
| <b>Highest educational qualification</b>                                 |            |      |          |      |
| Degree or equivalent, and above                                          | 2503       | 50.4 | 2077     | 41.8 |
| A levels or vocational level 3 or equivalent and above, but below degree | 1005       | 20.2 | 1131     | 22.8 |
| Other qualifications below A levels or vocational level 3 or equivalent  | 788        | 15.9 | 838      | 16.9 |
| Other qualification                                                      | 256        | 5.2  | 304      | 6.1  |
| No qualifications                                                        | 416        | 8.4  | 618      | 12.4 |
| <b>Subjective Financial Status</b>                                       |            |      |          |      |
| Living comfortably                                                       | 1552       | 31.2 | 1289     | 26.0 |
| Doing alright                                                            | 2028       | 40.8 | 2035     | 40.9 |
| Just about getting by                                                    | 975        | 19.6 | 1132     | 22.8 |
| Finding it quite difficult                                               | 271        | 5.5  | 337      | 6.8  |
| Finding it very difficult                                                | 142        | 2.9  | 175      | 3.5  |
| <b>COVID-19 Status</b>                                                   |            |      |          |      |
| Diagnosed with COVID-19                                                  | 241        | 4.8  | 294      | 5.9  |
| Think definitely had COVID-19                                            | 140        | 2.8  | 172      | 3.5  |
| Think probably had COVID-19                                              | 710        | 14.3 | 755      | 15.2 |

1  
2  
3  
4  
5  
6  
7  
8  
9  
10  
11  
12  
13  
14  
15  
16  
17  
18  
19  
20  
21  
22  
23  
24  
25  
26  
27  
28  
29  
30  
31  
32  
33  
34  
35  
36  
37  
38  
39  
40  
41  
42  
43  
44  
45  
46  
47  
48  
49  
50  
51  
52  
53  
54  
55  
56  
57  
58  
59  
60

|                                   |      |      |      |      |
|-----------------------------------|------|------|------|------|
| Think probably not had COVID-19   | 1945 | 39.1 | 1880 | 37.8 |
| Think definitely not had COVID-19 | 1393 | 28.0 | 1305 | 26.2 |
| Don't know if had COVID-19        | 547  | 11.0 | 566  | 11.4 |

# England and Wales, based on Office for National Statistics (ONS) definition of urban as population greater than 10,000.  
Scotland based on Scottish Government definition of urban as population greater than 3,000.

For peer review only

**Table 2** Association between vaccine acceptance and sociodemographic variables – (a) bivariate results and (b) multivariate logistic regression.

|                                             | <b>(a) Bivariate associations between vaccine acceptance and socio-demographics</b><br>% Accepted/Intend to Accept (weighted)<br>$\chi^2$ test for differences by demographics |      |               |       | <b>(b) Logistic regression of vaccine acceptance</b><br>1 = Accepted/Intend to Accept (4294), 0 = Uncertain/Refused/Intend to Refuse (600) |      |              |              |       |
|---------------------------------------------|--------------------------------------------------------------------------------------------------------------------------------------------------------------------------------|------|---------------|-------|--------------------------------------------------------------------------------------------------------------------------------------------|------|--------------|--------------|-------|
|                                             | n                                                                                                                                                                              | %    | $\chi^2$ (df) | P     | N                                                                                                                                          | AOR* | 95% CI Lower | 95% CI Upper | P     |
| <b>Gender</b>                               |                                                                                                                                                                                |      | 2.154 (2)     | .341  |                                                                                                                                            |      |              |              | 0.085 |
| Male                                        | 2012                                                                                                                                                                           | 83.8 |               |       | 2097                                                                                                                                       | ref  |              |              |       |
| Female                                      | 2117                                                                                                                                                                           | 82.5 |               |       | 2788                                                                                                                                       | 0.82 | 0.67         | 0.99         | 0.036 |
| Other                                       | 5                                                                                                                                                                              | 71.4 |               |       | 9                                                                                                                                          | 0.47 | 0.09         | 2.45         | 0.369 |
| <b>Age</b>                                  |                                                                                                                                                                                |      | 274.733 (6)   | <.001 |                                                                                                                                            |      |              |              | <.001 |
| 18-29                                       | 613                                                                                                                                                                            | 74.4 |               |       | 459                                                                                                                                        | ref  |              |              |       |
| 30-39 v 18-29                               | 618                                                                                                                                                                            | 72.5 |               |       | 761                                                                                                                                        | 0.89 | 0.66         | 1.20         | .448  |
| 40-49 v 18-39                               | 640                                                                                                                                                                            | 79.3 |               |       | 835                                                                                                                                        | 1.43 | 1.12         | 1.83         | .004  |
| 50-59 v 18-49                               | 745                                                                                                                                                                            | 85.9 |               |       | 896                                                                                                                                        | 1.92 | 1.49         | 2.46         | <.001 |
| 60-69 v 18-59                               | 659                                                                                                                                                                            | 92.7 |               |       | 1003                                                                                                                                       | 3.21 | 2.37         | 4.34         | <.001 |
| 70-79 v 18-69                               | 629                                                                                                                                                                            | 95.7 |               |       | 763                                                                                                                                        | 3.31 | 2.22         | 4.95         | <.001 |
| 80+ v 18-79                                 | 209                                                                                                                                                                            | 95.9 |               |       | 177                                                                                                                                        | 2.19 | 0.92         | 5.21         | .078  |
| <b>Education/Highest qualification</b>      |                                                                                                                                                                                |      | 56.056 (4)    | <.001 |                                                                                                                                            |      |              |              | <.001 |
| No qualifications                           | 495                                                                                                                                                                            | 80.1 |               |       | 411                                                                                                                                        | ref  |              |              |       |
| Degree or equivalent and above              | 1811                                                                                                                                                                           | 87.2 |               |       | 2454                                                                                                                                       | 3.03 | 2.17         | 4.23         | <.001 |
| A levels / Vocational level 3 or equivalent | 909                                                                                                                                                                            | 80.4 |               |       | 990                                                                                                                                        | 1.80 | 1.27         | 2.55         | <.001 |
| Other qual'ns below A level / Voc level 3   | 694                                                                                                                                                                            | 82.7 |               |       | 784                                                                                                                                        | 1.50 | 1.05         | 2.15         | .026  |
| Other qualification                         | 223                                                                                                                                                                            | 73.4 |               |       | 255                                                                                                                                        | 0.90 | 0.58         | 1.39         | .632  |
| <b>Financial Status</b>                     |                                                                                                                                                                                |      | 168.660 (4)   | <.001 |                                                                                                                                            |      |              |              | <.001 |
| Living comfortably                          | 1162                                                                                                                                                                           | 90.1 |               |       | 1533                                                                                                                                       | ref  |              |              |       |
| Doing alright                               | 1749                                                                                                                                                                           | 86.0 |               |       | 1998                                                                                                                                       | 0.89 | 0.69         | 1.15         | .383  |
| Just about getting by                       | 848                                                                                                                                                                            | 74.9 |               |       | 959                                                                                                                                        | 0.52 | 0.39         | 0.69         | <.001 |
| Finding it quite difficult                  | 261                                                                                                                                                                            | 77.2 |               |       | 266                                                                                                                                        | 0.74 | 0.50         | 1.10         | .139  |
| Finding it very difficult                   | 111                                                                                                                                                                            | 63.4 |               |       | 138                                                                                                                                        | 0.35 | 0.22         | 0.55         | <.001 |
| <b>Country</b>                              |                                                                                                                                                                                |      | 3.171 (2)     | .205  |                                                                                                                                            |      |              |              | .326  |
| England                                     | 3581                                                                                                                                                                           | 83.5 |               |       | 4302                                                                                                                                       | ref  |              |              |       |
| Scotland                                    | 356                                                                                                                                                                            | 80.5 |               |       | 384                                                                                                                                        | 0.82 | 0.59         | 1.13         | .220  |
| Wales                                       | 192                                                                                                                                                                            | 81.0 |               |       | 208                                                                                                                                        | 0.80 | 0.51         | 1.26         | .345  |
| <b>Urban/rural</b>                          |                                                                                                                                                                                |      | 34.517 (1)    | <.001 |                                                                                                                                            |      |              |              |       |
| Urban                                       | 3266                                                                                                                                                                           | 81.5 |               |       | 3729                                                                                                                                       | ref  |              |              |       |
| Rural                                       | 863                                                                                                                                                                            | 89.4 |               |       | 1165                                                                                                                                       | 1.28 | 1.00         | 1.65         | .051  |
| <b>Ethnicity</b>                            |                                                                                                                                                                                |      | 246.434 (5)   | <.001 |                                                                                                                                            |      |              |              | <.001 |
| White British                               | 3482                                                                                                                                                                           | 87.1 |               |       | 4226                                                                                                                                       | ref  |              |              |       |
| Any other white background                  | 254                                                                                                                                                                            | 75.8 |               |       | 318                                                                                                                                        | 0.55 | 0.40         | 0.76         | <.001 |
| Mixed or multiple ethnic groups             | 62                                                                                                                                                                             | 61.4 |               |       | 62                                                                                                                                         | 0.39 | 0.21         | 0.71         | .002  |
| Asian or Asian British                      | 188                                                                                                                                                                            | 61.4 |               |       | 161                                                                                                                                        | 0.41 | 0.28         | 0.61         | <.001 |
| Black or Black British                      | 59                                                                                                                                                                             | 58.4 |               |       | 67                                                                                                                                         | 0.25 | 0.14         | 0.43         | <.001 |
| Other                                       | 59                                                                                                                                                                             | 72.8 |               |       | 60                                                                                                                                         | 0.42 | 0.23         | 0.79         | .007  |
| <b>Whether been offered vaccine</b>         |                                                                                                                                                                                |      | 45.924 (1)    | <.001 |                                                                                                                                            |      |              |              |       |
| No                                          | 3479                                                                                                                                                                           | 81.6 |               |       | 4227                                                                                                                                       | ref  |              |              |       |
| Yes                                         | 658                                                                                                                                                                            | 91.9 |               |       | 667                                                                                                                                        | 1.73 | 1.24         | 2.43         | .001  |
| <b>COVID-19 Status</b>                      |                                                                                                                                                                                |      | 72.865 (4)    | <.001 |                                                                                                                                            |      |              |              | <.001 |

|                                                      |      |      |  |  |  |                                                                                                                                                                                                                                                           |      |      |      |       |
|------------------------------------------------------|------|------|--|--|--|-----------------------------------------------------------------------------------------------------------------------------------------------------------------------------------------------------------------------------------------------------------|------|------|------|-------|
| Think probably or definitely <u>not</u> had COVID-19 | 2741 | 86.1 |  |  |  | 3288                                                                                                                                                                                                                                                      | ref  |      |      |       |
| Diagnosed with COVID-19                              | 218  | 74.4 |  |  |  | 240                                                                                                                                                                                                                                                       | 0.89 | 0.60 | 1.33 | .575  |
| Think definitely had COVID-19                        | 118  | 68.2 |  |  |  | 140                                                                                                                                                                                                                                                       | 0.40 | 0.26 | 0.60 | <.001 |
| Think probably had COVID-19                          | 598  | 79.1 |  |  |  | 691                                                                                                                                                                                                                                                       | 0.71 | 0.56 | 0.91 | .006  |
| Don't Know if had COVID-19                           | 462  | 81.5 |  |  |  | 535                                                                                                                                                                                                                                                       | 0.73 | 0.55 | 0.97 | .031  |
|                                                      |      |      |  |  |  | Hosmer & Lemeshow $\chi^2= 7.444$ , $df=8$ , $p=0.490$ .<br>Final model $\chi^2=497.429$ , $df=29$ , $p<0.001$<br>Nagelkerke = 0.184<br>Cases correctly classified: 88.1%.<br>84 cases excluded due to missing data on one or more independent variables. |      |      |      |       |

\* adjusted for all other variables in the model, AOR, adjusted odds ratio; ref, reference category; 95%CI, 95% confidence interval

**Table 3** Trust in potential sources of information on COVID-19 vaccine

| Source:                                                   | Level of Trust (trust completely [1]...not at all [5]) |      |                  |      |              |      |                 |      |                |      | Mean | Std Dev |
|-----------------------------------------------------------|--------------------------------------------------------|------|------------------|------|--------------|------|-----------------|------|----------------|------|------|---------|
|                                                           | Completely (1)                                         |      | A great deal (2) |      | Somewhat (3) |      | Very little (4) |      | Not at all (5) |      |      |         |
|                                                           | n                                                      | %    | n                | %    | n            | %    | n               | %    | n              | %    |      |         |
| The NHS                                                   | 2084                                                   | 41.9 | 1902             | 38.3 | 701          | 14.1 | 155             | 3.1  | 127            | 2.5  | 1.86 | 0.95    |
| Doctors, nurses or other healthcare professionals         | 1918                                                   | 38.6 | 2092             | 42.1 | 714          | 14.4 | 154             | 3.1  | 90             | 1.8  | 1.87 | 0.90    |
| Scientific and medical advisers                           | 1798                                                   | 36.2 | 2101             | 42.3 | 792          | 15.9 | 160             | 3.2  | 121            | 2.4  | 1.94 | 0.93    |
| The World Health Organisation (WHO)                       | 1313                                                   | 26.4 | 2016             | 40.6 | 1070         | 21.6 | 310             | 6.2  | 256            | 5.1  | 2.23 | 1.07    |
| Pharmacists                                               | 999                                                    | 20.1 | 1973             | 39.7 | 1434         | 28.8 | 341             | 6.9  | 226            | 4.5  | 2.36 | 1.02    |
| The UK Government                                         | 654                                                    | 13.2 | 1542             | 31.1 | 1739         | 35.1 | 614             | 12.4 | 402            | 8.1  | 2.71 | 1.10    |
| Scottish Govt/Welsh Assembly <sup>a</sup>                 | 118                                                    | 17.4 | 189              | 27.9 | 207          | 30.5 | 88              | 13.1 | 75             | 11.1 | 2.72 | 1.21    |
| Drug companies who manufacture vaccines                   | 406                                                    | 8.2  | 1064             | 21.4 | 2065         | 41.6 | 771             | 15.5 | 661            | 13.3 | 3.04 | 1.11    |
| Family and friends                                        | 343                                                    | 6.9  | 876              | 17.6 | 2230         | 44.9 | 977             | 19.7 | 542            | 10.9 | 3.10 | 1.04    |
| The media (e.g. newspapers, magazines, television, radio) | 86                                                     | 1.7  | 302              | 6.1  | 1567         | 31.5 | 1433            | 28.9 | 1580           | 31.8 | 3.83 | 1.00    |
| Faith or community leaders                                | 131                                                    | 2.6  | 124              | 2.5  | 619          | 12.5 | 827             | 16.7 | 3264           | 65.7 | 4.40 | 0.98    |
| Social media (e.g. Twitter, Facebook, Instagram etc)      | 65                                                     | 1.3  | 69               | 1.4  | 506          | 10.2 | 1267            | 25.5 | 3056           | 61.6 | 4.45 | 0.83    |
| Celebrities and social media influencers                  | 60                                                     | 1.2  | 71               | 1.4  | 493          | 9.9  | 1175            | 23.6 | 3170           | 63.8 | 4.47 | 0.82    |

Base: All participants (weighted). Missing cases range from n=3 to n=27. <sup>a</sup>Base: all participants in Scotland or Wales, n=679 (weighted). List order was randomised for each participant.



**Table 4** Views on priority groups for vaccination: who should be first and last groups vaccinated

|                                                                                  | Should not be offered |     | Priority of being offered <sup>a</sup> |      |      |      |      |      |      |      |                     |      | Mean <sup>b</sup> | Std Dev |
|----------------------------------------------------------------------------------|-----------------------|-----|----------------------------------------|------|------|------|------|------|------|------|---------------------|------|-------------------|---------|
|                                                                                  |                       |     | One of the first (1)                   |      | (2)  |      | (3)  |      | (4)  |      | One of the last (5) |      |                   |         |
|                                                                                  | n                     | %   | n                                      | %    | n    | %    | n    | %    | n    | %    | n                   | %    |                   |         |
| Doctors, nurses and other healthcare professionals                               | 33                    | 0.7 | 4472                                   | 90.0 | 280  | 5.6  | 83   | 1.7  | 15   | 0.3  | 83                  | 1.7  | 1.17              | 0.63    |
| People with serious health conditions which mean they are vulnerable to COVID-19 | 35                    | 0.7 | 4017                                   | 80.9 | 671  | 13.5 | 129  | 2.6  | 35   | 0.7  | 77                  | 1.6  | 1.27              | 0.69    |
| Care home workers                                                                | 36                    | 0.7 | 3926                                   | 79.0 | 683  | 13.8 | 197  | 4.0  | 58   | 1.2  | 66                  | 1.3  | 1.31              | 0.72    |
| Residents in a care home                                                         | 47                    | 0.9 | 3593                                   | 72.4 | 734  | 14.8 | 337  | 6.8  | 123  | 2.5  | 131                 | 2.6  | 1.47              | 0.93    |
| People aged 80 or over                                                           | 49                    | 1.0 | 3613                                   | 72.9 | 706  | 14.2 | 304  | 6.1  | 118  | 2.4  | 168                 | 3.4  | 1.48              | 0.96    |
| Social care workers                                                              | 33                    | 0.7 | 2683                                   | 54.0 | 1348 | 27.2 | 683  | 13.8 | 143  | 2.9  | 75                  | 1.5  | 1.70              | 0.92    |
| Schoolteachers                                                                   | 47                    | 0.9 | 2098                                   | 42.2 | 1621 | 32.6 | 886  | 17.8 | 223  | 4.5  | 94                  | 1.9  | 1.90              | 0.97    |
| People with jobs that involve direct contact with members of the public          | 45                    | 0.9 | 1864                                   | 37.5 | 1603 | 32.3 | 1157 | 23.3 | 228  | 4.6  | 70                  | 1.4  | 1.99              | 0.96    |
| People aged 31-50                                                                | 43                    | 0.9 | 154                                    | 3.1  | 614  | 12.4 | 2096 | 42.2 | 1486 | 30.0 | 568                 | 11.4 | 3.35              | 0.95    |
| People aged 18-30                                                                | 102                   | 2.0 | 123                                    | 2.5  | 289  | 5.8  | 943  | 19.0 | 1375 | 27.7 | 2130                | 42.9 | 4.05              | 1.05    |
| People aged under 18                                                             | 282                   | 5.7 | 148                                    | 3.0  | 253  | 5.1  | 657  | 13.3 | 831  | 16.8 | 2788                | 56.2 | 4.25              | 1.08    |

Base: All participants (weighted). <sup>a</sup> Missing cases range from n=11 to n=21. <sup>b</sup> Excludes 'should not be offered', missing cases range from n=45 to n=301. List order was randomised for each participant.

## Supplementary material to ‘A national survey of attitudes towards and intentions to vaccinate against COVID-19: implications for communications’.

### Contents

- Methods S1: Questionnaire for the OPTIMising general public Uptake of a COVID-19 vaccine (OPTIMUM) study.
- Table S1 Overall response rate calculation accounting for recruitment onto original panel and panel attrition.
- Methods S2: Non-response weights.
- Table S2 Doctors, nurses or other healthcare professionals – Association between trust in sources of information about COVID-19 vaccine and socio-demographic variables – (a) bivariate results and (b) multivariate logistic regression.
- Table S3 Pharmacists – Association between trust in sources of information about COVID-19 vaccine and socio-demographic variables – (a) bivariate results and (b) multivariate logistic regression.
- Table S4 The NHS – Association between trust in sources of information about COVID-19 vaccine and socio-demographic variables – (a) bivariate results and (b) multivariate logistic regression.
- Table S5 Drug companies who manufacture vaccines – Association between trust in sources of information about COVID-19 vaccine and socio-demographic variables – (a) bivariate results and (b) multivariate logistic regression.
- Table S6 The UK Government – Association between trust in sources of information about COVID-19 vaccine and socio-demographic variables – (a) bivariate results and (b) multivariate logistic regression.
- Table S7 The Scottish/Welsh Government – Association between trust in sources of information about COVID-19 vaccine and socio-demographic variables – (a) bivariate results and (b) multivariate logistic regression.
- Table S8 Scientific and medical advisers – Association between trust in sources of information about COVID-19 vaccine and socio-demographic variables – (a) bivariate results and (b) multivariate logistic regression.
- Table S9 The World Health Organisation (WHO) – Association between trust in sources of information about COVID-19 vaccine and socio-demographic variables – (a) bivariate results and (b) multivariate logistic regression.
- Table S10 The media (e.g. newspapers, magazines, television, radio) – Association between trust in sources of information about COVID-19 vaccine and socio-demographic variables – (a) bivariate results and (b) multivariate logistic regression.
- Table S11 Social media – Association between trust in sources of information about COVID-19 vaccine and socio-demographic variables – (a) bivariate results and (b) multivariate logistic regression.
- Table S12 Celebrities and social media influencers – Association between trust in sources of information about COVID-19 vaccine and socio-demographic variables – (a) bivariate results and (b) multivariate logistic regression.
- Table S13 Family and friends – Association between trust in sources of information about COVID-19 vaccine and socio-demographic variables – (a) bivariate results and (b) multivariate logistic regression.
- Table S14 Faith or community leaders – Association between trust in sources of information about COVID-19 vaccine and socio-demographic variables – (a) bivariate results and (b) multivariate logistic regression.

**Methods S1: Questionnaire for the OPTIMising general public Uptake of a COVID-19 vaccine (OPTIMUM) study**

**Socio-demographic questions**

{ASK IF DemogUpd = 0}

EconAct

Which of these descriptions applied to what you spent the **most** time doing last week, that is the seven days ending last Sunday?

\_WEB: "Please select one answer on every row"

\_TEL: "INTERVIEWER: READ OUT EACH STATEMENT AND THE ANSWER CODES. REPEAT ANSWER CODES AS REQUIRED."

1. In full-time education (including on vacation)
2. On government training/employment programme
3. In paid work (or away temporarily, including furlough) for at least 10 hours in week
4. Waiting to take up paid work already accepted
5. Unemployed
6. Permanently sick or disabled
7. Wholly retired from work
8. Looking after your home or family
9. Doing something else

{ASK ALL}

C19HiRsk

Since the start of the COVID-19 outbreak, have you ever been contacted by your GP or Healthcare Provider to say that you are at severe risk from COVID-19 and advised to shield?

1. Yes
2. No
3. Don't know

{ASK ALL}

C19HiRskHH

And since the start of the COVID-19 outbreak, has anyone else in your household ever been contacted by their GP or Healthcare Provider to say that they are at severe risk from COVID-19 and advised to shield?

1. Yes
2. No
3. Don't know

{ASK IF FF\_Sex = 2 AND FF\_Age LT 50}

Preg

"Are you currently pregnant?"

1. Yes
2. No

{ASK IF Cur\_EconAct = 3 OR EconAct = 3}

EmpCond [MULTICODE: RANDOMISE 1...3]

"Which, if any, of the following apply to you?"

\_WEB: "Please select all that apply"

\_TEL: "INTERVIEWER: READ OUT EACH OPTION AND CODE ALL THAT APPLY"

1. In my current job I'm required to work in close proximity with other people
2. I work in social care and have direct contact with patients or members of the public
3. I work in health care and have direct contact with patients or members of the public
4. None of these [EXCLUSIVE]

**Vaccines****{ASK ALL}****VaccQInt**

“The next set of questions will ask you about your views on <b>vaccines in general</b>.”

DISPLAY

**{ASK ALL}****VaccSafe [FLIP SCALE]**

In general, how often do you think vaccines cause serious side effects?

\_WEB: “Please select one answer on every row”

\_TEL: “INTERVIEWER: READ OUT EACH STATEMENT AND THE ANSWER CODES. REPEAT ANSWER CODES AS REQUIRED.”

1. Always
2. Frequently
3. Sometimes
4. Rarely
5. Never

**{ASK ALL}****VaccMildSE [FLIP SCALE]**

In general, how likely would you be to accept a vaccine that caused mild side effects?

By mild side effects we mean things like a mild fever, pain or swelling at the injection site, or feeling a bit unwell for a few days

\_WEB: “Please select one answer on every row”

\_TEL: “INTERVIEWER: READ OUT EACH STATEMENT AND THE ANSWER CODES. REPEAT ANSWER CODES AS REQUIRED.”

1. Very likely
2. Quite likely
3. Neither likely nor unlikely
4. Quite unlikely
5. Very unlikely

**{ASK ALL}****VaccEffec [FLIP SCALE]**

How much protection do you think the flu vaccine provides against flu?

INTERVIEWER: READ OUT

1. Complete protection
2. A lot of protection
3. Some protection
4. A little protection
5. No protection at all

**{ASK ALL}****VaccAtt [GRID; FLIP SCALE; RANDOMISE ROWS]**

“{WEB: “Below are”; TEL: “I will now read out”} some statements about <b>vaccines in general</b>.”

To what extent do you agree or disagree with each of the following?

\_WEB: “Please select one answer on every row”

\_TEL: “INTERVIEWER: READ OUT EACH STATEMENT AND THE ANSWER CODES. REPEAT ANSWER CODES AS REQUIRED.”

## GRID ROWS

1. Government decisions about vaccines are made in people's best interests
2. My immune system is strong enough that I don't need most vaccines
3. The illnesses that vaccines prevent are not severe enough for me to get vaccinated
4. I get vaccinated because it helps to protect other people as well as me
5. I follow the recommendation of healthcare professionals when deciding whether or not to get a vaccine

## GRID COLS

1. Strongly agree
2. Agree
3. Neither agree nor disagree
4. Disagree
5. Strongly disagree

**{ASK ALL}****VaccAccepCh [FLIP SCALE 1...4]**

Thinking about times a healthcare professional has recommended <b>your children</b> get a vaccine, how often have you followed that recommendation (that is, if you have any children)?

\_WEB: "Please select one answer on every row"

\_TEL: "INTERVIEWER: READ OUT EACH STATEMENT AND THE ANSWER CODES. REPEAT ANSWER CODES AS REQUIRED."

1. All of the time
2. Most of the time
3. Some of the time
4. None of the time
5. They have never been offered a vaccine
6. I do not have any children

**{ASK ALL}****VaccAccep [FLIP SCALE 1...4]**

And thinking about times a health-care professional has recommended <b>you</b> get a vaccine, how often have you followed that recommendation?

\_WEB: "Please select one answer on every row"

\_TEL: "INTERVIEWER: READ OUT EACH STATEMENT AND THE ANSWER CODES. REPEAT ANSWER CODES AS REQUIRED."

1. All of the time
2. Most of the time
3. Some of the time
4. None of the time
5. I have never been offered a vaccine

**Covid-19 Vaccine****{ASK ALL}****C19VaccQInt**

"The next set of questions will ask you about your views on <b>a vaccine for COVID-19</b>."

## DISPLAY

**{ASK ALL}****C19VaccOff**

"Have you been offered a vaccine for COVID-19?"

1. Yes
2. No

**{IF C19VaccOff = 1}**

**C19VaccAcc1**

“And have you had that vaccine?”

{WEB: “Please select ‘Yes’ if you have only had one of multiple doses”}

INTERVIEWER: “Please include if you have only had one of multiple doses”

1. Yes
2. No

{IF C19VaccAcc1 = 2}

**C19VaccInt**

“And do you intend to have that vaccine?”

\_WEB: “Please select one answer on every row”

\_TEL: “INTERVIEWER: READ OUT EACH STATEMENT AND THE ANSWER CODES. REPEAT ANSWER CODES AS REQUIRED.”

1. Yes
2. No
3. Not sure

{IF C19VaccOff <> 1}

**C19VaccAcc2**

Would you accept the vaccine for yourself if it is offered to you?

\_WEB: “Please select one answer on every row”

\_TEL: “INTERVIEWER: READ OUT EACH STATEMENT AND THE ANSWER CODES. REPEAT ANSWER CODES AS REQUIRED.”

1. Yes
2. No
3. Not sure

{IF C19VaccAcc2 = 3 or -8}

**C19VaccAcc3**

“Thank you for your response.

<b>We would really like to know your opinion on this, even if you are unsure or don’t feel you know enough.</b>

If you had to choose, if a COVID-19 vaccine became publicly available and you were offered it, would you accept the vaccine for yourself?

\_WEB: “Please select one answer on every row”

\_TEL: “INTERVIEWER: READ OUT EACH STATEMENT AND THE ANSWER CODES. REPEAT ANSWER CODES AS REQUIRED.”

1. Yes
2. No
3. I’m really not sure

{IF C19VaccInt = 2,3, -8 OR C19VaccAcc2 = 2 OR C19VaccAcc3 = 2,3, -8}

**C19VaccWhyNo [MULTICODE: RANDOMISE 1...12]**

For which, if any, of the following reasons {IF C19VaccInt = 2: “did you not”; IF C19VaccAcc2 = 2 OR C19VaccAcc3 = 2: “would you not”; IF C19VaccAcc3 = 3 or -8 or C19VaccInt = 3 or -8: “are you unsure if you would”} accept a vaccine for COVID-19?

\_WEB: “Please select all that apply”

\_TEL: “INTERVIEWER: READ OUT EACH OPTION AND CODE ALL THAT APPLY”

1. I don’t think COVID-19 is severe enough

2. I am concerned that vaccines are being rushed in
3. I am concerned that the vaccines have not been properly tested
4. I am frightened of needles
5. I don't feel that I have enough information about the vaccines
6. I don't think that the vaccines would be effective
7. I am worried about ingredients in the vaccines
8. I am worried that I would have a bad reaction or be allergic to it
9. I don't trust the motives of those involved in developing COVID-19 vaccines (governments, pharmaceutical companies etc.).
10. I do not believe in vaccines
11. I feel I don't need a vaccine
12. It would be inconvenient for me to get vaccinated
13. Other reason (Please describe)
14. None of these (EXCLUSIVE]

{ASK ALL}

C19VaccDec [GRID; FLIP SCALE 1...5; RANDOMISE ROWS]

How much {IF C19VaccOff = 1: "did"; IF C19VaccOff <> 1: "would"} your decision to get a COVID-19 vaccine depend on each of the following?

\_WEB: "Please select one answer on every row"

\_TEL: "INTERVIEWER: READ OUT EACH STATEMENT AND THE ANSWER CODES. REPEAT ANSWER CODES AS REQUIRED."

#### GRID ROWS

1. The country in which the vaccine is developed
2. Whether or not the vaccine is recommended by my GP/healthcare professional
3. Whether or not the vaccine is recommended by the NHS
4. Whether or not the vaccine has been tested in large trials
5. Whether or not the vaccine has been in use for a few months with no serious side-effects
6. Whether or not people I know had already had the vaccine
7. Whether or not my GP/healthcare professional had already had the vaccine
8. Whether or not my local faith leader had recommended it
9. How easy or difficult it is to get the vaccine
10. Whether or not more than one injection was needed to provide adequate protection
11. Whether or not it would allow me to get my life back (be able to go out socialising, get back to work etc)
12. Whether or not it would help to protect members of my family who are vulnerable to COVID-19

#### GRID COLS

1. Completely
2. A great deal
3. Somewhat
4. Very little
5. Not at all

{ASK ALL}

C19VaccAccFF [FLIP SCALE 1...5]

"Thinking about your family and friends, how many do you think would get vaccinated against COVID-19 if a vaccine was offered to them?"

\_WEB: "Please select one answer on every row"

\_TEL: "INTERVIEWER: READ OUT EACH STATEMENT AND THE ANSWER CODES. REPEAT ANSWER CODES AS REQUIRED."

1. All of them
2. Most of them
3. About half of them
4. Some of them
5. None of them
6. Not applicable

1  
2  
3  
4 {ASK ALL}

5 C19VaccSupFF [FLIP SCALE 1...5]

6 "To what extent do you think your family and friends support or oppose you getting vaccinated against COVID-19?"

7  
8 \_WEB: "Please select one answer on every row"

9 \_TEL: "INTERVIEWER: READ OUT EACH STATEMENT AND THE ANSWER CODES. REPEAT ANSWER  
10 CODES AS REQUIRED."

- 11  
12 1. Strongly oppose  
13 2. Oppose  
14 3. Neither oppose nor support  
15 4. Support  
16 5. Strongly support  
17 6. Not applicable

18  
19 {ASK ALL}

20 C19VaccTrstInf [GRID; FLIP SCALE; RANDOMISE ROWS]

21 "Thinking about {IF C19VaccOff = 1: "when"; IF C19VaccOff <> 1: "if"} you had to make a decision on whether or not  
22 to get a COVID-19 vaccine...

23  
24 To what extent, if at all, would you trust information about a COVID-19 vaccine from each of the following sources?

25  
26 \_WEB: "Please select one answer on every row"

27 \_TEL: "INTERVIEWER: READ OUT EACH STATEMENT AND THE ANSWER CODES. REPEAT ANSWER  
28 CODES AS REQUIRED."

29 GRID ROWS

- 30 1. Doctors, nurses, or other healthcare professionals  
31 2. Pharmacists  
32 3. The NHS  
33 4. Drug companies who manufacture vaccines  
34 5. The UK Government  
35 6. {IF Cur\_Country = 2: "The Scottish government"; IF Cur\_Country = 3: "The Welsh Assembly"}  
36 7. Scientific and medical advisers  
37 8. The World Health Organisation (WHO)  
38 9. The media (e.g. newspapers, magazines, television, radio)  
39 10. Social media (e.g. Twitter, Facebook, Instagram etc)  
40 11. Celebrities and social media influencers  
41 12. Family and friends  
42 13. Faith or community leaders

43  
44 GRID COLS

- 45 1. Completely  
46 2. A great deal  
47 3. Somewhat  
48 4. Very little  
49 5. Not at all

50  
51 {ASK ALL}

52 C19VaccPriAccep [GRID; FLIP SCALE; RANDOMISE ROWS]

53 A COVID-19 vaccine will be offered to some groups of people before other groups, and it is possible that not everyone  
54 in the population will be offered a COVID-19 vaccine.

55 How acceptable or unacceptable do you think each of the following are?

56  
57 \_WEB: "Please select one answer on every row"

58 \_TEL: "INTERVIEWER: READ OUT EACH STATEMENT AND THE ANSWER CODES. REPEAT ANSWER  
59 CODES AS REQUIRED."



## GRID ROWS

1. Some people being offered a COVID-19 vaccine before others
2. Some people not being offered a COVID-19 vaccine at all

## GRID COLS

1. Very acceptable
2. Somewhat acceptable
3. Neither acceptable nor unacceptable
4. Somewhat unacceptable
5. Very unacceptable

**{ASK ALL}****C19VaccPri [GRID; FLIP SCALE 1...5; RANDOMISE ROWS]**

“{WEB: “Below are”; TEL: “I will now read out”} some groups that some people say should be the first to be offered a COVID-19 vaccine. For each one, how high a priority do you think it is that they get a COVID-19 vaccine, or do you not think they should be offered the vaccine at all?”

Please answer on a scale of 1 to 5 where 1 means you think they should be one of the first groups to be offered the vaccine, and 5 means you think they should be one of the last groups to be offered the vaccine.

\_WEB: “Please select one answer on every row”

\_TEL: “INTERVIEWER: READ OUT EACH STATEMENT AND THE ANSWER CODES. REPEAT ANSWER CODES AS REQUIRED.”

## GRID ROWS

1. Doctors, nurses, and other healthcare professionals
2. People aged 18 to 30
3. Social care workers
4. People aged under 18
5. People with serious health conditions which mean they are vulnerable to COVID-19
6. Residents in a care home
7. Care home workers
8. People aged 80 or over
9. People aged 31-50
10. People with jobs that involve direct contact with members of the public
11. Schoolteachers

## GRID COLS

1. 1 – One of the first
2. 2
3. 3
4. 4
5. 5 – One of the last
6. They should not be offered a vaccine

**{ASK ALL}****C19VaccDoseImp [FLIP SCALE 1...4]**

“How important, if at all, do you think it is for people to get the second injection of the COVID-19 vaccine?”

\_WEB: “Please select one answer on every row”

\_TEL: “INTERVIEWER: READ OUT EACH STATEMENT AND THE ANSWER CODES. REPEAT ANSWER CODES AS REQUIRED.”

1. Very important
2. Fairly important
3. Not very important
4. Not at all important

**Covid-19 attitudes****{ASK ALL}**

**C19VaccAttQInt**

“The next set of questions will ask you about your views and experiences of COVID-19.

Some people may find these questions sensitive. Remember, you do not have to answer any questions you would prefer not to.”

DISPLAY

{ASK ALL}

**C19InfoEas [GRID; FLIP SCALE 1...5; RANDOMISE ROWS]**

“How easy or difficult do you find each of the following?”

\_WEB: “Please select one answer on every row”

\_TEL: “INTERVIEWER: READ OUT EACH STATEMENT AND THE ANSWER CODES. REPEAT ANSWER CODES AS REQUIRED.”

GRID ROWS

1. Finding information to help you make decisions about your health
2. Finding information about how to protect yourself and others from COVID-19
3. Finding information on what to do if you have symptoms of COVID-19
4. Understanding the current instructions and guidance on how to protect yourself and others from COVID-19

GRID COLS

1. Very easy
2. Fairly easy
3. Neither easy nor difficult
4. Fairly difficult
5. Very difficult
6. Not applicable

{ASK ALL}

**C19Diag**

“Have you been officially diagnosed with the coronavirus (COVID-19)?”

1. Yes
2. No
3. Don't know

{IF C19Diag <> 1}

**C19Had [FLIP SCALE 1...4]**

“Do you think you have ever had the coronavirus (COVID-19)?”

1. Yes – definitely
2. Yes - probably
3. No – probably not
4. No – definitely not
5. Don't know

{ASK ALL}

**C19Symp**

“Since January 2020, have you had coronavirus (COVID-19) symptoms?”

Symptoms can include a high temperature, a new continuous cough, or a loss of sense of smell or taste”

1. Yes
2. No
3. Don't know

{IF C19Symp = 1}

**C19SympSev [FLIP SCALE]**

“Would you say your symptoms were mild or severe?”

1. Mild
2. Severe

{ASK ALL}

**C19Oth**

“Do you have any friends or family who have had the coronavirus (COVID-19)?”

1. Yes
2. No

{IF C19Oth = 1}

**C19OthHosp**

“Have any of your friends or family had to go to hospital as a result of having the coronavirus (COVID-19)?”

1. Yes
2. No
3. Prefer not to say

{IF C19Oth = 1}

**C19OthDied**

“Have any of your friends or family died as a result of having the coronavirus (COVID-19)?”

1. Yes
2. No
3. Prefer not to say

{ASK ALL}

**C19Imp [FLIP SCALE]**

“Thinking about the impact the COVID-19 pandemic has had on different areas of your life...

How much of a negative impact, if any, would you say the COVID-19 pandemic has had on your life?”

\_WEB: “Please select one answer on every row”

\_TEL: “INTERVIEWER: READ OUT EACH STATEMENT AND THE ANSWER CODES. REPEAT ANSWER CODES AS REQUIRED.”

1. An extremely negative impact
2. A very negative impact
3. A somewhat negative impact
4. A slightly negative impact
5. It has not had a negative impact

{ASK ALL}

**C19Fut1 [FLIP SCALE 1-5]**

“How likely or unlikely do you think you are to get COVID-19 in the next 6 months?”

\_WEB: “Please select one answer on every row”

\_TEL: “INTERVIEWER: READ OUT EACH STATEMENT AND THE ANSWER CODES. REPEAT ANSWER CODES AS REQUIRED.”

1. Very likely
2. Quite likely
3. Neither likely nor unlikely
4. Quite unlikely
5. Very unlikely
6. Don't know

1  
2  
3  
4 {ASK IF C19Fut = 6}  
5 C19Fut1DK [FLIP SCALE 1-5]

6 Thank you for your response.

7  
8 <b>We would really like to know your opinion on this, even if you are unsure or don't feel you have enough  
9 information.</b>

10 If you had to decide, how likely or unlikely do you think you are to get COVID-19 in the next 6 months?

11  
12 \_WEB: "Please select one answer on every row"

13  
14 \_TEL: "INTERVIEWER: READ OUT EACH STATEMENT AND THE ANSWER CODES. REPEAT ANSWER  
15 CODES AS REQUIRED."

- 16  
17 1. Very likely  
18 2. Quite likely  
19 3. Neither likely nor unlikely  
20 4. Quite unlikely  
21 5. Very unlikely  
22 6. I really don't know

23 {ASK ALL}  
24 C19Fut2 [FLIP SCALE 1-5]

25 If you did get COVID-19 in the next 6 months, how likely or unlikely do you think you would be to become seriously ill  
26 as a result of it?

27  
28 \_WEB: "Please select one answer on every row"

29  
30 \_TEL: "INTERVIEWER: READ OUT EACH STATEMENT AND THE ANSWER CODES. REPEAT ANSWER  
31 CODES AS REQUIRED."

- 32  
33 1. Very likely  
34 2. Quite likely  
35 3. Neither likely nor unlikely  
36 4. Quite unlikely  
37 5. Very unlikely  
38 6. Don't know

39 {ASK IF C19Fut2=6}  
40 C19Fut2DK [FLIP SCALE 1-5]

41 Thank you for your response.

42  
43 <b>We would really like to know your opinion on this, even if you are unsure or don't feel you have enough  
44 information.</b>

45 If you had to decide, if you did get COVID-19 in the next 6 months, how likely or unlikely do you think you would be to  
46 become seriously ill as a result of it?

47  
48 \_WEB: "Please select one answer on every row"

49  
50 \_TEL: "INTERVIEWER: READ OUT EACH STATEMENT AND THE ANSWER CODES. REPEAT ANSWER  
51 CODES AS REQUIRED."

- 52  
53 1. Very likely  
54 2. Quite likely  
55 3. Neither likely nor unlikely  
56 4. Quite unlikely  
57 5. Very unlikely  
58 6. I really don't know

59 {ASK ALL}  
60

**C19PrvDon [GRID: RANDOMISE ROWS; FLIP SCALE 1...5]**

“How often do you currently do each of the following to help prevent the spread of COVID-19?”

\_WEB: “Please select one answer on every row”

\_TEL: “INTERVIEWER: READ OUT EACH STATEMENT AND THE ANSWER CODES. REPEAT ANSWER CODES AS REQUIRED.”

**GRID ROWS**

1. Try to stay physically distant from other people when I am out in public
2. Avoid crowded public places
3. Wash my hands with soap and water for at least 20 seconds
4. Wear a face covering whenever in shops or on public transport
5. Obey the rules about how many people from different households can meet indoors
6. Obey the rules about how many people from different households can meet outdoors
7. Register my contact details when I visit cafes, restaurants or bars

**GRID COLS**

1. Always
2. Often
3. Sometimes
4. Rarely
5. Never
6. Not applicable

{ASK ALL}

**C19Att [GRID: RANDOMISE ROWS; FLIP SCALE]**

To what extent do you agree or disagree with each of the following statements about COVID-19?

\_WEB: “Please select one answer on every row”

\_TEL: “INTERVIEWER: READ OUT EACH STATEMENT AND THE ANSWER CODES. REPEAT ANSWER CODES AS REQUIRED.”

**GRID ROWS**

1. Thinking about COVID-19 makes me feel worried
2. I am worried that I or people I care about will get sick from COVID-19
3. In general, the seriousness of COVID-19 is being exaggerated
4. COVID-19 feels like something far away from me
5. The {IF Cur\_Country = -1,1: “UK”; IF Cur\_Country = 2: “Scottish”; IF Cur\_Country = 3: “Welsh Assembly”} Government’s response to COVID-19 is doing more harm than the disease itself
6. COVID-19 is a hoax

**GRID COLS**

1. Strongly agree
2. Agree
3. Neither agree nor disagree
4. Disagree
5. Strongly disagree

{ASK ALL}

**C19Acc [GRID: RANDOMISE ROWS; FLIP SCALE]**

“How acceptable or unacceptable do you find each of the following options for addressing COVID-19 in the next 12 months?”

\_WEB: “Please select one answer on every row”

\_TEL: “INTERVIEWER: READ OUT EACH STATEMENT AND THE ANSWER CODES. REPEAT ANSWER CODES AS REQUIRED.”

**GRID ROWS**

1. Encouraging the general public to get vaccinated against COVID-19
2. Bringing in restrictions from time to time to stop the spread of COVID-19

3. Using test and trace systems to control the spread of COVID-19
4. Letting COVID-19 run its course through the population
5. Modifying our behaviour to live with COVID-19
6. Shielding of vulnerable people and letting everyone else get on with their lives

#### GRID COLS

1. Very acceptable
2. Somewhat acceptable
3. Neither acceptable nor unacceptable
4. Somewhat unacceptable
5. Very unacceptable

For peer review only

**Table S1 Overall response rate calculation accounting for recruitment onto original panel and panel attrition.**

|                                                            | Wave of British Social Attitudes Survey (BSA) from which panel was recruited |            |            |                    |
|------------------------------------------------------------|------------------------------------------------------------------------------|------------|------------|--------------------|
|                                                            | 2018                                                                         | 2019       | 2020       | Total 2018 to 2020 |
| <b>Response to initial BSA survey</b>                      |                                                                              |            |            |                    |
| BSA issued                                                 | 10,270                                                                       | 7,956      | 42066      | 60,292             |
| BSA deadwood                                               | 1,023                                                                        | 684        | 4207       | 5,914              |
| BSA productive                                             | 3,879                                                                        | 3,224      | 3964       | 11,067             |
| BSA response rate                                          | 42%                                                                          | 44%        | 10%        | 20%                |
| <b>Overall response for panel recruitment</b>              |                                                                              |            |            |                    |
| BSA productive                                             | 3,879                                                                        | 3,224      | 3964       | 11,067             |
| Recruited to panel                                         | 2,412                                                                        | 2,104      | 3086       | 7,602              |
| Panel recruitment rate                                     | 62%                                                                          | 65%        | 78%        | 69%                |
| Panel deadwood                                             | 19                                                                           | 7          | 0          | 26                 |
| Panel lost to attrition/inactivity prior to vaccine survey | 969                                                                          | 673        | 3          | 1645               |
| <b>Panel's response to vaccine survey</b>                  |                                                                              |            |            |                    |
| Issued                                                     | 1,424                                                                        | 1,424      | 3,083      | 5,931              |
| Deadwood                                                   | 1                                                                            | 5          | 0          | 6                  |
| Achieved                                                   | 1,242                                                                        | 1,181      | 2,555      | 4,978              |
| <b>Vaccine survey response rate</b>                        | <b>87%</b>                                                                   | <b>83%</b> | <b>83%</b> | <b>84%</b>         |
| <b>Overall survey response rate<sup>a</sup></b>            | <b>13%</b>                                                                   | <b>16%</b> | <b>7%</b>  | <b>9%</b>          |

<sup>a</sup> Response rate accounting for non-response at original point of recruitment (British Social Attitudes Survey 2018, 2019 or 2020; <http://bsa.natcen.ac.uk>) and panel attrition thereafter.

## Methods S2: Non-response weights

Non-response to NatCen's probability panel surveys can occur at any one of three stages: the survey used for recruitment to the panel (the British Social Attitudes survey), the invitation to join the panel (at the end of the BSA interview) and the survey of panel members itself. The BSA survey is already weighted to adjust for non-response and we compute further weights to take account of non-response at each of the two subsequent stages. The final weights are the product of these three weights. This three-stage approach is ideal because the correlates of non-response can be different at each stage. With this system we also can optimise the use of the data available from the British Social Attitudes Survey (BSA).

These are the three weights we have computed:

1. **BSA survey weight:** the panel members were recruited from BSA 2018, 2019 and 2020. The weighting process for BSA 2020 was a little different from the other years due to the change in methodology due to the COVID-19 pandemic (using a 'push-to-web' methodology, with up to two participants in a household allowed to take part). All three years required weights to adjust for differential selection probabilities (design weights), non-response at household level (non-response weights) and weights to adjust the profile of respondents to match population estimates (calibration weights). We now describe in more detail the approaches used in 2018/19 and 2020.

For 2018/2019, a non-response model was estimated to adjust for household level non-response. The model included region, dwelling type, percentage of owner-occupied properties in the postcode sector (grouped) and population density. The model produced a non-response weight, which was combined with the design weights (which accounted for unequal selection probabilities of households and individuals within households) to produce a composite weight. This weight was then adjusted using calibration weighting so that the profile of BSA respondents matches the British population in terms of age, sex and region.<sup>a</sup>

As above, the weighting process for BSA 2020 was a little different from previous years due to the methodology used. Two non-response models were created: one to adjust for household level non-response (as in previous years), and another to account for differential response within households. The first model included (grouped) census variables measuring percentage of owner occupied properties, percentage of adults with a degree and percentage of BAME individuals in the postcode sector, plus region and the geo-demographic Output Area Classification. The second model included region, household tenure, household income (grouped), number of eligible adults and IMD tertiles. Each model produced a non-response weight and these were combined to produce a composite weight. This weight was then adjusted using calibration weighting so that the profile of BSA respondents matches the GB population in terms of age, gender, highest educational qualification, tenure and region.

2. **Panel weight:** this weight accounts for non-response at the panel recruitment stage where some people interviewed as part of the BSA survey chose not to join the panel. A logistic regression model has been used to derive the probability of response of each panel member; the panel weight is computed as the inverse of the probabilities of response. This weight adjusts the panel for non-response using the following variables: age and sex groups, region, BSA year, household type, household income, education level, internet access, ethnicity, tenure, social class group, economic activity, political party identification, and interest in politics.<sup>b,c</sup> The resulting panel weight has been multiplied by the BSA weights, so the panel is representative of the population.
3. **Survey weight:** this weight is to adjust the bias caused by non-response to this particular panel survey. A logistic regression model has been used to compute the probabilities of response of each participant. The panel survey weight is equal to the inverse of the probabilities of response. The initial set of predictors used to build the model was the same as for the panel weight; and at this wave the final set of variables used was also the same. Unlike the model used to calculate the panel weight, no interaction term between BSA survey year and internet access was used. As this wave of data collection was web-only, there were only a very small number of panellists (from each year of BSA) who took part in the survey but did not have access to the internet when they were interviewed for BSA. It was therefore deemed inappropriate to include the interaction term in the model.

The final survey weight is the result of multiplying the survey weight by the compounded panel weight.

### Notes:

a. More details on the BSA weight can be found at <http://bsa.natcen.ac.uk/>

b. The characteristics that are likely to change with time for an individual and whose distribution differed between 2018 and 2020 BSA sample have been entered into the model in interaction with BSA year.

c. More details about these variables, the question wording and the full dataset can be found at <http://bsa.natcen.ac.uk/>



**Table S2 Doctors, nurses or other healthcare professionals – Association between trust in sources of information about COVID-19 vaccine and socio-demographic variables – (a) bivariate results and (b) multivariate logistic regression.**

|                                             | (a) Bivariate associations between socio-demographics and trusting COVID-19 vaccine info from Doctors, nurses or other healthcare professionals |      |               |       | (b) Logistic regression of trust in COVID-19 vaccine info from Doctors, nurses or other healthcare professionals |      |                                                                                                                                                                                                                                                |              |       |
|---------------------------------------------|-------------------------------------------------------------------------------------------------------------------------------------------------|------|---------------|-------|------------------------------------------------------------------------------------------------------------------|------|------------------------------------------------------------------------------------------------------------------------------------------------------------------------------------------------------------------------------------------------|--------------|-------|
|                                             | % Trust completely or a great deal (weighted)<br>$\chi^2$ test for differences by demographics                                                  |      |               |       | 1 = Trust completely or a great deal (4104), 0 = Trust somewhat, very little or not at all (786)                 |      |                                                                                                                                                                                                                                                |              |       |
|                                             | n                                                                                                                                               | %    | $\chi^2$ (df) | P     | N                                                                                                                | AOR* | 95% CI Lower                                                                                                                                                                                                                                   | 95% CI Upper | P     |
| <b>Gender</b>                               |                                                                                                                                                 |      |               |       |                                                                                                                  |      |                                                                                                                                                                                                                                                |              |       |
| Male                                        | 1957                                                                                                                                            | 81.7 | 3.020 (2)     | .221  | 2097                                                                                                             | ref  |                                                                                                                                                                                                                                                |              | .526  |
| Female                                      | 2046                                                                                                                                            | 79.9 |               |       | 2784                                                                                                             | 0.92 | 0.79                                                                                                                                                                                                                                           | 1.08         | .331  |
| Other                                       | 5                                                                                                                                               | 71.4 |               |       | 9                                                                                                                | 0.59 | 0.12                                                                                                                                                                                                                                           | 2.94         | .518  |
| <b>Age</b>                                  |                                                                                                                                                 |      |               |       |                                                                                                                  |      |                                                                                                                                                                                                                                                |              |       |
| 18-29                                       | 649                                                                                                                                             | 78.8 | 53.883 (6)    | <.001 | 459                                                                                                              | ref  |                                                                                                                                                                                                                                                |              | <.001 |
| 30-39 v 18-29                               | 642                                                                                                                                             | 75.7 |               |       | 758                                                                                                              | 0.83 | 0.61                                                                                                                                                                                                                                           | 1.12         | .219  |
| 40-49 v 18-39                               | 629                                                                                                                                             | 78.4 |               |       | 835                                                                                                              | 0.96 | 0.76                                                                                                                                                                                                                                           | 1.22         | .750  |
| 50-59 v 18-49                               | 701                                                                                                                                             | 80.9 |               |       | 896                                                                                                              | 1.18 | 0.95                                                                                                                                                                                                                                           | 1.47         | .133  |
| 60-69 v 18-59                               | 599                                                                                                                                             | 84.2 |               |       | 1004                                                                                                             | 1.40 | 1.12                                                                                                                                                                                                                                           | 1.74         | .003  |
| 70-79 v 18-69                               | 582                                                                                                                                             | 89.0 |               |       | 761                                                                                                              | 1.72 | 1.32                                                                                                                                                                                                                                           | 2.24         | <.001 |
| 80+ v 18-79                                 | 181                                                                                                                                             | 83.0 |               |       | 177                                                                                                              | 1.32 | 0.83                                                                                                                                                                                                                                           | 2.11         | .240  |
| <b>Education/Highest qualification</b>      |                                                                                                                                                 |      |               |       |                                                                                                                  |      |                                                                                                                                                                                                                                                |              |       |
| No qualifications                           | 440                                                                                                                                             | 71.7 | 91.917 (4)    | <.001 | 408                                                                                                              | ref  |                                                                                                                                                                                                                                                |              | <.001 |
| Degree or equivalent and above              | 1775                                                                                                                                            | 85.7 |               |       | 2454                                                                                                             | 2.64 | 2.00                                                                                                                                                                                                                                           | 3.48         | <.001 |
| A levels / Vocational level 3 or equivalent | 906                                                                                                                                             | 80.0 |               |       | 990                                                                                                              | 1.87 | 1.39                                                                                                                                                                                                                                           | 2.51         | <.001 |
| Other qual'ns below A level / Voc level 3   | 673                                                                                                                                             | 80.5 |               |       | 783                                                                                                              | 1.70 | 1.25                                                                                                                                                                                                                                           | 2.29         | .001  |
| Other qualification                         | 210                                                                                                                                             | 69.1 |               |       | 255                                                                                                              | 0.97 | 0.67                                                                                                                                                                                                                                           | 1.40         | .872  |
| <b>Financial Status</b>                     |                                                                                                                                                 |      |               |       |                                                                                                                  |      |                                                                                                                                                                                                                                                |              |       |
| Living comfortably                          | 1121                                                                                                                                            | 87.2 | 124.251 (4)   | <.001 | 1533                                                                                                             | ref  |                                                                                                                                                                                                                                                |              | <.001 |
| Doing alright                               | 1699                                                                                                                                            | 83.7 |               |       | 1995                                                                                                             | 0.90 | 0.73                                                                                                                                                                                                                                           | 1.10         | .296  |
| Just about getting by                       | 824                                                                                                                                             | 72.9 |               |       | 959                                                                                                              | 0.61 | 0.48                                                                                                                                                                                                                                           | 0.77         | <.001 |
| Finding it quite difficult                  | 247                                                                                                                                             | 73.3 |               |       | 266                                                                                                              | 0.60 | 0.42                                                                                                                                                                                                                                           | 0.84         | .003  |
| Finding it very difficult                   | 116                                                                                                                                             | 66.7 |               |       | 137                                                                                                              | 0.51 | 0.33                                                                                                                                                                                                                                           | 0.78         | .002  |
| <b>Country</b>                              |                                                                                                                                                 |      |               |       |                                                                                                                  |      |                                                                                                                                                                                                                                                |              |       |
| England                                     | 3499                                                                                                                                            | 81.7 | 21.523 (2)    | <.001 | 4299                                                                                                             | ref  |                                                                                                                                                                                                                                                |              | .128  |
| Scotland                                    | 321                                                                                                                                             | 73.0 |               |       | 383                                                                                                              | 0.77 | 0.59                                                                                                                                                                                                                                           | 1.02         | .068  |
| Wales                                       | 183                                                                                                                                             | 77.2 |               |       | 208                                                                                                              | 0.82 | 0.56                                                                                                                                                                                                                                           | 1.20         | .308  |
| <b>Urban/rural</b>                          |                                                                                                                                                 |      |               |       |                                                                                                                  |      |                                                                                                                                                                                                                                                |              |       |
| Urban                                       | 3201                                                                                                                                            | 80.1 | 4.443 (1)     | .035  | 3725                                                                                                             | ref  |                                                                                                                                                                                                                                                |              |       |
| Rural                                       | 802                                                                                                                                             | 83.1 |               |       | 1165                                                                                                             | 0.97 | 0.80                                                                                                                                                                                                                                           | 1.18         | .778  |
| <b>Ethnicity</b>                            |                                                                                                                                                 |      |               |       |                                                                                                                  |      |                                                                                                                                                                                                                                                |              |       |
| White British                               | 3314                                                                                                                                            | 83.0 | 63.871 (5)    | <.001 | 4224                                                                                                             | ref  |                                                                                                                                                                                                                                                |              | <.001 |
| Any other white background                  | 242                                                                                                                                             | 72.7 |               |       | 317                                                                                                              | 0.54 | 0.41                                                                                                                                                                                                                                           | 0.72         | <.001 |
| Mixed or multiple ethnic groups             | 64                                                                                                                                              | 66.0 |               |       | 62                                                                                                               | 0.38 | 0.22                                                                                                                                                                                                                                           | 0.67         | <.001 |
| Asian or Asian British                      | 223                                                                                                                                             | 73.4 |               |       | 160                                                                                                              | 0.53 | 0.36                                                                                                                                                                                                                                           | 0.77         | <.001 |
| Black or Black British                      | 70                                                                                                                                              | 69.3 |               |       | 67                                                                                                               | 0.41 | 0.24                                                                                                                                                                                                                                           | 0.70         | .001  |
| Other                                       | 58                                                                                                                                              | 71.6 |               |       | 60                                                                                                               | 0.56 | 0.30                                                                                                                                                                                                                                           | 1.03         | .060  |
|                                             |                                                                                                                                                 |      |               |       |                                                                                                                  |      | Hosmer & Lemeshow $\chi^2= 10.236$ , df=8, p=0.249.<br>Final model $\chi^2=220.263$ , df=24, p<.001<br>Nagelkerke = 0.075<br>Cases correctly classified: 84.0%.<br>88 cases excluded due to missing data on one or more independent variables. |              |       |

\* adjusted for all other variables in the model, AOR, adjusted odds ratio; ref, reference category; 95% CI, 95% confidence interval.

**Table S3 Pharmacists – Association between trust in sources of information about COVID-19 vaccine and socio-demographic variables – (a) bivariate results and (b) multivariate logistic regression.**

|                                             | (a) Bivariate associations between socio-demographics and trusting COVID-19 vaccine info from Pharmacists<br>% Trust completely or a great deal (weighted)<br>$\chi^2$ test for differences by demographics |      |                    |       | (b) Logistic regression of trust in COVID-19 vaccine info from Pharmacists<br>1 = Trust completely or a great deal (3107), 0 = Trust somewhat, very little or not at all (1786)                                                                |      |              |              |       |
|---------------------------------------------|-------------------------------------------------------------------------------------------------------------------------------------------------------------------------------------------------------------|------|--------------------|-------|------------------------------------------------------------------------------------------------------------------------------------------------------------------------------------------------------------------------------------------------|------|--------------|--------------|-------|
|                                             | n                                                                                                                                                                                                           | %    | $\chi^2$ (df)      | P     | N                                                                                                                                                                                                                                              | AOR* | 95% CI Lower | 95% CI Upper | P     |
| <b>Gender</b>                               |                                                                                                                                                                                                             |      |                    |       |                                                                                                                                                                                                                                                |      |              |              |       |
| Male                                        | 1420                                                                                                                                                                                                        | 59.2 | 1.597 <sup>#</sup> | .474  | 2098                                                                                                                                                                                                                                           | ref  |              |              | .620  |
| Female                                      | 1548                                                                                                                                                                                                        | 60.4 |                    |       | 2786                                                                                                                                                                                                                                           | 1.06 | 0.94         | 1.19         | .376  |
| Other                                       | 3                                                                                                                                                                                                           | 42.9 |                    |       | 9                                                                                                                                                                                                                                              | 0.78 | 0.21         | 2.95         | .715  |
| <b>Age</b>                                  |                                                                                                                                                                                                             |      |                    |       |                                                                                                                                                                                                                                                |      |              |              |       |
| 18-29                                       | 461                                                                                                                                                                                                         | 55.9 | 29.783 (6)         | <.001 | 459                                                                                                                                                                                                                                            | ref  |              |              | .092  |
| 30-39 v 18-29                               | 486                                                                                                                                                                                                         | 57.2 |                    |       | 759                                                                                                                                                                                                                                            | 0.98 | 0.77         | 1.24         | .848  |
| 40-49 v 18-39                               | 455                                                                                                                                                                                                         | 56.7 |                    |       | 835                                                                                                                                                                                                                                            | 0.96 | 0.80         | 1.16         | .662  |
| 50-59 v 18-49                               | 518                                                                                                                                                                                                         | 59.7 |                    |       | 896                                                                                                                                                                                                                                            | 1.18 | 0.99         | 1.39         | .062  |
| 60-69 v 18-59                               | 462                                                                                                                                                                                                         | 65.0 |                    |       | 1004                                                                                                                                                                                                                                           | 1.24 | 1.06         | 1.46         | .009  |
| 70-79 v 18-69                               | 428                                                                                                                                                                                                         | 65.1 |                    |       | 763                                                                                                                                                                                                                                            | 1.00 | 0.84         | 1.19         | .972  |
| 80+ v 18-79                                 | 144                                                                                                                                                                                                         | 65.8 |                    |       | 177                                                                                                                                                                                                                                            | 1.12 | 0.80         | 1.55         | .514  |
| <b>Education/Highest qualification</b>      |                                                                                                                                                                                                             |      |                    |       |                                                                                                                                                                                                                                                |      |              |              |       |
| No qualifications                           | 349                                                                                                                                                                                                         | 56.7 | 25.123 (4)         | <.001 | 410                                                                                                                                                                                                                                            | ref  |              |              | <.001 |
| Degree or equivalent and above              | 1305                                                                                                                                                                                                        | 63.0 |                    |       | 2454                                                                                                                                                                                                                                           | 1.34 | 1.07         | 1.67         | .012  |
| A levels / Vocational level 3 or equivalent | 680                                                                                                                                                                                                         | 60.1 |                    |       | 990                                                                                                                                                                                                                                            | 1.20 | 0.94         | 1.53         | .146  |
| Other qual'ns below A level / Voc level 3   | 485                                                                                                                                                                                                         | 57.9 |                    |       | 784                                                                                                                                                                                                                                            | 1.02 | 0.79         | 1.31         | .890  |
| Other qualification                         | 151                                                                                                                                                                                                         | 49.8 |                    |       | 255                                                                                                                                                                                                                                            | 0.82 | 0.59         | 1.13         | .216  |
| <b>Financial Status</b>                     |                                                                                                                                                                                                             |      |                    |       |                                                                                                                                                                                                                                                |      |              |              |       |
| Living comfortably                          | 883                                                                                                                                                                                                         | 68.7 | 78.993 (4)         | <.001 | 1533                                                                                                                                                                                                                                           | ref  |              |              | <.001 |
| Doing alright                               | 1220                                                                                                                                                                                                        | 60.0 |                    |       | 1997                                                                                                                                                                                                                                           | 0.77 | 0.66         | 0.89         | <.001 |
| Just about getting by                       | 607                                                                                                                                                                                                         | 53.6 |                    |       | 960                                                                                                                                                                                                                                            | 0.63 | 0.53         | 0.75         | <.001 |
| Finding it quite difficult                  | 178                                                                                                                                                                                                         | 52.8 |                    |       | 266                                                                                                                                                                                                                                            | 0.62 | 0.47         | 0.82         | .001  |
| Finding it very difficult                   | 81                                                                                                                                                                                                          | 46.8 |                    |       | 137                                                                                                                                                                                                                                            | 0.51 | 0.35         | 0.73         | <.001 |
| <b>Country</b>                              |                                                                                                                                                                                                             |      |                    |       |                                                                                                                                                                                                                                                |      |              |              |       |
| England                                     | 2589                                                                                                                                                                                                        | 60.4 | 7.095 (2)          | .029  | 4301                                                                                                                                                                                                                                           | ref  |              |              | .673  |
| Scotland                                    | 239                                                                                                                                                                                                         | 54.1 |                    |       | 384                                                                                                                                                                                                                                            | 0.91 | 0.73         | 1.13         | .403  |
| Wales                                       | 137                                                                                                                                                                                                         | 57.8 |                    |       | 208                                                                                                                                                                                                                                            | 0.95 | 0.71         | 1.27         | .721  |
| <b>Urban/rural</b>                          |                                                                                                                                                                                                             |      |                    |       |                                                                                                                                                                                                                                                |      |              |              |       |
| Urban                                       | 2349                                                                                                                                                                                                        | 58.7 | 8.096 (1)          | .004  | 3728                                                                                                                                                                                                                                           |      |              |              |       |
| Rural                                       | 615                                                                                                                                                                                                         | 63.7 |                    |       | 1165                                                                                                                                                                                                                                           | 1.04 | 0.90         | 1.20         | .599  |
| <b>Ethnicity</b>                            |                                                                                                                                                                                                             |      |                    |       |                                                                                                                                                                                                                                                |      |              |              |       |
| White British                               | 2516                                                                                                                                                                                                        | 62.9 | 91.005 (5)         | <.001 | 4226                                                                                                                                                                                                                                           | ref  |              |              | <.001 |
| Any other white background                  | 157                                                                                                                                                                                                         | 46.7 |                    |       | 318                                                                                                                                                                                                                                            | 0.57 | 0.45         | 0.72         | <.001 |
| Mixed or multiple ethnic groups             | 39                                                                                                                                                                                                          | 40.2 |                    |       | 62                                                                                                                                                                                                                                             | 0.42 | 0.25         | 0.70         | <.001 |
| Asian or Asian British                      | 142                                                                                                                                                                                                         | 46.6 |                    |       | 160                                                                                                                                                                                                                                            | 0.47 | 0.34         | 0.65         | <.001 |
| Black or Black British                      | 51                                                                                                                                                                                                          | 50.5 |                    |       | 67                                                                                                                                                                                                                                             | 0.63 | 0.39         | 1.03         | .067  |
| Other                                       | 35                                                                                                                                                                                                          | 43.2 |                    |       | 60                                                                                                                                                                                                                                             | 0.48 | 0.29         | 0.81         | .006  |
|                                             |                                                                                                                                                                                                             |      |                    |       | Hosmer & Lemeshow $\chi^2= 11.453$ , df=8, p=0.177.<br>Final model $\chi^2=157.815$ , df=24, p<0.001<br>Nagelkerke = .043<br>Cases correctly classified: 64.5%.<br>85 cases excluded due to missing data on one or more independent variables. |      |              |              |       |

\* adjusted for all other variables in the model, AOR, adjusted odds ratio; ref, reference category; 95% CI, 95% confidence interval. # Fisher-Freeman-Halton Exact Test.

**Table S4 The NHS – Association between trust in sources of information about COVID-19 vaccine and socio-demographic variables – (a) bivariate results and (b) multivariate logistic regression.**

|                                             | (a) Bivariate associations between socio-demographics and trusting COVID-19 vaccine info from the NHS<br>% Trust completely or a great deal (weighted)<br>$\chi^2$ test for differences by demographics |      |               |       | (b) Logistic regression of trust in COVID-19 vaccine info from the NHS<br>1 = Trust completely or a great deal (4115), 0 = Trust somewhat, very little or not at all (775)                                                                    |      |              |              |       |
|---------------------------------------------|---------------------------------------------------------------------------------------------------------------------------------------------------------------------------------------------------------|------|---------------|-------|-----------------------------------------------------------------------------------------------------------------------------------------------------------------------------------------------------------------------------------------------|------|--------------|--------------|-------|
|                                             | n                                                                                                                                                                                                       | %    | $\chi^2$ (df) | P     | N                                                                                                                                                                                                                                             | AOR* | 95% CI Lower | 95% CI Upper | P     |
| <b>Gender</b>                               |                                                                                                                                                                                                         |      |               |       |                                                                                                                                                                                                                                               |      |              |              |       |
| Male                                        | 1926                                                                                                                                                                                                    | 80.3 | 1.598 (2)     | .450  | 2097                                                                                                                                                                                                                                          | ref  |              |              | .461  |
| Female                                      | 2055                                                                                                                                                                                                    | 80.2 |               |       | 2784                                                                                                                                                                                                                                          | 0.97 | 0.82         | 1.14         | .718  |
| Other                                       | 5                                                                                                                                                                                                       | 62.5 |               |       | 9                                                                                                                                                                                                                                             | 0.41 | 0.10         | 1.74         | .225  |
| <b>Age</b>                                  |                                                                                                                                                                                                         |      |               |       |                                                                                                                                                                                                                                               |      |              |              |       |
| 18-29                                       | 609                                                                                                                                                                                                     | 73.9 | 106.785 (6)   | <.001 | 459                                                                                                                                                                                                                                           | ref  |              |              | <.001 |
| 30-39 v 18-29                               | 632                                                                                                                                                                                                     | 74.4 |               |       | 759                                                                                                                                                                                                                                           | 0.94 | 0.70         | 1.26         | .672  |
| 40-49 v 18-39                               | 618                                                                                                                                                                                                     | 77.1 |               |       | 834                                                                                                                                                                                                                                           | 1.05 | 0.84         | 1.32         | .672  |
| 50-59 v 18-49                               | 710                                                                                                                                                                                                     | 81.9 |               |       | 895                                                                                                                                                                                                                                           | 1.45 | 1.16         | 1.81         | .001  |
| 60-69 v 18-59                               | 609                                                                                                                                                                                                     | 85.7 |               |       | 1004                                                                                                                                                                                                                                          | 1.62 | 1.29         | 2.03         | <.001 |
| 70-79 v 18-69                               | 593                                                                                                                                                                                                     | 90.5 |               |       | 762                                                                                                                                                                                                                                           | 1.99 | 1.50         | 2.63         | <.001 |
| 80+ v 18-79                                 | 186                                                                                                                                                                                                     | 85.3 |               |       | 177                                                                                                                                                                                                                                           | 1.66 | 0.99         | 2.79         | .056  |
| <b>Education/Highest qualification</b>      |                                                                                                                                                                                                         |      |               |       |                                                                                                                                                                                                                                               |      |              |              |       |
| No qualifications                           | 447                                                                                                                                                                                                     | 72.6 | 60.407 (4)    | <.001 | 410                                                                                                                                                                                                                                           | ref  |              |              | <.001 |
| Degree or equivalent and above              | 1733                                                                                                                                                                                                    | 83.7 |               |       | 2452                                                                                                                                                                                                                                          | 2.39 | 1.80         | 3.16         | <.001 |
| A levels / Vocational level 3 or equivalent | 909                                                                                                                                                                                                     | 80.4 |               |       | 990                                                                                                                                                                                                                                           | 1.95 | 1.44         | 2.64         | <.001 |
| Other qual'ns below A level / Voc level 3   | 679                                                                                                                                                                                                     | 81.2 |               |       | 783                                                                                                                                                                                                                                           | 1.78 | 1.30         | 2.43         | <.001 |
| Other qualification                         | 211                                                                                                                                                                                                     | 69.6 |               |       | 255                                                                                                                                                                                                                                           | 0.95 | 0.65         | 1.39         | .805  |
| <b>Financial Status</b>                     |                                                                                                                                                                                                         |      |               |       |                                                                                                                                                                                                                                               |      |              |              |       |
| Living comfortably                          | 1136                                                                                                                                                                                                    | 88.3 | 167.221 (4)   | <.001 | 1533                                                                                                                                                                                                                                          | ref  |              |              | <.001 |
| Doing alright                               | 1675                                                                                                                                                                                                    | 82.4 |               |       | 1996                                                                                                                                                                                                                                          | 0.74 | 0.59         | 0.92         | .006  |
| Just about getting by                       | 823                                                                                                                                                                                                     | 72.8 |               |       | 958                                                                                                                                                                                                                                           | 0.47 | 0.37         | 0.60         | <.001 |
| Finding it quite difficult                  | 248                                                                                                                                                                                                     | 73.6 |               |       | 266                                                                                                                                                                                                                                           | 0.51 | 0.36         | 0.72         | <.001 |
| Finding it very difficult                   | 99                                                                                                                                                                                                      | 56.9 |               |       | 137                                                                                                                                                                                                                                           | 0.31 | 0.21         | 0.47         | <.001 |
| <b>Country</b>                              |                                                                                                                                                                                                         |      |               |       |                                                                                                                                                                                                                                               |      |              |              |       |
| England                                     | 3459                                                                                                                                                                                                    | 80.8 | 6.736 (2)     | .034  | 4298                                                                                                                                                                                                                                          | ref  |              |              | .505  |
| Scotland                                    | 345                                                                                                                                                                                                     | 78.1 |               |       | 384                                                                                                                                                                                                                                           | 0.98 | 0.73         | 1.32         | .900  |
| Wales                                       | 177                                                                                                                                                                                                     | 74.7 |               |       | 208                                                                                                                                                                                                                                           | 0.80 | 0.54         | 1.17         | .243  |
| <b>Urban/rural</b>                          |                                                                                                                                                                                                         |      |               |       |                                                                                                                                                                                                                                               |      |              |              |       |
| Urban                                       | 3165                                                                                                                                                                                                    | 79.2 | 14.722 (1)    | <.001 | 3725                                                                                                                                                                                                                                          |      |              |              |       |
| Rural                                       | 817                                                                                                                                                                                                     | 84.7 |               |       | 1165                                                                                                                                                                                                                                          | 1.03 | 0.84         | 1.26         | .791  |
| <b>Ethnicity</b>                            |                                                                                                                                                                                                         |      |               |       |                                                                                                                                                                                                                                               |      |              |              |       |
| White British                               | 3331                                                                                                                                                                                                    | 83.3 | 126.307 (5)   | <.001 | 4225                                                                                                                                                                                                                                          | ref  |              |              | <.001 |
| Any other white background                  | 224                                                                                                                                                                                                     | 67.3 |               |       | 317                                                                                                                                                                                                                                           | 0.47 | 0.36         | 0.63         | <.001 |
| Mixed or multiple ethnic groups             | 67                                                                                                                                                                                                      | 69.1 |               |       | 62                                                                                                                                                                                                                                            | 0.48 | 0.27         | 0.86         | .014  |
| Asian or Asian British                      | 207                                                                                                                                                                                                     | 68.1 |               |       | 160                                                                                                                                                                                                                                           | 0.57 | 0.39         | 0.84         | .004  |
| Black or Black British                      | 60                                                                                                                                                                                                      | 60.0 |               |       | 66                                                                                                                                                                                                                                            | 0.38 | 0.22         | 0.65         | <.001 |
| Other                                       | 57                                                                                                                                                                                                      | 70.4 |               |       | 60                                                                                                                                                                                                                                            | 0.45 | 0.25         | 0.81         | .008  |
|                                             |                                                                                                                                                                                                         |      |               |       | Hosmer & Lemeshow $\chi^2= 8.677$ , df=8, p=0.370.<br>Final model $\chi^2=291.002$ , df=24, p<0.001<br>Nagelkerke = .099<br>Cases correctly classified: 84.3%.<br>88 cases excluded due to missing data on one or more independent variables. |      |              |              |       |

\* adjusted for all other variables in the model, AOR, adjusted odds ratio; ref, reference category; 95% CI, 95% confidence interval.

**Table S5 Drug companies who manufacture vaccines – Association between trust in sources of information about COVID-19 vaccine and socio-demographic variables – (a) bivariate results and (b) multivariate logistic regression.**

|                                                                                                                                                                                                     | (a) Bivariate associations between socio-demographics and trusting COVID-19 vaccine info from drug companies who manufacture vaccines |      |                     |       | (b) Logistic regression of trust in COVID-19 vaccine info from drug companies who manufacture vaccines                                                                                                                                      |      |              |              |       |
|-----------------------------------------------------------------------------------------------------------------------------------------------------------------------------------------------------|---------------------------------------------------------------------------------------------------------------------------------------|------|---------------------|-------|---------------------------------------------------------------------------------------------------------------------------------------------------------------------------------------------------------------------------------------------|------|--------------|--------------|-------|
|                                                                                                                                                                                                     | n                                                                                                                                     | %    | $\chi^2$ (df)       | P     | N                                                                                                                                                                                                                                           | AOR* | 95% CI Lower | 95% CI Upper | P     |
| % Trust completely or a great deal (weighted)<br>$\chi^2$ test for differences by demographics<br>1 = Trust completely or a great deal (1416), 0 = Trust somewhat, very little or not at all (3473) |                                                                                                                                       |      |                     |       |                                                                                                                                                                                                                                             |      |              |              |       |
| <b>Gender</b>                                                                                                                                                                                       |                                                                                                                                       |      |                     |       |                                                                                                                                                                                                                                             |      |              |              |       |
| Male                                                                                                                                                                                                | 652                                                                                                                                   | 27.2 | 16.276 <sup>#</sup> | <.001 | 2096                                                                                                                                                                                                                                        | ref  |              |              | <.001 |
| Female                                                                                                                                                                                              | 819                                                                                                                                   | 32.0 |                     |       | 2784                                                                                                                                                                                                                                        | 1.28 | 1.12         | 1.45         | <.001 |
| Other                                                                                                                                                                                               | 0                                                                                                                                     | 0.0  |                     |       | 9                                                                                                                                                                                                                                           | 0.00 | 0.00         | .            | .999  |
| <b>Age</b>                                                                                                                                                                                          |                                                                                                                                       |      |                     |       |                                                                                                                                                                                                                                             |      |              |              |       |
| 18-29                                                                                                                                                                                               | 264                                                                                                                                   | 32.0 | 32.180 (6)          | <.001 | 459                                                                                                                                                                                                                                         | ref  |              |              | .030  |
| 30-39 v 18-29                                                                                                                                                                                       | 249                                                                                                                                   | 29.3 |                     |       | 759                                                                                                                                                                                                                                         | 0.91 | 0.71         | 1.18         | .480  |
| 40-49 v 18-39                                                                                                                                                                                       | 196                                                                                                                                   | 24.5 |                     |       | 834                                                                                                                                                                                                                                         | 0.72 | 0.59         | 0.89         | .002  |
| 50-59 v 18-49                                                                                                                                                                                       | 226                                                                                                                                   | 26.1 |                     |       | 896                                                                                                                                                                                                                                         | 0.87 | 0.72         | 1.04         | .120  |
| 60-69 v 18-59                                                                                                                                                                                       | 219                                                                                                                                   | 30.8 |                     |       | 1004                                                                                                                                                                                                                                        | 0.96 | 0.81         | 1.13         | .613  |
| 70-79 v 18-69                                                                                                                                                                                       | 233                                                                                                                                   | 35.6 |                     |       | 760                                                                                                                                                                                                                                         | 1.12 | 0.94         | 1.34         | .204  |
| 80+ v 18-79                                                                                                                                                                                         | 76                                                                                                                                    | 34.7 |                     |       | 177                                                                                                                                                                                                                                         | 1.02 | 0.73         | 1.42         | .905  |
| <b>Education/Highest qualification</b>                                                                                                                                                              |                                                                                                                                       |      |                     |       |                                                                                                                                                                                                                                             |      |              |              |       |
| No qualifications                                                                                                                                                                                   | 217                                                                                                                                   | 35.3 | 17.807 (4)          | .001  | 408                                                                                                                                                                                                                                         | ref  |              |              | .004  |
| Degree or equivalent and above                                                                                                                                                                      | 569                                                                                                                                   | 27.5 |                     |       | 2454                                                                                                                                                                                                                                        | 0.72 | 0.57         | 0.92         | .007  |
| A levels / Vocational level 3 or equivalent                                                                                                                                                         | 321                                                                                                                                   | 28.4 |                     |       | 990                                                                                                                                                                                                                                         | 0.78 | 0.60         | 1.01         | .057  |
| Other qual'ns below A level / Voc level 3                                                                                                                                                           | 267                                                                                                                                   | 31.9 |                     |       | 783                                                                                                                                                                                                                                         | 0.97 | 0.75         | 1.26         | .844  |
| Other qualification                                                                                                                                                                                 | 97                                                                                                                                    | 32.1 |                     |       | 254                                                                                                                                                                                                                                         | 0.94 | 0.67         | 1.32         | .732  |
| <b>Financial Status</b>                                                                                                                                                                             |                                                                                                                                       |      |                     |       |                                                                                                                                                                                                                                             |      |              |              |       |
| Living comfortably                                                                                                                                                                                  | 444                                                                                                                                   | 34.5 | 20.183 (4)          | <.001 | 1533                                                                                                                                                                                                                                        | ref  |              |              | <.001 |
| Doing alright                                                                                                                                                                                       | 565                                                                                                                                   | 27.8 |                     |       | 1995                                                                                                                                                                                                                                        | 0.72 | 0.62         | 0.83         | <.001 |
| Just about getting by                                                                                                                                                                               | 313                                                                                                                                   | 27.7 |                     |       | 958                                                                                                                                                                                                                                         | 0.66 | 0.55         | 0.80         | <.001 |
| Finding it quite difficult                                                                                                                                                                          | 98                                                                                                                                    | 29.0 |                     |       | 266                                                                                                                                                                                                                                         | 0.74 | 0.55         | 1.00         | .054  |
| Finding it very difficult                                                                                                                                                                           | 50                                                                                                                                    | 29.1 |                     |       | 137                                                                                                                                                                                                                                         | 0.55 | 0.36         | 0.85         | .007  |
| <b>Country</b>                                                                                                                                                                                      |                                                                                                                                       |      |                     |       |                                                                                                                                                                                                                                             |      |              |              |       |
| England                                                                                                                                                                                             | 1259                                                                                                                                  | 29.4 | 2.325 (2)           | .313  | 4297                                                                                                                                                                                                                                        | ref  |              |              | .842  |
| Scotland                                                                                                                                                                                            | 130                                                                                                                                   | 29.3 |                     |       | 384                                                                                                                                                                                                                                         | 1.00 | 0.79         | 1.26         | .996  |
| Wales                                                                                                                                                                                               | 81                                                                                                                                    | 34.0 |                     |       | 208                                                                                                                                                                                                                                         | 1.10 | 0.81         | 1.49         | .559  |
| <b>Urban/rural</b>                                                                                                                                                                                  |                                                                                                                                       |      |                     |       |                                                                                                                                                                                                                                             |      |              |              |       |
| Urban                                                                                                                                                                                               | 1187                                                                                                                                  | 29.7 | .092 (1)            | .762  | 3724                                                                                                                                                                                                                                        |      |              |              |       |
| Rural                                                                                                                                                                                               | 282                                                                                                                                   | 29.2 |                     |       | 1165                                                                                                                                                                                                                                        | 0.99 | 0.85         | 1.15         | .868  |
| <b>Ethnicity</b>                                                                                                                                                                                    |                                                                                                                                       |      |                     |       |                                                                                                                                                                                                                                             |      |              |              |       |
| White British                                                                                                                                                                                       | 1234                                                                                                                                  | 30.9 | 29.028 (5)          | <.001 | 4223                                                                                                                                                                                                                                        | ref  |              |              | .012  |
| Any other white background                                                                                                                                                                          | 70                                                                                                                                    | 20.9 |                     |       | 318                                                                                                                                                                                                                                         | 0.63 | 0.48         | 0.84         | .002  |
| Mixed or multiple ethnic groups                                                                                                                                                                     | 20                                                                                                                                    | 20.6 |                     |       | 62                                                                                                                                                                                                                                          | 0.92 | 0.52         | 1.62         | .769  |
| Asian or Asian British                                                                                                                                                                              | 83                                                                                                                                    | 27.2 |                     |       | 160                                                                                                                                                                                                                                         | 0.74 | 0.50         | 1.08         | .119  |
| Black or Black British                                                                                                                                                                              | 35                                                                                                                                    | 34.7 |                     |       | 67                                                                                                                                                                                                                                          | 1.11 | 0.64         | 1.91         | .714  |
| Other                                                                                                                                                                                               | 12                                                                                                                                    | 15.2 |                     |       | 59                                                                                                                                                                                                                                          | 0.55 | 0.28         | 1.07         | .078  |
|                                                                                                                                                                                                     |                                                                                                                                       |      |                     |       | Hosmer & Lemeshow $\chi^2=9.180$ , df=8, p=0.327.<br>Final model $\chi^2=96.401$ , df=24, p<0.001<br>Nagelkerke = .028<br>Cases correctly classified: 71.0%.<br>89 cases excluded due to missing data on one or more independent variables. |      |              |              |       |

\* adjusted for all other variables in the model, AOR, adjusted odds ratio; ref, reference category; 95% CI, 95% confidence interval. # Fisher-Freeman-Halton Exact Test.

**Table S6 The UK Government – Association between trust in sources of information about COVID-19 vaccine and socio-demographic variables – (a) bivariate results and (b) multivariate logistic regression.**

|                                             | (a) Bivariate associations between socio-demographics and trusting COVID-19 vaccine info from the UK Government<br>% Trust completely or a great deal (weighted)<br>$\chi^2$ test for differences by demographics |      |                     |       | (b) Logistic regression of trust in COVID-19 vaccine info from the UK Government<br>1 = Trust completely or a great deal (2279), 0 = Trust somewhat, very little or not at all (2607)                                                        |      |              |              |       |
|---------------------------------------------|-------------------------------------------------------------------------------------------------------------------------------------------------------------------------------------------------------------------|------|---------------------|-------|----------------------------------------------------------------------------------------------------------------------------------------------------------------------------------------------------------------------------------------------|------|--------------|--------------|-------|
|                                             | n                                                                                                                                                                                                                 | %    | $\chi^2$ (df)       | P     | N                                                                                                                                                                                                                                            | AOR* | 95% CI Lower | 95% CI Upper | P     |
| <b>Gender</b>                               |                                                                                                                                                                                                                   |      |                     |       |                                                                                                                                                                                                                                              |      |              |              |       |
| Male                                        | 1114                                                                                                                                                                                                              | 46.6 | 10.393 <sup>#</sup> | .005  | 2096                                                                                                                                                                                                                                         | ref  |              |              | .012  |
| Female                                      | 1080                                                                                                                                                                                                              | 42.3 |                     |       | 2781                                                                                                                                                                                                                                         | 0.84 | 0.75         | 0.95         | .004  |
| Other                                       | 2                                                                                                                                                                                                                 | 25.0 |                     |       | 9                                                                                                                                                                                                                                            | 0.47 | 0.09         | 2.37         | .363  |
| <b>Age</b>                                  |                                                                                                                                                                                                                   |      |                     |       |                                                                                                                                                                                                                                              |      |              |              |       |
| 18-29                                       | 261                                                                                                                                                                                                               | 31.9 | 182.080 (6)         | <.001 | 458                                                                                                                                                                                                                                          | ref  |              |              | <.001 |
| 30-39 v 18-29                               | 290                                                                                                                                                                                                               | 34.2 |                     |       | 758                                                                                                                                                                                                                                          | 1.14 | 0.89         | 1.47         | .289  |
| 40-49 v 18-39                               | 332                                                                                                                                                                                                               | 41.5 |                     |       | 834                                                                                                                                                                                                                                          | 1.37 | 1.14         | 1.65         | <.001 |
| 50-59 v 18-49                               | 416                                                                                                                                                                                                               | 48.0 |                     |       | 895                                                                                                                                                                                                                                          | 1.67 | 1.41         | 1.97         | <.001 |
| 60-69 v 18-59                               | 373                                                                                                                                                                                                               | 52.8 |                     |       | 1003                                                                                                                                                                                                                                         | 1.46 | 1.25         | 1.70         | <.001 |
| 70-79 v 18-69                               | 383                                                                                                                                                                                                               | 58.6 |                     |       | 762                                                                                                                                                                                                                                          | 1.65 | 1.40         | 1.96         | <.001 |
| 80+ v 18-79                                 | 124                                                                                                                                                                                                               | 57.1 |                     |       | 176                                                                                                                                                                                                                                          | 1.54 | 1.13         | 2.11         | .007  |
| <b>Education/Highest qualification</b>      |                                                                                                                                                                                                                   |      |                     |       |                                                                                                                                                                                                                                              |      |              |              |       |
| No qualifications                           | 269                                                                                                                                                                                                               | 43.7 | 2.856 (4)           | .582  | 410                                                                                                                                                                                                                                          | ref  |              |              | .439  |
| Degree or equivalent and above              | 924                                                                                                                                                                                                               | 44.8 |                     |       | 2450                                                                                                                                                                                                                                         | 0.95 | 0.76         | 1.18         | .622  |
| A levels / Vocational level 3 or equivalent | 482                                                                                                                                                                                                               | 42.6 |                     |       | 990                                                                                                                                                                                                                                          | 1.04 | 0.82         | 1.33         | .733  |
| Other qual'ns below A level / Voc level 3   | 386                                                                                                                                                                                                               | 46.2 |                     |       | 783                                                                                                                                                                                                                                          | 1.07 | 0.83         | 1.37         | .601  |
| Other qualification                         | 134                                                                                                                                                                                                               | 45.1 |                     |       | 253                                                                                                                                                                                                                                          | 1.14 | 0.83         | 1.58         | .422  |
| <b>Financial Status</b>                     |                                                                                                                                                                                                                   |      |                     |       |                                                                                                                                                                                                                                              |      |              |              |       |
| Living comfortably                          | 704                                                                                                                                                                                                               | 54.8 | 94.512 (4)          | <.001 | 1533                                                                                                                                                                                                                                         | ref  |              |              | <.001 |
| Doing alright                               | 891                                                                                                                                                                                                               | 43.9 |                     |       | 1994                                                                                                                                                                                                                                         | 0.76 | 0.66         | 0.87         | <.001 |
| Just about getting by                       | 415                                                                                                                                                                                                               | 36.9 |                     |       | 957                                                                                                                                                                                                                                          | 0.54 | 0.45         | 0.64         | <.001 |
| Finding it quite difficult                  | 124                                                                                                                                                                                                               | 36.9 |                     |       | 266                                                                                                                                                                                                                                          | 0.55 | 0.42         | 0.73         | <.001 |
| Finding it very difficult                   | 60                                                                                                                                                                                                                | 36.1 |                     |       | 136                                                                                                                                                                                                                                          | 0.40 | 0.27         | 0.59         | <.001 |
| <b>Country</b>                              |                                                                                                                                                                                                                   |      |                     |       |                                                                                                                                                                                                                                              |      |              |              |       |
| England                                     | 1928                                                                                                                                                                                                              | 45.1 | 19.887 (2)          | <.001 | 4295                                                                                                                                                                                                                                         | ref  |              |              | .003  |
| Scotland                                    | 151                                                                                                                                                                                                               | 34.5 |                     |       | 383                                                                                                                                                                                                                                          | 0.70 | 0.56         | 0.88         | .002  |
| Wales                                       | 114                                                                                                                                                                                                               | 48.3 |                     |       | 208                                                                                                                                                                                                                                          | 1.18 | 0.89         | 1.58         | .253  |
| <b>Urban/rural</b>                          |                                                                                                                                                                                                                   |      |                     |       |                                                                                                                                                                                                                                              |      |              |              |       |
| Urban                                       | 1741                                                                                                                                                                                                              | 43.8 | 2.886 (1)           | .089  | 3721                                                                                                                                                                                                                                         |      |              |              |       |
| Rural                                       | 451                                                                                                                                                                                                               | 46.8 |                     |       | 1165                                                                                                                                                                                                                                         | 1.00 | 0.87         | 1.15         | .969  |
| <b>Ethnicity</b>                            |                                                                                                                                                                                                                   |      |                     |       |                                                                                                                                                                                                                                              |      |              |              |       |
| White British                               | 1832                                                                                                                                                                                                              | 45.9 | 35.180 (5)          | <.001 | 4224                                                                                                                                                                                                                                         | ref  |              |              | .074  |
| Any other white background                  | 104                                                                                                                                                                                                               | 31.2 |                     |       | 317                                                                                                                                                                                                                                          | 0.70 | 0.55         | 0.90         | .005  |
| Mixed or multiple ethnic groups             | 31                                                                                                                                                                                                                | 32.0 |                     |       | 62                                                                                                                                                                                                                                           | 0.73 | 0.43         | 1.26         | .258  |
| Asian or Asian British                      | 126                                                                                                                                                                                                               | 42.6 |                     |       | 158                                                                                                                                                                                                                                          | 1.14 | 0.82         | 1.59         | .430  |
| Black or Black British                      | 40                                                                                                                                                                                                                | 40.0 |                     |       | 66                                                                                                                                                                                                                                           | 1.07 | 0.64         | 1.77         | .803  |
| Other                                       | 31                                                                                                                                                                                                                | 39.2 |                     |       | 59                                                                                                                                                                                                                                           | 1.03 | 0.60         | 1.76         | .910  |
|                                             |                                                                                                                                                                                                                   |      |                     |       | Hosmer & Lemeshow $\chi^2=9.412$ , df=8, p=0.309.<br>Final model $\chi^2=258.301$ , df=24, p<0.001<br>Nagelkerke = .069<br>Cases correctly classified: 60.3%.<br>92 cases excluded due to missing data on one or more independent variables. |      |              |              |       |

\* adjusted for all other variables in the model, AOR, adjusted odds ratio; ref, reference category; 95% CI, 95% confidence interval. <sup>#</sup> Fisher-Freeman-Halton Exact Test.

**Table S7 The Scottish/Welsh Government – Association between trust in sources of information about COVID-19 vaccine and socio-demographic variables – (a) bivariate results and (b) multivariate logistic regression.**

|                                             | (a) Bivariate associations between socio-demographics and trusting COVID-19 vaccine info from the Scottish/Welsh Government<br>% Trust completely or a great deal (weighted)<br>$\chi^2$ test for differences by demographics |      |               |       | (b) Logistic regression of trust in COVID-19 vaccine info from the Scottish/Welsh Government<br>1 = Trust completely or a great deal (289), 0 = Trust somewhat, very little or not at all (297)                                               |      |              |              |      |
|---------------------------------------------|-------------------------------------------------------------------------------------------------------------------------------------------------------------------------------------------------------------------------------|------|---------------|-------|-----------------------------------------------------------------------------------------------------------------------------------------------------------------------------------------------------------------------------------------------|------|--------------|--------------|------|
|                                             | n                                                                                                                                                                                                                             | %    | $\chi^2$ (df) | P     | N                                                                                                                                                                                                                                             | AOR* | 95% CI Lower | 95% CI Upper | P    |
| <b>Gender</b>                               |                                                                                                                                                                                                                               |      |               |       |                                                                                                                                                                                                                                               |      |              |              |      |
| Male                                        | 173                                                                                                                                                                                                                           | 49.0 | 3.935 (1)     | .047  | 274                                                                                                                                                                                                                                           | ref  |              |              |      |
| Female                                      | 132                                                                                                                                                                                                                           | 41.4 |               |       | 312                                                                                                                                                                                                                                           | 0.89 | 0.63         | 1.25         | .491 |
| <b>Age</b>                                  |                                                                                                                                                                                                                               |      |               |       |                                                                                                                                                                                                                                               |      |              |              |      |
| 18-29                                       | 61                                                                                                                                                                                                                            | 50.8 | 8.885 (6)     | .180  | 63                                                                                                                                                                                                                                            | ref  |              |              | .249 |
| 30-39 v 18-29                               | 45                                                                                                                                                                                                                            | 44.1 |               |       | 93                                                                                                                                                                                                                                            | 1.27 | 0.65         | 2.48         | .485 |
| 40-49 v 18-39                               | 36                                                                                                                                                                                                                            | 36.7 |               |       | 95                                                                                                                                                                                                                                            | 0.87 | 0.51         | 1.49         | .617 |
| 50-59 v 18-49                               | 75                                                                                                                                                                                                                            | 52.1 |               |       | 117                                                                                                                                                                                                                                           | 1.66 | 1.03         | 2.67         | .037 |
| 60-69 v 18-59                               | 46                                                                                                                                                                                                                            | 46.5 |               |       | 113                                                                                                                                                                                                                                           | 1.06 | 0.67         | 1.68         | .790 |
| 70-79 v 18-69                               | 32                                                                                                                                                                                                                            | 43.8 |               |       | 81                                                                                                                                                                                                                                            | 0.78 | 0.46         | 1.32         | .353 |
| 80+ v 18-79                                 | 10                                                                                                                                                                                                                            | 33.3 |               |       | 24                                                                                                                                                                                                                                            | 0.63 | 0.26         | 1.50         | .297 |
| <b>Education/Highest qualification</b>      |                                                                                                                                                                                                                               |      |               |       |                                                                                                                                                                                                                                               |      |              |              |      |
| No qualifications                           | 29                                                                                                                                                                                                                            | 27.9 | 31.212 (4)    | <.001 | 52                                                                                                                                                                                                                                            | ref  |              |              | .042 |
| Degree or equivalent and above              | 144                                                                                                                                                                                                                           | 56.7 |               |       | 280                                                                                                                                                                                                                                           | 2.18 | 1.12         | 4.23         | .021 |
| A levels / Vocational level 3 or equivalent | 79                                                                                                                                                                                                                            | 47.3 |               |       | 135                                                                                                                                                                                                                                           | 1.95 | 0.97         | 3.95         | .062 |
| Other qual'ns below A level / Voc level 3   | 34                                                                                                                                                                                                                            | 36.6 |               |       | 81                                                                                                                                                                                                                                            | 1.27 | 0.60         | 2.69         | .538 |
| Other qualification                         | 18                                                                                                                                                                                                                            | 35.3 |               |       | 38                                                                                                                                                                                                                                            | 1.03 | 0.42         | 2.53         | .941 |
| <b>Financial Status</b>                     |                                                                                                                                                                                                                               |      |               |       |                                                                                                                                                                                                                                               |      |              |              |      |
| Living comfortably                          | 84                                                                                                                                                                                                                            | 56.0 | 8.356 (4)     | .079  | 167                                                                                                                                                                                                                                           | ref  |              |              | .153 |
| Doing alright                               | 118                                                                                                                                                                                                                           | 42.4 |               |       | 256                                                                                                                                                                                                                                           | 0.69 | 0.46         | 1.05         | .081 |
| Just about getting by                       | 71                                                                                                                                                                                                                            | 43.3 |               |       | 114                                                                                                                                                                                                                                           | 0.62 | 0.37         | 1.05         | .074 |
| Finding it quite difficult                  | 22                                                                                                                                                                                                                            | 41.5 |               |       | 34                                                                                                                                                                                                                                            | 0.49 | 0.22         | 1.09         | .078 |
| Finding it very difficult                   | 11                                                                                                                                                                                                                            | 45.8 |               |       | 15                                                                                                                                                                                                                                            | 0.34 | 0.10         | 1.16         | .083 |
| <b>Country</b>                              |                                                                                                                                                                                                                               |      |               |       |                                                                                                                                                                                                                                               |      |              |              |      |
| Scotland                                    | 206                                                                                                                                                                                                                           | 46.9 | 1.208 (1)     | .272  | 381                                                                                                                                                                                                                                           | ref  |              |              |      |
| Wales                                       | 99                                                                                                                                                                                                                            | 42.5 |               |       | 205                                                                                                                                                                                                                                           | 1.09 | 0.76         | 1.57         | .642 |
| <b>Urban/rural</b>                          |                                                                                                                                                                                                                               |      |               |       |                                                                                                                                                                                                                                               |      |              |              |      |
| Urban                                       | 233                                                                                                                                                                                                                           | 46.9 | 1.719 (1)     | .190  | 409                                                                                                                                                                                                                                           |      |              |              |      |
| Rural                                       | 72                                                                                                                                                                                                                            | 41.1 |               |       | 177                                                                                                                                                                                                                                           | 0.62 | 0.42         | 0.91         | .015 |
| <b>Ethnicity</b>                            |                                                                                                                                                                                                                               |      |               |       |                                                                                                                                                                                                                                               |      |              |              |      |
| White British                               | 270                                                                                                                                                                                                                           | 45.3 | .147 (1)      | .702  | 535                                                                                                                                                                                                                                           | ref  |              |              |      |
| Other than white British                    | 32                                                                                                                                                                                                                            | 47.8 |               |       | 51                                                                                                                                                                                                                                            | 1.03 | 0.55         | 1.92         | .932 |
|                                             |                                                                                                                                                                                                                               |      |               |       | Hosmer & Lemeshow $\chi^2= 12.017$ , df=8, p=0.150.<br>Final model $\chi^2=35.151$ , df=18, p=0.009<br>Nagelkerke = .078<br>Cases correctly classified: 61.4%.<br>16 cases excluded due to missing data on one or more independent variables. |      |              |              |      |

\* adjusted for all other variables in the model, AOR, adjusted odds ratio; ref, reference category; 95% CI, 95% confidence interval. # Fisher-Freeman-Halton Exact Test.

**Table S8 Scientific and medical advisers – Association between trust in sources of information about COVID-19 vaccine and socio-demographic variables – (a) bivariate results and (b) multivariate logistic regression.**

|                                             | (a) Bivariate associations between socio-demographics and trusting COVID-19 vaccine info from scientific and medical advisers<br>% Trust completely or a great deal (weighted)<br>$\chi^2$ test for differences by demographics |      |               |       | (b) Logistic regression of trust in COVID-19 vaccine info from scientific and medical advisers<br>1 = Trust completely or a great deal (4008), 0 = Trust somewhat, very little or not at all (884)                                            |      |              |              |       |
|---------------------------------------------|---------------------------------------------------------------------------------------------------------------------------------------------------------------------------------------------------------------------------------|------|---------------|-------|-----------------------------------------------------------------------------------------------------------------------------------------------------------------------------------------------------------------------------------------------|------|--------------|--------------|-------|
|                                             | n                                                                                                                                                                                                                               | %    | $\chi^2$ (df) | P     | N                                                                                                                                                                                                                                             | AOR* | 95% CI Lower | 95% CI Upper | P     |
| <b>Gender</b>                               |                                                                                                                                                                                                                                 |      |               |       |                                                                                                                                                                                                                                               |      |              |              |       |
| Male                                        | 1885                                                                                                                                                                                                                            | 78.6 | 0.302 (2)     | .860  | 2097                                                                                                                                                                                                                                          | ref  |              |              | .544  |
| Female                                      | 2006                                                                                                                                                                                                                            | 78.2 |               |       | 2786                                                                                                                                                                                                                                          | 1.08 | 0.93         | 1.26         | .320  |
| Other                                       | 5                                                                                                                                                                                                                               | 71.4 |               |       | 9                                                                                                                                                                                                                                             | 0.71 | 0.14         | 3.51         | .674  |
| <b>Age</b>                                  |                                                                                                                                                                                                                                 |      |               |       |                                                                                                                                                                                                                                               |      |              |              |       |
| 18-29                                       | 644                                                                                                                                                                                                                             | 78.2 | 11.885 (6)    | .065  | 459                                                                                                                                                                                                                                           | ref  |              |              | .850  |
| 30-39 v 18-29                               | 643                                                                                                                                                                                                                             | 75.6 |               |       | 759                                                                                                                                                                                                                                           | 0.86 | 0.63         | 1.17         | .323  |
| 40-49 v 18-39                               | 631                                                                                                                                                                                                                             | 78.6 |               |       | 835                                                                                                                                                                                                                                           | 1.06 | 0.84         | 1.34         | .640  |
| 50-59 v 18-49                               | 677                                                                                                                                                                                                                             | 78.1 |               |       | 896                                                                                                                                                                                                                                           | 1.09 | 0.88         | 1.36         | .426  |
| 60-69 v 18-59                               | 572                                                                                                                                                                                                                             | 80.5 |               |       | 1004                                                                                                                                                                                                                                          | 1.03 | 0.84         | 1.26         | .785  |
| 70-79 v 18-69                               | 540                                                                                                                                                                                                                             | 82.2 |               |       | 763                                                                                                                                                                                                                                           | 1.05 | 0.84         | 1.32         | .654  |
| 80+ v 18-79                                 | 166                                                                                                                                                                                                                             | 76.1 |               |       | 176                                                                                                                                                                                                                                           | 1.10 | 0.72         | 1.68         | .650  |
| <b>Education/Highest qualification</b>      |                                                                                                                                                                                                                                 |      |               |       |                                                                                                                                                                                                                                               |      |              |              |       |
| No qualifications                           | 389                                                                                                                                                                                                                             | 63.1 | 147.739 (4)   | <.001 | 410                                                                                                                                                                                                                                           | ref  |              |              | <.001 |
| Degree or equivalent and above              | 1743                                                                                                                                                                                                                            | 84.1 |               |       | 2453                                                                                                                                                                                                                                          | 3.21 | 2.50         | 4.13         | <.001 |
| A levels / Vocational level 3 or equivalent | 905                                                                                                                                                                                                                             | 80.0 |               |       | 990                                                                                                                                                                                                                                           | 2.70 | 2.04         | 3.55         | <.001 |
| Other qual'ns below A level / Voc level 3   | 653                                                                                                                                                                                                                             | 77.8 |               |       | 784                                                                                                                                                                                                                                           | 1.98 | 1.51         | 2.61         | <.001 |
| Other qualification                         | 205                                                                                                                                                                                                                             | 67.7 |               |       | 255                                                                                                                                                                                                                                           | 1.23 | 0.87         | 1.73         | .245  |
| <b>Financial Status</b>                     |                                                                                                                                                                                                                                 |      |               |       |                                                                                                                                                                                                                                               |      |              |              |       |
| Living comfortably                          | 1110                                                                                                                                                                                                                            | 86.4 | 154.081 (4)   | <.001 | 1532                                                                                                                                                                                                                                          | ref  |              |              | <.001 |
| Doing alright                               | 1640                                                                                                                                                                                                                            | 80.6 |               |       | 1997                                                                                                                                                                                                                                          | 0.65 | 0.53         | 0.80         | <.001 |
| Just about getting by                       | 797                                                                                                                                                                                                                             | 70.4 |               |       | 960                                                                                                                                                                                                                                           | 0.46 | 0.36         | 0.58         | <.001 |
| Finding it quite difficult                  | 249                                                                                                                                                                                                                             | 73.9 |               |       | 266                                                                                                                                                                                                                                           | 0.51 | 0.36         | 0.72         | <.001 |
| Finding it very difficult                   | 97                                                                                                                                                                                                                              | 55.7 |               |       | 137                                                                                                                                                                                                                                           | 0.32 | 0.21         | 0.48         | <.001 |
| <b>Country</b>                              |                                                                                                                                                                                                                                 |      |               |       |                                                                                                                                                                                                                                               |      |              |              |       |
| England                                     | 3375                                                                                                                                                                                                                            | 78.8 | 3.260 (2)     | .196  | 4300                                                                                                                                                                                                                                          | ref  |              |              | .068  |
| Scotland                                    | 341                                                                                                                                                                                                                             | 77.0 |               |       | 384                                                                                                                                                                                                                                           | 1.03 | 0.77         | 1.37         | .843  |
| Wales                                       | 176                                                                                                                                                                                                                             | 74.3 |               |       | 208                                                                                                                                                                                                                                           | 0.67 | 0.47         | 0.94         | .022  |
| <b>Urban/rural</b>                          |                                                                                                                                                                                                                                 |      |               |       |                                                                                                                                                                                                                                               |      |              |              |       |
| Urban                                       | 3108                                                                                                                                                                                                                            | 77.7 | 5.368 (1)     | .021  | 3727                                                                                                                                                                                                                                          |      |              |              |       |
| Rural                                       | 783                                                                                                                                                                                                                             | 81.1 |               |       | 1165                                                                                                                                                                                                                                          | 1.00 | 0.83         | 1.20         | .978  |
| <b>Ethnicity</b>                            |                                                                                                                                                                                                                                 |      |               |       |                                                                                                                                                                                                                                               |      |              |              |       |
| White British                               | 3236                                                                                                                                                                                                                            | 80.9 | 87.036 (5)    | <.001 | 4225                                                                                                                                                                                                                                          | ref  |              |              | <.001 |
| Any other white background                  | 244                                                                                                                                                                                                                             | 72.8 |               |       | 318                                                                                                                                                                                                                                           | 0.56 | 0.42         | 0.75         | <.001 |
| Mixed or multiple ethnic groups             | 68                                                                                                                                                                                                                              | 70.8 |               |       | 62                                                                                                                                                                                                                                            | 0.51 | 0.28         | 0.92         | .025  |
| Asian or Asian British                      | 203                                                                                                                                                                                                                             | 66.6 |               |       | 160                                                                                                                                                                                                                                           | 0.46 | 0.32         | 0.67         | <.001 |
| Black or Black British                      | 57                                                                                                                                                                                                                              | 56.4 |               |       | 67                                                                                                                                                                                                                                            | 0.31 | 0.19         | 0.53         | <.001 |
| Other                                       | 53                                                                                                                                                                                                                              | 65.4 |               |       | 60                                                                                                                                                                                                                                            | 0.43 | 0.24         | 0.76         | .004  |
|                                             |                                                                                                                                                                                                                                 |      |               |       | Hosmer & Lemeshow $\chi^2= 5.496$ , df=8, p=0.704.<br>Final model $\chi^2=268.594$ , df=24, p<0.001<br>Nagelkerke = .087<br>Cases correctly classified: 82.1%.<br>86 cases excluded due to missing data on one or more independent variables. |      |              |              |       |

\* adjusted for all other variables in the model, AOR, adjusted odds ratio; ref, reference category; 95% CI, 95% confidence interval.

**Table S9 The World Health Organisation (WHO) – Association between trust in sources of information about COVID-19 vaccine and socio-demographic variables – (a) bivariate results and (b) multivariate logistic regression.**

|                                             | (a) Bivariate associations between socio-demographics and trusting COVID-19 vaccine info from The World Health Organisation (WHO)<br>% Trust completely or a great deal (weighted)<br>$\chi^2$ test for differences by demographics |      |                     |       | (b) Logistic regression of trust in COVID-19 vaccine info from The World Health Organisation (WHO)<br>1 = Trust completely or a great deal (3423), 0 = Trust somewhat, very little or not at all (1468)                                        |      |              |              |       |
|---------------------------------------------|-------------------------------------------------------------------------------------------------------------------------------------------------------------------------------------------------------------------------------------|------|---------------------|-------|------------------------------------------------------------------------------------------------------------------------------------------------------------------------------------------------------------------------------------------------|------|--------------|--------------|-------|
|                                             | n                                                                                                                                                                                                                                   | %    | $\chi^2$ (df)       | P     | N                                                                                                                                                                                                                                              | AOR* | 95% CI Lower | 95% CI Upper | P     |
| <b>Gender</b>                               |                                                                                                                                                                                                                                     |      |                     |       |                                                                                                                                                                                                                                                |      |              |              |       |
| Male                                        | 1523                                                                                                                                                                                                                                | 63.7 | 23.303 <sup>#</sup> | <.001 | 2097                                                                                                                                                                                                                                           | ref  |              |              | <.001 |
| Female                                      | 1797                                                                                                                                                                                                                                | 70.1 |                     |       | 2785                                                                                                                                                                                                                                           | 1.49 | 1.31         | 1.69         | <.001 |
| Other                                       | 5                                                                                                                                                                                                                                   | 71.4 |                     |       | 9                                                                                                                                                                                                                                              | 1.92 | 0.39         | 9.42         | .420  |
| <b>Age</b>                                  |                                                                                                                                                                                                                                     |      |                     |       |                                                                                                                                                                                                                                                |      |              |              |       |
| 18-29                                       | 556                                                                                                                                                                                                                                 | 68.1 | 5.005 (6)           | .543  | 458                                                                                                                                                                                                                                            | ref  |              |              | .177  |
| 30-39 v 18-29                               | 549                                                                                                                                                                                                                                 | 64.5 |                     |       | 760                                                                                                                                                                                                                                            | 0.84 | 0.65         | 1.10         | .203  |
| 40-49 v 18-39                               | 538                                                                                                                                                                                                                                 | 67.1 |                     |       | 835                                                                                                                                                                                                                                            | 0.98 | 0.81         | 1.20         | .882  |
| 50-59 v 18-49                               | 593                                                                                                                                                                                                                                 | 68.4 |                     |       | 896                                                                                                                                                                                                                                            | 1.15 | 0.96         | 1.39         | .126  |
| 60-69 v 18-59                               | 484                                                                                                                                                                                                                                 | 68.1 |                     |       | 1004                                                                                                                                                                                                                                           | 0.89 | 0.76         | 1.06         | .189  |
| 70-79 v 18-69                               | 450                                                                                                                                                                                                                                 | 68.6 |                     |       | 762                                                                                                                                                                                                                                            | 0.87 | 0.73         | 1.04         | .127  |
| 80+ v 18-79                                 | 140                                                                                                                                                                                                                                 | 64.8 |                     |       | 176                                                                                                                                                                                                                                            | 0.86 | 0.62         | 1.20         | .366  |
| <b>Education/Highest qualification</b>      |                                                                                                                                                                                                                                     |      |                     |       |                                                                                                                                                                                                                                                |      |              |              |       |
| No qualifications                           | 351                                                                                                                                                                                                                                 | 56.9 | 75.592 (4)          | <.001 | 410                                                                                                                                                                                                                                            | ref  |              |              | <.001 |
| Degree or equivalent and above              | 1490                                                                                                                                                                                                                                | 72.3 |                     |       | 2452                                                                                                                                                                                                                                           | 1.73 | 1.38         | 2.18         | <.001 |
| A levels / Vocational level 3 or equivalent | 758                                                                                                                                                                                                                                 | 67.0 |                     |       | 990                                                                                                                                                                                                                                            | 1.39 | 1.08         | 1.77         | .010  |
| Other qual'ns below A level / Voc level 3   | 561                                                                                                                                                                                                                                 | 66.9 |                     |       | 784                                                                                                                                                                                                                                            | 1.36 | 1.06         | 1.76         | .017  |
| Other qualification                         | 166                                                                                                                                                                                                                                 | 54.6 |                     |       | 255                                                                                                                                                                                                                                            | 0.88 | 0.64         | 1.21         | .428  |
| <b>Financial Status</b>                     |                                                                                                                                                                                                                                     |      |                     |       |                                                                                                                                                                                                                                                |      |              |              |       |
| Living comfortably                          | 953                                                                                                                                                                                                                                 | 74.2 | 67.486 (4)          | <.001 | 1533                                                                                                                                                                                                                                           | ref  |              |              | <.001 |
| Doing alright                               | 1384                                                                                                                                                                                                                                | 68.2 |                     |       | 1995                                                                                                                                                                                                                                           | 0.78 | 0.66         | 0.91         | .002  |
| Just about getting by                       | 691                                                                                                                                                                                                                                 | 61.0 |                     |       | 960                                                                                                                                                                                                                                            | 0.60 | 0.50         | 0.73         | <.001 |
| Finding it quite difficult                  | 204                                                                                                                                                                                                                                 | 60.4 |                     |       | 266                                                                                                                                                                                                                                            | 0.56 | 0.42         | 0.75         | <.001 |
| Finding it very difficult                   | 92                                                                                                                                                                                                                                  | 54.8 |                     |       | 137                                                                                                                                                                                                                                            | 0.45 | 0.31         | 0.65         | <.001 |
| <b>Country</b>                              |                                                                                                                                                                                                                                     |      |                     |       |                                                                                                                                                                                                                                                |      |              |              |       |
| England                                     | 2880                                                                                                                                                                                                                                | 67.4 | 2.028 (2)           | .363  | -                                                                                                                                                                                                                                              | -    | -            | -            | -     |
| Scotland                                    | 283                                                                                                                                                                                                                                 | 64.0 |                     |       | -                                                                                                                                                                                                                                              | -    | -            | -            | -     |
| Wales                                       | 160                                                                                                                                                                                                                                 | 67.5 |                     |       | -                                                                                                                                                                                                                                              | -    | -            | -            | -     |
| <b>Urban/rural</b>                          |                                                                                                                                                                                                                                     |      |                     |       |                                                                                                                                                                                                                                                |      |              |              |       |
| Urban                                       | 2663                                                                                                                                                                                                                                | 66.7 | 1.288 (1)           | .256  | 3727                                                                                                                                                                                                                                           |      |              |              |       |
| Rural                                       | 660                                                                                                                                                                                                                                 | 68.6 |                     |       | 1164                                                                                                                                                                                                                                           | 0.99 | 0.85         | 1.15         | .897  |
| <b>Ethnicity</b>                            |                                                                                                                                                                                                                                     |      |                     |       |                                                                                                                                                                                                                                                |      |              |              |       |
| White British                               | 2737                                                                                                                                                                                                                                | 68.5 | 30.713 (5)          | <.001 | 4224                                                                                                                                                                                                                                           | ref  |              |              | <.001 |
| Any other white background                  | 223                                                                                                                                                                                                                                 | 66.4 |                     |       | 318                                                                                                                                                                                                                                            | 0.75 | 0.58         | 0.96         | .023  |
| Mixed or multiple ethnic groups             | 59                                                                                                                                                                                                                                  | 61.5 |                     |       | 62                                                                                                                                                                                                                                             | 0.63 | 0.37         | 1.07         | .089  |
| Asian or Asian British                      | 171                                                                                                                                                                                                                                 | 57.2 |                     |       | 160                                                                                                                                                                                                                                            | 0.64 | 0.46         | 0.90         | .010  |
| Black or Black British                      | 55                                                                                                                                                                                                                                  | 53.9 |                     |       | 67                                                                                                                                                                                                                                             | 0.44 | 0.27         | 0.72         | .001  |
| Other                                       | 45                                                                                                                                                                                                                                  | 56.3 |                     |       | 60                                                                                                                                                                                                                                             | 0.61 | 0.36         | 1.04         | .068  |
|                                             |                                                                                                                                                                                                                                     |      |                     |       | Hosmer & Lemeshow $\chi^2= 14.933$ , df=8, p=0.060.<br>Final model $\chi^2=172.240$ , df=22, p<0.001<br>Nagelkerke = .049<br>Cases correctly classified: 70.0%.<br>87 cases excluded due to missing data on one or more independent variables. |      |              |              |       |

\* adjusted for all other variables in the model, AOR, adjusted odds ratio; ref, reference category; 95% CI, 95% confidence interval. <sup>#</sup> Fisher-Freeman-Halton Exact Test. Country was excluded from the logistic regression to achieve model fit.



**Table S10 The media (e.g. newspapers, magazines, television, radio) – Association between trust in sources of information about COVID-19 vaccine and socio-demographic variables – (a) bivariate results and (b) multivariate logistic regression.**

|                                             | (a) Bivariate associations between socio-demographics and trusting COVID-19 vaccine info from the media<br>% Trust completely or a great deal (weighted)<br>$\chi^2$ test for differences by demographics |      |               |       | (b) Logistic regression of trust in COVID-19 vaccine info from the media<br>1 = Trust completely or a great deal (361), 0 = Trust somewhat, very little or not at all (4530)                                                                |      |              |              |       |
|---------------------------------------------|-----------------------------------------------------------------------------------------------------------------------------------------------------------------------------------------------------------|------|---------------|-------|---------------------------------------------------------------------------------------------------------------------------------------------------------------------------------------------------------------------------------------------|------|--------------|--------------|-------|
|                                             | n                                                                                                                                                                                                         | %    | $\chi^2$ (df) | P     | N                                                                                                                                                                                                                                           | AOR* | 95% CI Lower | 95% CI Upper | P     |
| <b>Gender</b>                               |                                                                                                                                                                                                           |      |               |       |                                                                                                                                                                                                                                             |      |              |              |       |
| Male                                        | 176                                                                                                                                                                                                       | 7.3  | 2.193 (2)     | .334  | 2097                                                                                                                                                                                                                                        |      |              |              | .575  |
| Female                                      | 213                                                                                                                                                                                                       | 8.3  |               |       | 2785                                                                                                                                                                                                                                        | 1.13 | 0.90         | 1.41         | .293  |
| Other                                       | 0                                                                                                                                                                                                         | 0.0  |               |       | 9                                                                                                                                                                                                                                           | 0.00 | 0.00         |              | .999  |
| <b>Age</b>                                  |                                                                                                                                                                                                           |      |               |       |                                                                                                                                                                                                                                             |      |              |              |       |
| 18-29                                       | 57                                                                                                                                                                                                        | 6.9  | 39.450 (6)    | <.001 | 459                                                                                                                                                                                                                                         |      |              |              | .003  |
| 30-39 v 18-29                               | 57                                                                                                                                                                                                        | 6.7  |               |       | 759                                                                                                                                                                                                                                         | 0.84 | 0.52         | 1.35         | .462  |
| 40-49 v 18-39                               | 52                                                                                                                                                                                                        | 6.5  |               |       | 834                                                                                                                                                                                                                                         | 1.04 | 0.72         | 1.49         | .848  |
| 50-59 v 18-49                               | 58                                                                                                                                                                                                        | 6.7  |               |       | 895                                                                                                                                                                                                                                         | 1.08 | 0.78         | 1.50         | .629  |
| 60-69 v 18-59                               | 49                                                                                                                                                                                                        | 6.9  |               |       | 1004                                                                                                                                                                                                                                        | 1.05 | 0.77         | 1.42         | .761  |
| 70-79 v 18-69                               | 85                                                                                                                                                                                                        | 12.9 |               |       | 763                                                                                                                                                                                                                                         | 1.75 | 1.32         | 2.33         | <.001 |
| 80+ v 18-79                                 | 29                                                                                                                                                                                                        | 13.3 |               |       | 177                                                                                                                                                                                                                                         | 1.74 | 1.07         | 2.83         | .024  |
| <b>Education/Highest qualification</b>      |                                                                                                                                                                                                           |      |               |       |                                                                                                                                                                                                                                             |      |              |              |       |
| No qualifications                           | 77                                                                                                                                                                                                        | 12.5 | 34.152 (4)    | <.001 | 409                                                                                                                                                                                                                                         |      |              |              | .005  |
| Degree or equivalent and above              | 153                                                                                                                                                                                                       | 7.4  |               |       | 2454                                                                                                                                                                                                                                        | 0.63 | 0.44         | 0.90         | .011  |
| A levels / Vocational level 3 or equivalent | 58                                                                                                                                                                                                        | 5.1  |               |       | 990                                                                                                                                                                                                                                         | 0.44 | 0.29         | 0.68         | <.001 |
| Other qual'ns below A level / Voc level 3   | 79                                                                                                                                                                                                        | 9.4  |               |       | 784                                                                                                                                                                                                                                         | 0.72 | 0.48         | 1.07         | .102  |
| Other qualification                         | 21                                                                                                                                                                                                        | 7.0  |               |       | 254                                                                                                                                                                                                                                         | 0.56 | 0.31         | 1.00         | .051  |
| <b>Financial Status</b>                     |                                                                                                                                                                                                           |      |               |       |                                                                                                                                                                                                                                             |      |              |              |       |
| Living comfortably                          | 105                                                                                                                                                                                                       | 8.2  | 34.041 (4)    | <.001 | 1533                                                                                                                                                                                                                                        |      |              |              | .671  |
| Doing alright                               | 122                                                                                                                                                                                                       | 6.0  |               |       | 1996                                                                                                                                                                                                                                        | 0.90 | 0.69         | 1.16         | .413  |
| Just about getting by                       | 99                                                                                                                                                                                                        | 8.8  |               |       | 959                                                                                                                                                                                                                                         | 1.01 | 0.73         | 1.39         | .974  |
| Finding it quite difficult                  | 33                                                                                                                                                                                                        | 9.8  |               |       | 266                                                                                                                                                                                                                                         | 1.22 | 0.75         | 1.98         | .430  |
| Finding it very difficult                   | 30                                                                                                                                                                                                        | 17.2 |               |       | 137                                                                                                                                                                                                                                         | 0.79 | 0.37         | 1.68         | .535  |
| <b>Country</b>                              |                                                                                                                                                                                                           |      |               |       |                                                                                                                                                                                                                                             |      |              |              |       |
| England                                     | 336                                                                                                                                                                                                       | 7.8  | .515 (2)      | .773  | 4300                                                                                                                                                                                                                                        |      |              |              | .457  |
| Scotland                                    | 32                                                                                                                                                                                                        | 7.3  |               |       | 383                                                                                                                                                                                                                                         | 0.79 | 0.51         | 1.24         | .313  |
| Wales                                       | 21                                                                                                                                                                                                        | 8.8  |               |       | 208                                                                                                                                                                                                                                         | 1.19 | 0.71         | 2.00         | .499  |
| <b>Urban/rural</b>                          |                                                                                                                                                                                                           |      |               |       |                                                                                                                                                                                                                                             |      |              |              |       |
| Urban                                       | 323                                                                                                                                                                                                       | 8.1  | 1.957 (1)     | .162  | 3726                                                                                                                                                                                                                                        |      |              |              |       |
| Rural                                       | 65                                                                                                                                                                                                        | 6.7  |               |       | 1165                                                                                                                                                                                                                                        | 0.91 | 0.70         | 1.19         | .486  |
| <b>Ethnicity</b>                            |                                                                                                                                                                                                           |      |               |       |                                                                                                                                                                                                                                             |      |              |              |       |
| White British                               | 296                                                                                                                                                                                                       | 7.4  | 6.645 (5)     | .248  | 4226                                                                                                                                                                                                                                        |      |              |              | .073  |
| Any other white background                  | 30                                                                                                                                                                                                        | 9.0  |               |       | 318                                                                                                                                                                                                                                         | 1.55 | 1.03         | 2.32         | .035  |
| Mixed or multiple ethnic groups             | 6                                                                                                                                                                                                         | 6.2  |               |       | 62                                                                                                                                                                                                                                          | 1.31 | 0.52         | 3.33         | .570  |
| Asian or Asian British                      | 30                                                                                                                                                                                                        | 9.9  |               |       | 160                                                                                                                                                                                                                                         | 1.73 | 1.02         | 2.94         | .043  |
| Black or Black British                      | 12                                                                                                                                                                                                        | 11.9 |               |       | 66                                                                                                                                                                                                                                          | 1.84 | 0.82         | 4.12         | .139  |
| Other                                       | 8                                                                                                                                                                                                         | 10.3 |               |       | 59                                                                                                                                                                                                                                          | 1.62 | 0.68         | 3.85         | .274  |
|                                             |                                                                                                                                                                                                           |      |               |       | Hosmer & Lemeshow $\chi^2=2.359$ , df=8, p=0.968.<br>Final model $\chi^2=54.051$ , df=24, p<0.001<br>Nagelkerke = .027<br>Cases correctly classified: 92.6%.<br>87 cases excluded due to missing data on one or more independent variables. |      |              |              |       |

\* adjusted for all other variables in the model, AOR, adjusted odds ratio; ref, reference category; 95% CI, 95% confidence interval.

**Table S11 Social media – Association between trust in sources of information about COVID-19 vaccine and socio-demographic variables – (a) bivariate results and (b) multivariate logistic regression.**

|                                             | (a) Bivariate associations between socio-demographics and trusting COVID-19 vaccine info from social media<br>% Trust completely or a great deal (weighted)<br>$\chi^2$ test for differences by demographics |     |               |       | (b) Logistic regression of trust in COVID-19 vaccine info from social media<br>1 = Trust completely or a great deal (95), 0 = Trust somewhat, very little or not at all (4792)                                                               |      |              |              |       |
|---------------------------------------------|--------------------------------------------------------------------------------------------------------------------------------------------------------------------------------------------------------------|-----|---------------|-------|----------------------------------------------------------------------------------------------------------------------------------------------------------------------------------------------------------------------------------------------|------|--------------|--------------|-------|
|                                             | n                                                                                                                                                                                                            | %   | $\chi^2$ (df) | P     | N                                                                                                                                                                                                                                            | AOR* | 95% CI Lower | 95% CI Upper | P     |
| <b>Gender</b>                               |                                                                                                                                                                                                              |     |               |       |                                                                                                                                                                                                                                              |      |              |              |       |
| Male                                        | 63                                                                                                                                                                                                           | 2.6 | 0.284 (2)     | .868  | 2094                                                                                                                                                                                                                                         | ref  |              |              | .845  |
| Female                                      | 71                                                                                                                                                                                                           | 2.8 |               |       | 2784                                                                                                                                                                                                                                         | 1.13 | 0.74         | 1.73         | .561  |
| Other                                       | 0                                                                                                                                                                                                            | 0.0 |               |       | 9                                                                                                                                                                                                                                            | 0.00 | 0.00         |              | .999  |
| <b>Age</b>                                  |                                                                                                                                                                                                              |     |               |       |                                                                                                                                                                                                                                              |      |              |              |       |
| 18-29                                       | 31                                                                                                                                                                                                           | 3.8 | 12.626 (6)    | .049  | 459                                                                                                                                                                                                                                          | ref  |              |              | .634  |
| 30-39 v 18-29                               | 25                                                                                                                                                                                                           | 2.9 |               |       | 759                                                                                                                                                                                                                                          | 0.55 | 0.24         | 1.22         | .139  |
| 40-49 v 18-39                               | 22                                                                                                                                                                                                           | 2.7 |               |       | 835                                                                                                                                                                                                                                          | 0.89 | 0.47         | 1.67         | .713  |
| 50-59 v 18-49                               | 13                                                                                                                                                                                                           | 1.5 |               |       | 896                                                                                                                                                                                                                                          | 0.85 | 0.47         | 1.55         | .596  |
| 60-69 v 18-59                               | 13                                                                                                                                                                                                           | 1.8 |               |       | 1003                                                                                                                                                                                                                                         | 0.71 | 0.39         | 1.29         | .259  |
| 70-79 v 18-69                               | 19                                                                                                                                                                                                           | 2.9 |               |       | 761                                                                                                                                                                                                                                          | 1.11 | 0.62         | 1.97         | .727  |
| 80+ v 18-79                                 | 9                                                                                                                                                                                                            | 4.2 |               |       | 174                                                                                                                                                                                                                                          | 1.26 | 0.49         | 3.25         | .631  |
| <b>Education/Highest qualification</b>      |                                                                                                                                                                                                              |     |               |       |                                                                                                                                                                                                                                              |      |              |              |       |
| No qualifications                           | 31                                                                                                                                                                                                           | 5.1 | 24.978 (4)    | <.001 | 409                                                                                                                                                                                                                                          | ref  |              |              | <.001 |
| Degree or equivalent and above              | 44                                                                                                                                                                                                           | 2.1 |               |       | 2452                                                                                                                                                                                                                                         | 0.24 | 0.13         | 0.44         | <.001 |
| A levels / Vocational level 3 or equivalent | 18                                                                                                                                                                                                           | 1.6 |               |       | 989                                                                                                                                                                                                                                          | 0.32 | 0.16         | 0.64         | .001  |
| Other qual'ns below A level / Voc level 3   | 32                                                                                                                                                                                                           | 3.8 |               |       | 782                                                                                                                                                                                                                                          | 0.50 | 0.26         | 0.94         | .031  |
| Other qualification                         | 8                                                                                                                                                                                                            | 2.6 |               |       | 255                                                                                                                                                                                                                                          | 0.46 | 0.18         | 1.18         | .106  |
| <b>Financial Status</b>                     |                                                                                                                                                                                                              |     |               |       |                                                                                                                                                                                                                                              |      |              |              |       |
| Living comfortably                          | 34                                                                                                                                                                                                           | 2.6 | 26.413 (4)    | <.001 | 1531                                                                                                                                                                                                                                         | ref  |              |              | .522  |
| Doing alright                               | 38                                                                                                                                                                                                           | 1.9 |               |       | 1994                                                                                                                                                                                                                                         | 0.73 | 0.43         | 1.24         | .241  |
| Just about getting by                       | 35                                                                                                                                                                                                           | 3.1 |               |       | 959                                                                                                                                                                                                                                          | 0.99 | 0.55         | 1.79         | .976  |
| Finding it quite difficult                  | 12                                                                                                                                                                                                           | 3.6 |               |       | 266                                                                                                                                                                                                                                          | 1.35 | 0.60         | 3.04         | .473  |
| Finding it very difficult                   | 14                                                                                                                                                                                                           | 8.1 |               |       | 137                                                                                                                                                                                                                                          | 0.81 | 0.23         | 2.84         | .746  |
| <b>Country</b>                              |                                                                                                                                                                                                              |     |               |       |                                                                                                                                                                                                                                              |      |              |              |       |
| England                                     | 118                                                                                                                                                                                                          | 2.8 | .404(2)       | .817  | 4295                                                                                                                                                                                                                                         | ref  |              |              | .215  |
| Scotland                                    | 10                                                                                                                                                                                                           | 2.3 |               |       | 384                                                                                                                                                                                                                                          | 0.40 | 0.12         | 1.27         | .120  |
| Wales                                       | 6                                                                                                                                                                                                            | 2.5 |               |       | 208                                                                                                                                                                                                                                          | 1.42 | 0.56         | 3.58         | .463  |
| <b>Urban/rural</b>                          |                                                                                                                                                                                                              |     |               |       |                                                                                                                                                                                                                                              |      |              |              |       |
| Urban                                       | 122                                                                                                                                                                                                          | 3.1 | 9.660(1)      | .002  | 3724                                                                                                                                                                                                                                         |      |              |              |       |
| Rural                                       | 12                                                                                                                                                                                                           | 1.2 |               |       | 1163                                                                                                                                                                                                                                         | 0.57 | 0.31         | 1.05         | .071  |
| <b>Ethnicity</b>                            |                                                                                                                                                                                                              |     |               |       |                                                                                                                                                                                                                                              |      |              |              |       |
| White British                               | 94                                                                                                                                                                                                           | 2.4 | 17.781#       | .002  | 4220                                                                                                                                                                                                                                         | ref  |              |              | .326  |
| Any other white background                  | 7                                                                                                                                                                                                            | 2.1 |               |       | 318                                                                                                                                                                                                                                          | 1.00 | 0.39         | 2.53         | .994  |
| Mixed or multiple ethnic groups             | 4                                                                                                                                                                                                            | 4.1 |               |       | 62                                                                                                                                                                                                                                           | 2.52 | 0.75         | 8.45         | .134  |
| Asian or Asian British                      | 14                                                                                                                                                                                                           | 4.6 |               |       | 160                                                                                                                                                                                                                                          | 1.85 | 0.77         | 4.45         | .172  |
| Black or Black British                      | 9                                                                                                                                                                                                            | 8.8 |               |       | 69                                                                                                                                                                                                                                           | 2.57 | 0.76         | 8.64         | .128  |
| Other                                       | 1                                                                                                                                                                                                            | 1.2 |               |       | 60                                                                                                                                                                                                                                           | 0.83 | 0.11         | 6.20         | .855  |
|                                             |                                                                                                                                                                                                              |     |               |       | Hosmer & Lemeshow $\chi^2= 5.858$ , df=8, p=0.663.<br>Final model $\chi^2=46.839$ , df=24, p=0.004<br>Nagelkerke = .055<br>Cases correctly classified: 98.1%.<br>91 cases excluded due to missing data on one or more independent variables. |      |              |              |       |

\* adjusted for all other variables in the model, AOR, adjusted odds ratio; ref, reference category; 95% CI, 95% confidence interval. # Fisher-Freeman-Halton Exact Test.

**Table S12 Celebrities and social media influencers – Association between trust in sources of information about COVID-19 vaccine and socio-demographic variables – (a) bivariate results and (b) multivariate logistic regression.**

|                                             | (a) Bivariate associations between socio-demographics and trusting COVID-19 vaccine info from celebrities and social media influencers<br>% Trust completely or a great deal (weighted)<br>$\chi^2$ test for differences by demographics |     |                     |       | (b) Logistic regression of trust in COVID-19 vaccine info from celebrities and social media influencers<br>1 = Trust completely or a great deal (95), 0 = Trust somewhat, very little or not at all (4795)                                  |      |              |              |       |
|---------------------------------------------|------------------------------------------------------------------------------------------------------------------------------------------------------------------------------------------------------------------------------------------|-----|---------------------|-------|---------------------------------------------------------------------------------------------------------------------------------------------------------------------------------------------------------------------------------------------|------|--------------|--------------|-------|
|                                             | n                                                                                                                                                                                                                                        | %   | $\chi^2$ (df)       | P     | N                                                                                                                                                                                                                                           | AOR* | 95% CI Lower | 95% CI Upper | P     |
| <b>Gender</b>                               |                                                                                                                                                                                                                                          |     |                     |       |                                                                                                                                                                                                                                             |      |              |              |       |
| Male                                        | 57                                                                                                                                                                                                                                       | 2.4 | 1.430 (2)           | .489  | 2097                                                                                                                                                                                                                                        | ref  |              |              | .996  |
| Female                                      | 74                                                                                                                                                                                                                                       | 2.9 |                     |       | 2784                                                                                                                                                                                                                                        | 0.98 | 0.65         | 1.49         | .928  |
| Other                                       | 0                                                                                                                                                                                                                                        | 0.0 |                     |       | 9                                                                                                                                                                                                                                           | 0.00 | 0.00         |              | .999  |
| <b>Age</b>                                  |                                                                                                                                                                                                                                          |     |                     |       |                                                                                                                                                                                                                                             |      |              |              |       |
| 18-29                                       | 24                                                                                                                                                                                                                                       | 2.9 | 19.156 (6)          | .004  | 459                                                                                                                                                                                                                                         | ref  |              |              | .348  |
| 30-39 v 18-29                               | 25                                                                                                                                                                                                                                       | 3.0 |                     |       | 758                                                                                                                                                                                                                                         | 0.90 | 0.37         | 2.21         | .818  |
| 40-49 v 18-39                               | 23                                                                                                                                                                                                                                       | 2.9 |                     |       | 835                                                                                                                                                                                                                                         | 1.11 | 0.58         | 2.14         | .744  |
| 50-59 v 18-49                               | 18                                                                                                                                                                                                                                       | 2.1 |                     |       | 895                                                                                                                                                                                                                                         | 1.28 | 0.73         | 2.25         | .390  |
| 60-69 v 18-59                               | 9                                                                                                                                                                                                                                        | 1.3 |                     |       | 1004                                                                                                                                                                                                                                        | 0.65 | 0.34         | 1.25         | .192  |
| 70-79 v 18-69                               | 17                                                                                                                                                                                                                                       | 2.6 |                     |       | 762                                                                                                                                                                                                                                         | 1.26 | 0.70         | 2.28         | .441  |
| 80+ v 18-79                                 | 14                                                                                                                                                                                                                                       | 6.4 |                     |       | 177                                                                                                                                                                                                                                         | 2.18 | 0.96         | 4.98         | .064  |
| <b>Education/Highest qualification</b>      |                                                                                                                                                                                                                                          |     |                     |       |                                                                                                                                                                                                                                             |      |              |              |       |
| No qualifications                           | 35                                                                                                                                                                                                                                       | 5.7 | 58.886 (4)          | <.001 | 409                                                                                                                                                                                                                                         | ref  |              |              | .002  |
| Degree or equivalent and above              | 32                                                                                                                                                                                                                                       | 1.5 |                     |       | 2453                                                                                                                                                                                                                                        | 0.31 | 0.17         | 0.58         | <.001 |
| A levels / Vocational level 3 or equivalent | 13                                                                                                                                                                                                                                       | 1.1 |                     |       | 990                                                                                                                                                                                                                                         | 0.31 | 0.15         | 0.65         | .002  |
| Other qual'ns below A level / Voc level 3   | 41                                                                                                                                                                                                                                       | 4.9 |                     |       | 783                                                                                                                                                                                                                                         | 0.59 | 0.31         | 1.11         | .103  |
| Other qualification                         | 10                                                                                                                                                                                                                                       | 3.3 |                     |       | 255                                                                                                                                                                                                                                         | 0.57 | 0.24         | 1.40         | .221  |
| <b>Financial Status</b>                     |                                                                                                                                                                                                                                          |     |                     |       |                                                                                                                                                                                                                                             |      |              |              |       |
| Living comfortably                          | 23                                                                                                                                                                                                                                       | 1.8 | 53.820 (4)          | <.001 | 1533                                                                                                                                                                                                                                        | ref  |              |              | .022  |
| Doing alright                               | 27                                                                                                                                                                                                                                       | 1.3 |                     |       | 1995                                                                                                                                                                                                                                        | 1.01 | 0.56         | 1.82         | .975  |
| Just about getting by                       | 59                                                                                                                                                                                                                                       | 5.2 |                     |       | 959                                                                                                                                                                                                                                         | 2.08 | 1.13         | 3.80         | .018  |
| Finding it quite difficult                  | 11                                                                                                                                                                                                                                       | 3.3 |                     |       | 266                                                                                                                                                                                                                                         | 2.47 | 1.08         | 5.64         | .032  |
| Finding it very difficult                   | 10                                                                                                                                                                                                                                       | 5.7 |                     |       | 137                                                                                                                                                                                                                                         | 1.86 | 0.60         | 5.77         | .284  |
| <b>Country</b>                              |                                                                                                                                                                                                                                          |     |                     |       |                                                                                                                                                                                                                                             |      |              |              |       |
| England                                     | 117                                                                                                                                                                                                                                      | 2.7 | 11.948 (2)          | .003  | 4299                                                                                                                                                                                                                                        | ref  |              |              | .028  |
| Scotland                                    | 3                                                                                                                                                                                                                                        | 0.7 |                     |       | 383                                                                                                                                                                                                                                         | 0.40 | 0.13         | 1.29         | .127  |
| Wales                                       | 12                                                                                                                                                                                                                                       | 5.0 |                     |       | 208                                                                                                                                                                                                                                         | 2.26 | 1.06         | 4.82         | .036  |
| <b>Urban/rural</b>                          |                                                                                                                                                                                                                                          |     |                     |       |                                                                                                                                                                                                                                             |      |              |              |       |
| Urban                                       | 119                                                                                                                                                                                                                                      | 3.0 | 9.096 (1)           | .003  | 3725                                                                                                                                                                                                                                        |      |              |              |       |
| Rural                                       | 12                                                                                                                                                                                                                                       | 1.2 |                     |       | 1165                                                                                                                                                                                                                                        | 0.64 | 0.36         | 1.14         | .133  |
| <b>Ethnicity</b>                            |                                                                                                                                                                                                                                          |     |                     |       |                                                                                                                                                                                                                                             |      |              |              |       |
| White British                               | 94                                                                                                                                                                                                                                       | 2.4 | 14.208 <sup>#</sup> | .008  | 4224                                                                                                                                                                                                                                        | ref  |              |              | .574  |
| Any other white background                  | 11                                                                                                                                                                                                                                       | 3.3 |                     |       | 318                                                                                                                                                                                                                                         | 1.62 | 0.75         | 3.47         | .217  |
| Mixed or multiple ethnic groups             | 1                                                                                                                                                                                                                                        | 1.0 |                     |       | 62                                                                                                                                                                                                                                          | 0.84 | 0.11         | 6.27         | .866  |
| Asian or Asian British                      | 10                                                                                                                                                                                                                                       | 3.3 |                     |       | 160                                                                                                                                                                                                                                         | 1.58 | 0.61         | 4.09         | .346  |
| Black or Black British                      | 9                                                                                                                                                                                                                                        | 8.9 |                     |       | 66                                                                                                                                                                                                                                          | 2.36 | 0.70         | 7.94         | .166  |
| Other                                       | 1                                                                                                                                                                                                                                        | 1.2 |                     |       | 60                                                                                                                                                                                                                                          | 0.94 | 0.13         | 7.04         | .956  |
|                                             |                                                                                                                                                                                                                                          |     |                     |       | Hosmer & Lemeshow $\chi^2=9.111$ , df=8, p=0.333.<br>Final model $\chi^2=57.132$ , df=24, p<0.001<br>Nagelkerke = .067<br>Cases correctly classified: 98.1%.<br>88 cases excluded due to missing data on one or more independent variables. |      |              |              |       |

\* adjusted for all other variables in the model, AOR, adjusted odds ratio; ref, reference category; 95% CI, 95% confidence interval.

**Table S13 Family and friends – Association between trust in sources of information about COVID-19 vaccine and socio-demographic variables – (a) bivariate results and (b) multivariate logistic regression.**

|                                             | (a) Bivariate associations between socio-demographics and trusting COVID-19 vaccine info from family and friends<br>% Trust completely or a great deal (weighted)<br>$\chi^2$ test for differences by demographics |      |               |       | (b) Logistic regression of trust in COVID-19 vaccine info from family and friends<br>1 = Trust completely or a great deal (1139), 0 = Trust somewhat, very little or not at all (3752)                                                        |      |              |              |       |
|---------------------------------------------|--------------------------------------------------------------------------------------------------------------------------------------------------------------------------------------------------------------------|------|---------------|-------|-----------------------------------------------------------------------------------------------------------------------------------------------------------------------------------------------------------------------------------------------|------|--------------|--------------|-------|
|                                             | n                                                                                                                                                                                                                  | %    | $\chi^2$ (df) | P     | N                                                                                                                                                                                                                                             | AOR* | 95% CI Lower | 95% CI Upper | P     |
| <b>Gender</b>                               |                                                                                                                                                                                                                    |      |               |       |                                                                                                                                                                                                                                               |      |              |              |       |
| Male                                        | 557                                                                                                                                                                                                                | 23.2 | 4.455 (2)     | .108  | 2098                                                                                                                                                                                                                                          | ref  |              |              | .053  |
| Female                                      | 660                                                                                                                                                                                                                | 25.8 |               |       | 2784                                                                                                                                                                                                                                          | 1.17 | 1.01         | 1.34         | .030  |
| Other                                       | 2                                                                                                                                                                                                                  | 28.6 |               |       | 9                                                                                                                                                                                                                                             | 2.39 | 0.58         | 9.85         | .227  |
| <b>Age</b>                                  |                                                                                                                                                                                                                    |      |               |       |                                                                                                                                                                                                                                               |      |              |              |       |
| 18-29                                       | 140                                                                                                                                                                                                                | 17.0 | 109.226 (6)   | <.001 | 459                                                                                                                                                                                                                                           | ref  |              |              | <.001 |
| 30-39 v 18-29                               | 194                                                                                                                                                                                                                | 22.8 |               |       | 759                                                                                                                                                                                                                                           | 1.28 | 0.94         | 1.73         | .112  |
| 40-49 v 18-39                               | 186                                                                                                                                                                                                                | 23.3 |               |       | 834                                                                                                                                                                                                                                           | 1.18 | 0.94         | 1.47         | .157  |
| 50-59 v 18-49                               | 182                                                                                                                                                                                                                | 21.0 |               |       | 896                                                                                                                                                                                                                                           | 0.93 | 0.76         | 1.15         | .504  |
| 60-69 v 18-59                               | 176                                                                                                                                                                                                                | 24.8 |               |       | 1004                                                                                                                                                                                                                                          | 1.11 | 0.92         | 1.33         | .283  |
| 70-79 v 18-69                               | 233                                                                                                                                                                                                                | 35.6 |               |       | 762                                                                                                                                                                                                                                           | 1.85 | 1.54         | 2.23         | <.001 |
| 80+ v 18-79                                 | 90                                                                                                                                                                                                                 | 41.1 |               |       | 177                                                                                                                                                                                                                                           | 2.33 | 1.69         | 3.20         | <.001 |
| <b>Education/Highest qualification</b>      |                                                                                                                                                                                                                    |      |               |       |                                                                                                                                                                                                                                               |      |              |              |       |
| No qualifications                           | 203                                                                                                                                                                                                                | 33.0 | 70.692 (4)    | <.001 | 410                                                                                                                                                                                                                                           | ref  |              |              | <.001 |
| Degree or equivalent and above              | 403                                                                                                                                                                                                                | 19.4 |               |       | 2454                                                                                                                                                                                                                                          | 0.61 | 0.47         | 0.77         | <.001 |
| A levels / Vocational level 3 or equivalent | 271                                                                                                                                                                                                                | 23.9 |               |       | 990                                                                                                                                                                                                                                           | 0.81 | 0.62         | 1.05         | .112  |
| Other qual'ns below A level / Voc level 3   | 254                                                                                                                                                                                                                | 30.4 |               |       | 783                                                                                                                                                                                                                                           | 0.99 | 0.76         | 1.29         | .925  |
| Other qualification                         | 86                                                                                                                                                                                                                 | 28.5 |               |       | 254                                                                                                                                                                                                                                           | 0.96 | 0.68         | 1.36         | .812  |
| <b>Financial Status</b>                     |                                                                                                                                                                                                                    |      |               |       |                                                                                                                                                                                                                                               |      |              |              |       |
| Living comfortably                          | 330                                                                                                                                                                                                                | 25.7 | 6.383 (4)     | .172  | 1533                                                                                                                                                                                                                                          | ref  |              |              | .667  |
| Doing alright                               | 470                                                                                                                                                                                                                | 23.1 |               |       | 1997                                                                                                                                                                                                                                          | 0.94 | 0.79         | 1.10         | .424  |
| Just about getting by                       | 300                                                                                                                                                                                                                | 26.6 |               |       | 958                                                                                                                                                                                                                                           | 1.00 | 0.81         | 1.22         | .976  |
| Finding it quite difficult                  | 81                                                                                                                                                                                                                 | 24.0 |               |       | 266                                                                                                                                                                                                                                           | 1.03 | 0.75         | 1.42         | .856  |
| Finding it very difficult                   | 38                                                                                                                                                                                                                 | 21.8 |               |       | 137                                                                                                                                                                                                                                           | 0.75 | 0.47         | 1.18         | .212  |
| <b>Country</b>                              |                                                                                                                                                                                                                    |      |               |       |                                                                                                                                                                                                                                               |      |              |              |       |
| England                                     | 1051                                                                                                                                                                                                               | 24.6 | 13.592 (2)    | .001  | 4299                                                                                                                                                                                                                                          | ref  |              |              | .012  |
| Scotland                                    | 89                                                                                                                                                                                                                 | 20.1 |               |       | 384                                                                                                                                                                                                                                           | 1.00 | 0.77         | 1.29         | .976  |
| Wales                                       | 78                                                                                                                                                                                                                 | 32.9 |               |       | 208                                                                                                                                                                                                                                           | 1.59 | 1.17         | 2.17         | .003  |
| <b>Urban/rural</b>                          |                                                                                                                                                                                                                    |      |               |       |                                                                                                                                                                                                                                               |      |              |              |       |
| Urban                                       | 979                                                                                                                                                                                                                | 24.5 | .029 (1)      | .866  | 3726                                                                                                                                                                                                                                          |      |              |              |       |
| Rural                                       | 239                                                                                                                                                                                                                | 24.8 |               |       | 1165                                                                                                                                                                                                                                          | 0.91 | 0.77         | 1.07         | .237  |
| <b>Ethnicity</b>                            |                                                                                                                                                                                                                    |      |               |       |                                                                                                                                                                                                                                               |      |              |              |       |
| White British                               | 1005                                                                                                                                                                                                               | 25.1 | 36.523 (5)    | <.001 | 4226                                                                                                                                                                                                                                          | ref  |              |              | .029  |
| Any other white background                  | 50                                                                                                                                                                                                                 | 15.0 |               |       | 317                                                                                                                                                                                                                                           | 0.79 | 0.58         | 1.07         | .128  |
| Mixed or multiple ethnic groups             | 15                                                                                                                                                                                                                 | 15.5 |               |       | 62                                                                                                                                                                                                                                            | 0.76 | 0.38         | 1.51         | .428  |
| Asian or Asian British                      | 100                                                                                                                                                                                                                | 32.8 |               |       | 160                                                                                                                                                                                                                                           | 1.52 | 1.06         | 2.18         | .024  |
| Black or Black British                      | 27                                                                                                                                                                                                                 | 26.7 |               |       | 67                                                                                                                                                                                                                                            | 1.39 | 0.79         | 2.46         | .250  |
| Other                                       | 12                                                                                                                                                                                                                 | 15.2 |               |       | 59                                                                                                                                                                                                                                            | 0.53 | 0.24         | 1.18         | .122  |
|                                             |                                                                                                                                                                                                                    |      |               |       | Hosmer & Lemeshow $\chi^2= 6.067$ , df=8, p=0.640.<br>Final model $\chi^2=153.732$ , df=24, p<0.001<br>Nagelkerke = .047<br>Cases correctly classified: 76.7%.<br>87 cases excluded due to missing data on one or more independent variables. |      |              |              |       |

\* adjusted for all other variables in the model, AOR, adjusted odds ratio; ref, reference category; 95% CI, 95% confidence interval.

**Table S14 Faith or community leaders – Association between trust in sources of information about COVID-19 vaccine and socio-demographic variables – (a) bivariate results and (b) multivariate logistic regression.**

|                                             | (a) Bivariate associations between socio-demographics and trusting COVID-19 vaccine info from faith and community leaders<br>% Trust completely or a great deal (weighted)<br>$\chi^2$ test for differences by demographics |      |               |       | (b) Logistic regression of trust in COVID-19 vaccine info from faith and community leaders<br>1 = Trust completely or a great deal (161), 0 = Trust somewhat, very little or not at all (4724)                                                |       |              |              |       |
|---------------------------------------------|-----------------------------------------------------------------------------------------------------------------------------------------------------------------------------------------------------------------------------|------|---------------|-------|-----------------------------------------------------------------------------------------------------------------------------------------------------------------------------------------------------------------------------------------------|-------|--------------|--------------|-------|
|                                             | n                                                                                                                                                                                                                           | %    | $\chi^2$ (df) | P     | N                                                                                                                                                                                                                                             | AOR*  | 95% CI Lower | 95% CI Upper | P     |
| <b>Gender</b>                               |                                                                                                                                                                                                                             |      |               |       |                                                                                                                                                                                                                                               |       |              |              |       |
| Male                                        | 118                                                                                                                                                                                                                         | 4.9  | 17.452 (2)    | <.001 | 2095                                                                                                                                                                                                                                          | ref   |              |              | .006  |
| Female                                      | 135                                                                                                                                                                                                                         | 5.3  |               |       | 2781                                                                                                                                                                                                                                          | 1.19  | 0.86         | 1.66         | .294  |
| Other                                       | 3                                                                                                                                                                                                                           | 37.5 |               |       | 9                                                                                                                                                                                                                                             | 14.06 | 2.67         | 73.92        | .002  |
| <b>Age</b>                                  |                                                                                                                                                                                                                             |      |               |       |                                                                                                                                                                                                                                               |       |              |              |       |
| 18-29                                       | 47                                                                                                                                                                                                                          | 5.7  | 20.879 (6)    | .002  | 459                                                                                                                                                                                                                                           | ref   |              |              | .041  |
| 30-39 v 18-29                               | 46                                                                                                                                                                                                                          | 5.4  |               |       | 758                                                                                                                                                                                                                                           | 0.95  | 0.47         | 1.93         | .880  |
| 40-49 v 18-39                               | 31                                                                                                                                                                                                                          | 3.9  |               |       | 834                                                                                                                                                                                                                                           | 1.11  | 0.65         | 1.89         | .710  |
| 50-59 v 18-49                               | 46                                                                                                                                                                                                                          | 5.3  |               |       | 895                                                                                                                                                                                                                                           | 1.70  | 1.09         | 2.65         | .020  |
| 60-69 v 18-59                               | 20                                                                                                                                                                                                                          | 2.8  |               |       | 1003                                                                                                                                                                                                                                          | 0.98  | 0.61         | 1.58         | .933  |
| 70-79 v 18-69                               | 42                                                                                                                                                                                                                          | 6.4  |               |       | 760                                                                                                                                                                                                                                           | 1.62  | 1.03         | 2.55         | .038  |
| 80+ v 18-79                                 | 20                                                                                                                                                                                                                          | 9.2  |               |       | 176                                                                                                                                                                                                                                           | 2.28  | 1.15         | 4.56         | .019  |
| <b>Education/Highest qualification</b>      |                                                                                                                                                                                                                             |      |               |       |                                                                                                                                                                                                                                               |       |              |              |       |
| No qualifications                           | 57                                                                                                                                                                                                                          | 9.3  | 37.137 (4)    | <.001 | 407                                                                                                                                                                                                                                           | ref   |              |              | .011  |
| Degree or equivalent and above              | 76                                                                                                                                                                                                                          | 3.7  |               |       | 2451                                                                                                                                                                                                                                          | 0.42  | 0.25         | 0.71         | <.001 |
| A levels / Vocational level 3 or equivalent | 51                                                                                                                                                                                                                          | 4.5  |               |       | 990                                                                                                                                                                                                                                           | 0.57  | 0.33         | 0.99         | .048  |
| Other qual'ns below A level / Voc level 3   | 58                                                                                                                                                                                                                          | 6.9  |               |       | 782                                                                                                                                                                                                                                           | 0.75  | 0.44         | 1.28         | .290  |
| Other qualification                         | 15                                                                                                                                                                                                                          | 4.9  |               |       | 255                                                                                                                                                                                                                                           | 0.50  | 0.22         | 1.14         | .098  |
| <b>Financial Status</b>                     |                                                                                                                                                                                                                             |      |               |       |                                                                                                                                                                                                                                               |       |              |              |       |
| Living comfortably                          | 59                                                                                                                                                                                                                          | 4.6  | 39.487 (4)    | <.001 | 1530                                                                                                                                                                                                                                          | ref   |              |              | .042  |
| Doing alright                               | 71                                                                                                                                                                                                                          | 3.5  |               |       | 1997                                                                                                                                                                                                                                          | 0.91  | 0.59         | 1.39         | .663  |
| Just about getting by                       | 84                                                                                                                                                                                                                          | 7.5  |               |       | 955                                                                                                                                                                                                                                           | 1.46  | 0.92         | 2.33         | .110  |
| Finding it quite difficult                  | 20                                                                                                                                                                                                                          | 5.9  |               |       | 266                                                                                                                                                                                                                                           | 2.05  | 1.09         | 3.84         | .025  |
| Finding it very difficult                   | 20                                                                                                                                                                                                                          | 11.5 |               |       | 137                                                                                                                                                                                                                                           | 1.44  | 0.60         | 3.44         | .417  |
| <b>Country</b>                              |                                                                                                                                                                                                                             |      |               |       |                                                                                                                                                                                                                                               |       |              |              |       |
| England                                     | 239                                                                                                                                                                                                                         | 5.6  | 12.569 (2)    | .002  | 4294                                                                                                                                                                                                                                          | ref   |              |              | .592  |
| Scotland                                    | 11                                                                                                                                                                                                                          | 2.5  |               |       | 383                                                                                                                                                                                                                                           | 0.69  | 0.33         | 1.43         | .316  |
| Wales                                       | 5                                                                                                                                                                                                                           | 2.1  |               |       | 208                                                                                                                                                                                                                                           | 1.07  | 0.46         | 2.48         | .877  |
| <b>Urban/rural</b>                          |                                                                                                                                                                                                                             |      |               |       |                                                                                                                                                                                                                                               |       |              |              |       |
| Urban                                       | 229                                                                                                                                                                                                                         | 5.7  | 13.640 (1)    | <.001 | 3722                                                                                                                                                                                                                                          |       |              |              |       |
| Rural                                       | 27                                                                                                                                                                                                                          | 2.8  |               |       | 1163                                                                                                                                                                                                                                          | 0.66  | 0.42         | 1.03         | .068  |
| <b>Ethnicity</b>                            |                                                                                                                                                                                                                             |      |               |       |                                                                                                                                                                                                                                               |       |              |              |       |
| White British                               | 163                                                                                                                                                                                                                         | 4.1  | 152.072(5)    | <.001 | 4219                                                                                                                                                                                                                                          | ref   |              |              | <.001 |
| Any other white background                  | 12                                                                                                                                                                                                                          | 3.6  |               |       | 318                                                                                                                                                                                                                                           | 1.22  | 0.60         | 2.46         | .583  |
| Mixed or multiple ethnic groups             | 3                                                                                                                                                                                                                           | 3.1  |               |       | 62                                                                                                                                                                                                                                            | 2.59  | 0.90         | 7.42         | .077  |
| Asian or Asian British                      | 59                                                                                                                                                                                                                          | 19.6 |               |       | 159                                                                                                                                                                                                                                           | 4.82  | 2.76         | 8.42         | <.001 |
| Black or Black British                      | 12                                                                                                                                                                                                                          | 11.9 |               |       | 67                                                                                                                                                                                                                                            | 4.52  | 2.04         | 9.99         | <.001 |
| Other                                       | 2                                                                                                                                                                                                                           | 2.5  |               |       | 60                                                                                                                                                                                                                                            | 1.37  | 0.32         | 5.77         | .669  |
|                                             |                                                                                                                                                                                                                             |      |               |       | Hosmer & Lemeshow $\chi^2= 11.202$ , df=8, p=0.191.<br>Final model $\chi^2=87.282$ , df=24, p<0.001<br>Nagelkerke = .070<br>Cases correctly classified: 96.7%.<br>93 cases excluded due to missing data on one or more independent variables. |       |              |              |       |

\* adjusted for all other variables in the model, AOR, adjusted odds ratio; ref, reference category; 95% CI, 95% confidence interval.

## Supplementary material to ‘A national survey of attitudes towards and intentions to vaccinate against COVID-19: implications for communications’.

### Checklist: STROBE Statement – items that should be included in reports of cross-sectional studies

|                           | Item No | Recommendation                                                                                                                                                                                    | Location where item is reported                                                                                                                                                                                               |
|---------------------------|---------|---------------------------------------------------------------------------------------------------------------------------------------------------------------------------------------------------|-------------------------------------------------------------------------------------------------------------------------------------------------------------------------------------------------------------------------------|
| <b>Title and abstract</b> | 1       | (a) Indicate the study’s design with a commonly used term in the title or the abstract                                                                                                            | pp. 1-2<br><i>Title and abstract</i>                                                                                                                                                                                          |
|                           |         | (b) Provide in the abstract an informative and balanced summary of what was done and what was found                                                                                               | p.2<br><i>Abstract</i>                                                                                                                                                                                                        |
| <b>Introduction</b>       |         |                                                                                                                                                                                                   |                                                                                                                                                                                                                               |
| Background/rationale      | 2       | Explain the scientific background and rationale for the investigation being reported                                                                                                              | p.4<br><i>Introduction</i>                                                                                                                                                                                                    |
| Objectives                | 3       | State specific objectives, including any prespecified hypotheses                                                                                                                                  | p.4<br><i>Introduction (third paragraph). As this was the first survey of this type which addressed actual, rather than hypothetical, vaccines; we conducted an exploratory investigation rather than testing hypotheses.</i> |
| <b>Methods</b>            |         |                                                                                                                                                                                                   |                                                                                                                                                                                                                               |
| Study design              | 4       | Present key elements of study design early in the paper                                                                                                                                           | p.5<br><i>Methods (opening paragraph)</i>                                                                                                                                                                                     |
| Setting                   | 5       | Describe the setting, locations, and relevant dates, including periods of recruitment, exposure, follow-up, and data collection                                                                   | p.6<br><i>Methods: Sample and data collection</i>                                                                                                                                                                             |
| Participants              | 6       | (a) Give the eligibility criteria, and the sources and methods of selection of participants                                                                                                       | p.6<br><i>Methods: Sample and data collection;</i>                                                                                                                                                                            |
| Variables                 | 7       | Clearly define all outcomes, exposures, predictors, potential confounders, and effect modifiers. Give diagnostic criteria, if applicable                                                          | pp.5-6; and pp.S2-S13 (in Supplementary Material)<br><i>Methods: Measures; and Methods S1</i>                                                                                                                                 |
| Data sources/ measurement | 8*      | For each variable of interest, give sources of data and details of methods of assessment (measurement). Describe comparability of assessment methods if there is more than one group              | pp.5-6; and pp.S2-S13 (in Supplementary Material)<br><i>Methods: Measures; and Methods S1</i>                                                                                                                                 |
| Bias                      | 9       | Describe any efforts to address potential sources of bias                                                                                                                                         | p.6<br><i>Methods: Sample and data collection (Survey used a probability sample; participants accessed online or by telephone, sent reminders—addressing response bias)</i>                                                   |
| Study size                | 10      | Explain how the study size was arrived at                                                                                                                                                         | p.6<br><i>Methods: Sample and data collection</i>                                                                                                                                                                             |
| Quantitative variables    | 11      | Explain how quantitative variables were handled in the analyses. If applicable, describe which groupings were chosen and why                                                                      | pp.6-7<br><i>Methods: Data analysis</i>                                                                                                                                                                                       |
| Statistical methods       | 12      | (a) Describe all statistical methods, including those used to control for confounding                                                                                                             | pp.6-7<br><i>Methods: Data analysis</i>                                                                                                                                                                                       |
|                           |         | (b) Describe any methods used to examine subgroups and interactions                                                                                                                               | pp.6-7<br><i>Methods: Data analysis</i>                                                                                                                                                                                       |
|                           |         | (c) Explain how missing data were addressed                                                                                                                                                       | pp.6-7<br><i>Methods: Data analysis</i>                                                                                                                                                                                       |
|                           |         | (d) If applicable, describe analytical methods taking account of sampling strategy                                                                                                                | pp.6-7<br><i>Methods: Data analysis</i>                                                                                                                                                                                       |
|                           |         | (e) Describe any sensitivity analyses                                                                                                                                                             | Not applicable                                                                                                                                                                                                                |
| <b>Results</b>            |         |                                                                                                                                                                                                   |                                                                                                                                                                                                                               |
| Participants              | 13*     | (a) Report numbers of individuals at each stage of study—eg numbers potentially eligible, examined for eligibility, confirmed eligible, included in the study, completing follow-up, and analysed | p.S14 (in Supplementary Material)<br><i>Table S1</i>                                                                                                                                                                          |
|                           |         | (b) Give reasons for non-participation at each stage                                                                                                                                              | p.S14 (in Supplementary Material)<br><i>Table S1</i>                                                                                                                                                                          |
|                           |         | (c) Consider use of a flow diagram                                                                                                                                                                | Not required                                                                                                                                                                                                                  |

|                          | <b>Item No</b> | <b>Recommendation</b>                                                                                                                                                                                        | <b>Location where item is reported</b>                                                                                            |
|--------------------------|----------------|--------------------------------------------------------------------------------------------------------------------------------------------------------------------------------------------------------------|-----------------------------------------------------------------------------------------------------------------------------------|
| Descriptive data         | 14*            | (a) Give characteristics of study participants (eg demographic, clinical, social) and information on exposures and potential confounders                                                                     | p.7; and pp.17-18<br><i>Results: Sample characteristics; and Table 1</i>                                                          |
|                          |                | (b) Indicate number of participants with missing data for each variable of interest                                                                                                                          | pp.19-22 and pp.S16-S28 (in Supplementary Material)<br><i>Tables 2-4 and S2-S14</i>                                               |
| Outcome data             | 15*            | Report numbers of outcome events or summary measures                                                                                                                                                         | pp.19-22 and pp.S16-S28 (in Supplementary Material)<br><i>Tables 2-4 and S2-S14</i>                                               |
| Main results             | 16             | (a) Give unadjusted estimates and, if applicable, confounder-adjusted estimates and their precision (eg, 95% confidence interval). Make clear which confounders were adjusted for and why they were included | pp.7-9; pp.21-22 and pp.S16-S28 (in Supplementary Material)<br><i>Results; Tables 3-4 and S2-S14</i>                              |
|                          |                | (b) Report category boundaries when continuous variables were categorized                                                                                                                                    | Not applicable (all variables were categorical)                                                                                   |
|                          |                | (c) If relevant, consider translating estimates of relative risk into absolute risk for a meaningful time period                                                                                             | Not applicable                                                                                                                    |
| Other analyses           | 17             | Report other analyses done—eg analyses of subgroups and interactions, and sensitivity analyses                                                                                                               | pp.S16-S28 (in Supplementary Material)<br><i>Tables S2-S14 (subgroup analyses of the 13 COVID-19 vaccine information sources)</i> |
| <b>Discussion</b>        |                |                                                                                                                                                                                                              |                                                                                                                                   |
| Key results              | 18             | Summarise key results with reference to study objectives                                                                                                                                                     | p.9<br><i>Discussion: Principal findings</i>                                                                                      |
| Limitations              | 19             | Discuss limitations of the study, taking into account sources of potential bias or imprecision. Discuss both direction and magnitude of any potential bias                                                   | p.11<br><i>Discussion: Strengths and limitations</i>                                                                              |
| Interpretation           | 20             | Give a cautious overall interpretation of results considering objectives, limitations, multiplicity of analyses, results from similar studies, and other relevant evidence                                   | pp.9-11<br><i>Discussion: Comparison with other studies; and Discussion: Strengths and limitations</i>                            |
| Generalisability         | 21             | Discuss the generalisability (external validity) of the study results                                                                                                                                        | p.11<br><i>Discussion: Strengths and limitations</i>                                                                              |
| <b>Other information</b> |                |                                                                                                                                                                                                              |                                                                                                                                   |
| Funding                  | 22             | Give the source of funding and the role of the funders for the present study and, if applicable, for the original study on which the present article is based                                                | p.12<br><i>Role of the funding source</i>                                                                                         |

\*Give information separately for exposed and unexposed groups.
